# Supplementary material for: Positive Effect of Lactobacillus acidophilus EG004 on Cognitive Ability of Healthy Mice by Fecal Microbiome Analysis Using Full-Length 16S-23S rRNA Metagenome Sequencing
Source: PubMed Central journal article supplement (PMC8754107; doi:10.1128/spectrum.01815-21), 2022-01-12
Supplement: reviewer-comments.pdf [file reviewer-comments.pdf]

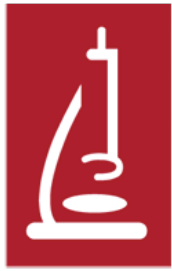

AMERICAN  
SOCIETY FOR  
MICROBIOLOGY

# Microbiology Spectrum

## Positive effect on cognitive ability of *Lactobacillus acidophilus* EG004 in healthy mouse and fecal microbiome analysis using full-length 16S-23S rRNA metagenome sequencing

Soomin Jeon, Hyaekang Kim, Jina Kim, Jinchul Jo, Donghyeok Seol, Youngseok Choi, Seoae Cho, and Heebal Kim

*Corresponding Author(s): Heebal Kim, Seoul National University*

---

### Review Timeline:

|                     |                   |
|---------------------|-------------------|
| Submission Date:    | October 20, 2021  |
| Editorial Decision: | November 15, 2021 |
| Revision Received:  | November 21, 2021 |
| Editorial Decision: | November 29, 2021 |
| Revision Received:  | December 6, 2021  |
| Accepted:           | December 7, 2021  |

---

*Editor: Jan Claesen*

*Reviewer(s): Disclosure of reviewer identity is with reference to reviewer comments included in decision letter(s). The following individuals involved in review of your submission have agreed to reveal their identity: Bo Cui (Reviewer #2); Rustem Abuzarovich Ilyasov (Reviewer #3)*

### Transaction Report:

(Note: With the exception of the correction of typographical or spelling errors that could be a source of ambiguity, letters and reports are not edited. The original formatting of letters and referee reports may not be reflected in this compilation.)

DOI: <https://doi.org/10.1128/Spectrum.01815-21>

November 15, 2021

Prof. Heebal Kim  
Seoul National University  
Seoul  
Korea (South), Republic of

Re: Spectrum01815-21 (Positive effect on cognitive ability of *Lactobacillus acidophilus* EG004 in healthy mouse and fecal microbiome analysis using full-length 16S-23S rRNA metagenome sequencing)

Dear Prof. Heebal Kim:

Thank you for submitting your manuscript to Microbiology Spectrum. As you will see your paper is very close to acceptance. Please modify the manuscript along the lines I have recommended. As these revisions are quite minor, I expect that you should be able to turn in the revised paper in less than 30 days, if not sooner. If your manuscript was reviewed, you will find the reviewers' comments below.

When submitting the revised version of your paper, please provide (1) point-by-point responses to the issues I raised in your cover letter, and (2) a PDF file that indicates the changes from the original submission (by highlighting or underlining the changes) as file type "Marked Up Manuscript - For Review Only". Please use this link to submit your revised manuscript. Detailed instructions on submitting your revised paper are below.

Link Not Available

Thank you for the privilege of reviewing your work. Below you will find instructions from the Microbiology Spectrum editorial office and comments generated during the review.

The ASM Journals program strives for constant improvement in our submission and publication process. Please tell us how we can improve your experience by taking this quick [Author Survey](#).

Sincerely,

Jan Claesen

Editor, Microbiology Spectrum

Reviewer comments:

Reviewer #3 (Public repository details (Required)):

The metagenome sequencing data (16S-23S rRNA) should be submitted to GenBank if it is not submitted yet.

Reviewer #3 (Comments for the Author):

Manuscript: Spectrum01815-21 Positive effect on cognitive ability of *Lactobacillus acidophilus* EG004 in healthy mouse and fecal microbiome analysis using full-length 16S-23S rRNA metagenome sequencing

The aim of the paper is to study effect on cognitive ability of *Lactobacillus acidophilus* EG004 in healthy mouse and fecal microbiome analysis using full-length 16S-23S rRNA metagenome sequencing. In the manuscript, the authors studied a bacterial strain *Lactobacillus acidophilus* EG004 with a positive effect on cognitive ability using a healthy animal model. The authors experimentally verified improved cognitive ability by cognitive behavioral tests. The authors performed full 16S-23S rRNA sequencing and provided gut microbiome composition at a species level. The provided microbiome composition consisted of candidate microbial groups as a biomarker that shows positive effects on cognitive ability. Therefore, their study suggests a new perspective for probiotic strain use applicable for medicine. The uniqueness of the text is 90% by AntyPlagiarism.net. The manuscript is written well. English is proper, well understandable.

Reviewer has some comments:

Line 74 - most of researches were - should be - most of the researches was.  
Line 73 - many researches - should be - many pieces of research.  
Line 82 - industrialization process - should be - industrialization processes.  
Line 105 - for the sentence - Autism, Alzheimer's disease, and Parkinson's disease (7-9) - add additional citation (Danilenko et al., 2021) and add to the References - Danilenko, V.N., Devyatkin, A.V., Marsova, M.V., Shibilova, M.U., Ilyasov, R.A., Shmyrev, V.I., 2021b. Common inflammatory mechanisms in COVID-19 and Parkinson's diseases: the role of microbiome and probiotics in their prevention. Journal of Inflammation Research 14, (In press). doi: 10.2147/JIR.S333887.  
Line 108 -to the sentence - the neural pathways of the brain-gut axis (10). - add additional citation (Fetissov et al., 2019). and add to the References - Fetissov, S.O., Averina, O.V., Danilenko, V.N., 2019. Neuropeptides in the microbiota-brain axis and feeding behavior in autism spectrum disorder. Nutrition 61, 43-48. doi: 10.1016/j.nut.2018.10.030.  
Line 112 - Second, the second suggestion - should be - Second, the suggestion  
Line 113 - microbiome affect brain - should be - microbiome affects brain.  
Line 113 - metabolic pathway - should be - metabolic pathways.  
Line 127 - remove one dot.  
Line 153 - The averages daily - should be - The averages of daily.  
Line 168 - In the comparison of - should be - The comparison of.  
Line 194 - light room - should be - lightroom.  
Line 195 - remove italics of the word - group.  
Line 226 - comparison - should be - comparative.  
Line 236 - familiae - should be - families.  
Line 275 - whole genome - should be - whole-genome.  
Line 308 - recognition test and passive avoidance task - should be - recognition tests and passive avoidance tasks.  
Line 321 - were - should be - was.  
Line 343 - factor - should be - factors.  
Line 350 - purpose - should be - purposes.  
Line 370 - these evidences - should be - this evidence.  
Line 398 - negative effect - should be - negative effects.  
Line 408 - to provide - should be - provide.  
Line 413 - These analyses were not covered to identification of a biological factor caused - should be - These analyses were not covered in the identification of a biological factor that caused.  
Line 416 - probiotics ingestion - should be - probiotic ingestion.  
Line 444 - by - should be - at.  
Line 442 - with - should be - at.  
Line 453 - add space after dot.  
Line 457 - from probiotics intake - should be - after probiotic intake.  
Line 459 - room condition - should be - room conditions.  
Line 472 - rodent's habit - should be - rodents' habits.  
Line 478 - entered - should be - that entered.  
Line 486 - preference - should be - preferences.  
Line 516 - After 1 minute for adaptation - should be - After 1 minute of adaptation.  
Line 531 - time taken - should be - time is taken.  
Line 554 - correction - should be - corrections.  
Line 789 - statistic - should be - statistics.  
The metagenome sequencing data (16S-23S rRNA) should be submitted to GenBank.  
Please check English by professional translator one more times.  
In further authors should study details of biological factors and molecular mechanisms that caused improved cognitive ability in mice after treatment with *L. acidophilus* EG004 strain.

No other comments.

A minor revision is required.

### Preparing Revision Guidelines

To submit your modified manuscript, log onto the eJP submission site at <https://spectrum.msubmit.net/cgi-bin/main.plex>. Go to Author Tasks and click the appropriate manuscript title to begin the revision process. The information that you entered when you first submitted the paper will be displayed. Please update the information as necessary. Here are a few examples of required updates that authors must address:

- point-by-point responses to the issues I raised in your cover letter
- Upload a compare copy of the manuscript (without figures) as a "Marked-Up Manuscript" file.
- Each figure must be uploaded as a separate file, and any multipanel figures must be assembled into one file.

- Manuscript: A .DOC version of the revised manuscript
- Figures: Editable, high-resolution, individual figure files are required at revision, TIFF or EPS files are preferred

For complete guidelines on revision requirements, please see the journal Submission and Review Process requirements at <https://journals.asm.org/journal/Spectrum/submission-review-process>. **Submissions of a paper that does not conform to Microbiology Spectrum guidelines will delay acceptance of your manuscript. "**

Please return the manuscript within 60 days; if you cannot complete the modification within this time period, please contact me. If you do not wish to modify the manuscript and prefer to submit it to another journal, please notify me of your decision immediately so that the manuscript may be formally withdrawn from consideration by Microbiology Spectrum.

If your manuscript is accepted for publication, you will be contacted separately about payment when the proofs are issued; please follow the instructions in that e-mail. Arrangements for payment must be made before your article is published. For a complete list of **Publication Fees**, including supplemental material costs, please visit our [website](#).

Corresponding authors may [join or renew ASM membership](#) to obtain discounts on publication fees. Need to upgrade your membership level? Please contact Customer Service at [Service@asmusa.org](mailto:Service@asmusa.org).

Thank you for submitting your paper to Microbiology Spectrum.

1 **Title**

2 Positive effect on cognitive ability of *Lactobacillus acidophilus* EG004 in healthy  
3 mouse and fecal microbiome analysis using full-length 16S-23S rRNA  
4 metagenome sequencing

5

6 **Running title**

7 Positive effect on cognitive ability of *Lactobacillus acidophilus* EG004

8

9 **Authors**

10 Soomin Jeon<sup>a,†</sup>, Hyaekang Kim<sup>a,†</sup>, Jina Kim<sup>a</sup>, Donghyeok Seol<sup>a,b</sup>, Jinchul Jo<sup>a</sup>,  
11 Youngseok Choi<sup>a</sup>, Seoae Cho<sup>b</sup>, Heebal Kim<sup>a,b,d,\*</sup>

12 <sup>a</sup>Department of Agricultural Biotechnology and Research Institute of Agriculture  
13 and Life Sciences, Seoul National University, Seoul, Republic of Korea

14 <sup>b</sup>eGnome, Inc, Seoul, Republic of Korea

15 <sup>d</sup>Interdisciplinary Program in Bioinformatics, Seoul National University, Seoul,  
16 Republic of Korea

17 <sup>\*</sup>Corresponding authors

18 † Soomin Jeon and Hyaekang Kim contributed equally to this work. Author order  
19 was determined retroalphabetically.

20

21 Soomin Jeon

22 Email: soty23@snu.ac.kr

23 Hyaekang Kim

24 Email:hkim458@snu.ac.kr

25 Jina Kim

26 Email:jinak750@gmail.com

27 Donghyeok Seol

28 Email:sdh1621@snu.ac.kr

29 Jinchul Jo

30 Email: macjoo2000@snu.ac.kr

31 Youngseok Choi

32 Email:seok1213neo@snu.ac.kr

33 Seoae Cho

34 Email:seoae@egenome.co.kr

35 Heebal Kim

36 Email: heebal@snu.ac.kr

37

38 \*Correspondence

39 Heebal Kim, Department of Agricultural Biotechnology and Research Institute of  
40 Agriculture and Life Sciences, Seoul National University, Seoul, Republic of  
41 Korea

42 Email: heebal@snu.ac.kr

43 Tel.: +82-2-880-4822

44 Fax: +82-2-883-8812

45

46 **Word count**

47 Abstract; 249 words

48 Text; 4245 words (excluding materials and methods) and 6903 words (including  
49 materials and methods)

50

## 51 **Abstract**

52 The concept of the ‘Gut-brain axis’ has risen. Many types of research demonstrated the effect and  
53 mechanism of the GBA. Although many studies have been reported, most of the studies are  
54 focused on neurodegenerative disease and it is still not clear what type of bacterial strains have  
55 positive effects on the brain. Therefore, we designed an experiment to discover a strain that  
56 positively affects cognitive ability using healthy mice. The experimental group consisted of a  
57 control group and three probiotic consumption groups, *Lactobacillus acidophilus*,  
58 *Lacticaseibacillus paracasei*, and *Lacticaseibacillus rhamnosus*, which are verified to have  
59 beneficial effects for host health as the gut microbiome. Cognitive ability was measured by 4  
60 cognitive-behavioral tests and the group fed on *L. acidophilus* showed the most improved  
61 cognitive ability. To provide an understanding of the altered microbial composition effect on the  
62 brain, we performed full 16S-23S rRNA sequencing using Nanopore, and OTUs were identified  
63 at a species level. In the group fed on *L. acidophilus*, the intestinal bacterial ratio of Firmicutes  
64 and Proteobacteria phyla increased and the bacterial proportions of 16 species were significantly  
65 different from those of the control group. We estimated that the positive results on the cognitive  
66 behavioral tests were due to the increased proportion of *L. acidophilus* EG004 strain in the  
67 subjects’ intestines since the strain is capable of producing butyrate and therefore modulating  
68 neurotransmitters and neurotrophic factors. We expect that our new strain expands the industrial  
69 field of *L. acidophilus* and helps understand the mechanism of the brain-gut axis.

70

## 71 **Importance**

72 In recent, the concept of 'gut-brain axis' has risen that microbes in the GI tract affect brain by



73 modulating signal molecules. Although many researches were reported in a short period, a  
74 signaling mechanism and effect of a specific bacterial strain are still unclear. Besides, since most  
75 of researches were focused on neurodegenerative disease, the study with a healthy animal model  
76 is still insufficient. In this study, we provide a bacterial strain (*Lactobacillus acidophilus* EG004)  
77 with a positive effect on cognitive ability using a healthy animal model. We experimentally  
78 verified improved cognitive ability by cognitive behavioral tests. We performed full 16S-23S  
79 rRNA sequencing using nanopore MinION, and provided gut microbiome composition at a  
80 species level. The provided microbiome composition consisted of candidate microbial groups as  
81 a biomarker that shows positive effects on cognitive ability. Therefore, our study suggests a new  
82 perspective for probiotic strain use applicable for various industrialization process.

83

#### 84 **Keywords**

85 *Lactobacillus acidophilus*, gut microbiome, gut-brain axis, cognitive ability, Nanopore  
86 sequencing

87

## 88 **Introduction**

89       The human body is a complex community that habituates various bacteria. Among the  
90 bacterial communities in the human body, the gastrointestinal tract is the best bacterial  
91 community that has the most abundant and various bacteria (1). In 2006, having been released  
92 research that obesity is associated with bacterial composition in the gut, a study for gut  
93 microbiome began in earnest (2). The gut microbiome is defined as the collective genomes of  
94 microorganisms that live in the gastrointestinal tract. Functions of the gut microbiome have been  
95 reported such as nutrient metabolism and regulation of the immune system for the host (3).  
96 Microbial composition in the gut is altered by environmental factors like age, diet, stress, and  
97 lifestyle, and the change in microbial composition can induce physical changes in the host (4). In  
98 recent, the gut microbiome's effects on the brain have been proved and the concept of the brain-  
99 gut axis has risen to the surface (5). The brain-gut axis is a complex system involving the enteric  
100 nervous system and central nervous system including the brain and spinal cord, and it works with  
101 bidirectional communication between the central and the enteric nervous system (6). Although  
102 the brain is located apart from the gut, the gut microbiome can affect the brain by stimulating the  
103 enteric nervous system and vagus nerve. Thus, dysbiosis of the gut microbiome often causes  
104 brain diseases. The recent experimental results described that gut microbiome dysbiosis was  
105 observed in patients with **Autism, Alzheimer's disease, and Parkinson's disease (7-9)**. At the  
106 same time, studies on the mechanisms to understand the brain-gut axis have been conducted.  
107 First, it was suggested that the microbial-derived metabolites are the main components acting on  
108 **the neural pathways of the brain-gut axis (10)**. The most well-studied substances are short-chain  
109 fatty acids (SCFA) such as acetate, propionate, and butyrate, which are produced in the process  
110 of decomposing non-digestible fibers and carbohydrates (11). It promotes indirect signaling to

111 the brain by modulation and induction of neurotransmitter and neurotrophic factors like  $\gamma$ -  
112 aminobutyric acid (GABA) and Brain-derived neurotrophic factor (BDNF). Second, the second  
113 suggestion was that the gut microbiome affect brain function by regulating metabolic pathway  
114 (12). Previous research reported that the level of tryptophan metabolites including serotonin and  
115 indolepyruvate was altered by the gut microbiome. These metabolites have roles in the  
116 functioning of the gut-brain axis such as signaling and anti-oxidant. Third, the gut microbiome  
117 may affect the brain by immune pathway (13). Interferon (IFN), Tumor necrosis factor (TNF),  
118 and Interleukin are well-known immune factors. According to recent studies, the amount of the  
119 immune factors is regulated by the intestinal microflora. These immune factors affect brain  
120 function by stimulating and activating the hypothalamic-pituitary-adrenal axis. Finally, it was  
121 suggested that gut microbes directly influence the brain by altering the fatty acid composition of  
122 the brain (14). Several studies have been reported on the correlation between intestinal  
123 microbes and the brain, but the specific mechanism of the brain-gut axis is still not clear.

124 Probiotics are defined as bacteria that have positive effects on the host body (15). Probiotics  
125 have been widely used as a health supplement since it has various beneficial functions to host's  
126 health with high adhesion property to the intestine and low side effect. Most probiotics include  
127 bacteria genera that are gram-positive, facultative anaerobic and rod-shaped.. *Lacticaseibacillus*  
128 *rhamnosus* (*Lcb. rhamnosus*) is one of the longest-studied probiotic species, and many strains  
129 such as LGG and GR-1 belonging to this genus are commercially available. It is well known that  
130 *Lcb. rhamnosus* has positive effects on diarrhea, acute gastroenteritis, and atopic dermatitis (16-  
131 18). Recently, its neurobehavioral effects such as anxiety and depression relief have been  
132 reported (19). *Lacticaseibacillus paracasei* (*Lcb. paracasei*) is one of the representative probiotic  
133 species, and it has been studied to be effective in treating ulcerative colitis and allergic rhinitis

134 (20, 21). In a recent study, an effect on age-related cognitive decline and a stress relief effect was  
135 reported with several strains of this species (22). *Lactobacillus acidophilus* (*L. acidophilus*) is  
136 another representative probiotic strain. This strain lowers cholesterol levels and has beneficial  
137 health effects such as antibacterial effects against harmful bacteria like *Streptococcus mutans* and  
138 *Salmonella typhimurium* (23, 24).

139 In this study, we aimed to present a new strain that has an enhancing effect on cognitive  
140 ability through the brain-gut axis and provide an additional understanding of the brain-gut axis.  
141 Three probiotic strains, *L. acidophilus*, *Lcb. paracasei*, and *Lcb. rhamnosus*, which have  
142 previously demonstrated beneficial effects to the host as one of the gut-microbiome strains, were  
143 used to confirm their positive effects on cognitive ability. Full 16S and 23S rRNA sequencing  
144 was performed to annotate the gut microbiome at a species level for downstream analysis. We  
145 expect our results to provide an understanding of the role of the gut microbiome.

146

## 147 **Results**

### 148 **Bacterial and animal treatments**

149 Three probiotic strains, *L. acidophilus* EG004, *Lcb. paracasei* EG005, and *Lcb. rhamnosus*  
150 EG006, have been identified by the molecular method. These strains were clustered with  
151 available *L. acidophilus*, *Lcb. paracasei*, and *Lcb. rhamnosus* strains, respectively, in a  
152 phylogenetic tree of 16S rRNA gene (Figure S1). Probiotic strains were consumed by mice for 8  
153 weeks with assessments of cognitive ability (Figure 1). The averages daily water intake per  
154 subject were similar between groups (Figure 2A). Daily probiotic intakes were maintained  
155 constantly and the average amount of *L. acidophilus* group, *Lcb. paracasei* group, and *Lcb.*  
156 *rhamnosus* group were calculated as  $(7.82E09 \pm 1.95E09)$ ,  $(4.37E10 \pm 5.17E09)$ , and  
157  $(3.74E10 \pm 3.98E09)$  CFUs (Figure 2B). To identify the additional effect of probiotics, the body  
158 weights of mice were measured every week (Figure 2C and S2). Patterns of weight gain in the 4  
159 groups were similar for 8 weeks. The mean body weight gains of the control group showed the  
160 highest value, which was 9.08 g. *Lcb. paracasei* group showed a significant difference from the  
161 control group with P-value under 0.05 in the second measurement, but the difference was  
162 immediately recovered. Similar to weekly weight change, statistical significance was not found  
163 in accumulated weight between experimental groups for 8 weeks.

164

### 165 **Cognitive behavioral tests**

166 Spontaneous alternation test was conducted to assess spatial learning and short-term  
167 memory. Although the average number of the total entries to each arm in *Lcb. paracasei* group

168 was slightly low, the difference between groups was not found (Figure 3A). In the comparison of  
169 the mouse ratio showed spontaneous alternation for the first 3 entries, *L. acidophilus* group  
170 showed the highest value as 75.0%. (Table S1). In spontaneous alternation, the average values of  
171 probiotics-fed groups were higher than the value of the vehicle-fed group (Figure 3B). Among  
172 the 4 experimental groups, *L. acidophilus* group showed the highest alternation ratio. Wilcoxon  
173 rank-sum test was performed to identify statistical significance, but there was no statistical  
174 difference between the experimental groups and control group.

175 Novel object recognition (NOR) test was performed to evaluate long-term and explicit  
176 memory using 4 different features (Figure 3C, 3D, and Table S1). *L. acidophilus* group exhibited  
177 the highest average ratio of mouse that touched the novel object before the familiar object,  
178 whereas *Lcb. rhamnosus* group showed the lowest value under the control group. At  
179 discrimination ratio comparison, the three probiotics-fed groups showed higher average values  
180 than the control, and *L. acidophilus* group showed the highest values. To identify if there is a  
181 significant difference, Wilcoxon rank-sum test was performed. When compared to the vehicle-  
182 fed group, *L. acidophilus* and *Lcb. Paracasei* groups displayed statistically significant  
183 differences with the adjusted P-value of 0.037. To identify animal behavior detail, the number of  
184 objects touch and the total time of object observation in each group were compared. In a  
185 comparison of object touch, statistical differences were significant in *L. acidophilus* and *Lcb.*  
186 *Paracasei* groups with P-values of 0.031 and 0.042, respectively. Also, *L. acidophilus* group had  
187 a significant difference between the time taken to observe the familiar object and the novel object.

188 Passive avoidance task was conducted to measure long-term and implicit memory. Step-  
189 through latency was used to compare the mean difference between the experimental groups.

190 Most of the subjects were transferred into a darkroom for a minute on day 1 (Figure 3E). Only 3  
191 animals took over 100 seconds to get into the darkroom. The difference between the  
192 experimental group and the control was not found on day 1. When compared to the latency time  
193 on day 1, the average latency time increased on day 2, and unexpectedly, 26 animals stayed in  
194 the light room for over 300 seconds (Figure 3F). *Lcb. rhamnosus* group presented the highest  
195 average latency time, followed by *L. acidophilus* group while the control group showed the  
196 lowest average (Table S1). The Mann-Whitney U test was conducted to check the mean  
197 difference, the P-values of *L. acidophilus* and *Lcb. rhamnosus* groups were less than 0.05  
198 compared to the control group. The adjusted P values of both groups were 0.040.

199 To assess spatial learning and long-term memory, forced alternation was conducted.  
200 Memory was evaluated by forced alternation (%), the number of arms that the mouse entered,  
201 and the percentage of mice in a group that entered the novel arm as their first entry. While the  
202 total number of the entries into each arm was diverse, there was no significant difference  
203 between the experimental groups and control (Figure 3G). *L. acidophilus* group scored the  
204 highest ratio of mice entered the novel arm as their first entry (Table S1). Forced alternation  
205 values of *L. acidophilus* and *Lcb. rhamnosus* groups were higher than the value of the control  
206 group (Figure 3H). Forced alternation of *Lcb. rhamnosus* group and the control group had a  
207 significant difference with the adjusted P-value of 0.038.

208

### 209 **Full 16S-23S rRNA sequencing and biological diversity**

210 Metagenome sequencing was performed with *L. acidophilus* and control groups, which  
211 showed the most improvement in cognitive ability. We compared the microbial composition of

212 both groups. Gut microbial component information annotated at a species level was completely  
213 constructed by sequencing the entire 16S-23S rRNA of the mouse stool (Table 1). Averagely,  
214 323870.0±84085.5 reads were generated from 10 stool samples. The total number of identified  
215 OTU was 252401.6±56284.7 in *L. acidophilus* group and 259945.6±78526.0 in the control group.  
216 The produced OTUs were annotated as a total of 528.4±90.4 species in *L. acidophilus* group and  
217 539.8±55.4 species in the control group. To check the sufficiency of the sequencing depth for the  
218 analysis, a rarefaction curve was created (Figure 4A).

219 Alpha diversity was calculated to compare species richness within a group (Figure 4B). In  
220 the comparison of the two groups, no significant difference was found in Chao1 Shannon indexes.  
221 Beta diversity was measured to compare the diversity of the microbial community between the  
222 two groups (Figure 4C and D). It was confirmed that both beta diversity evaluations (Bray-Curtis  
223 and Unifrac distance) had significant differences.

224

## 225 **Microbial composition**

226 In the comparison analysis of microbial compositions, taxonomies with significantly  
227 different ratios were found between *L. acidophilus* group and the control group. At the phylum  
228 level, Bacteroidota accounted for the highest proportion in both groups, followed by Firmicutes  
229 (Figure 4E). Significant differences between the two groups were found in 2 of the 12 phyla  
230 (Firmicutes, Proteobacteria), all of which were high in *L. acidophilus* group. At the class level,  
231 Bacteroidia showed the highest proportion in both groups. Also, the proportion of Bacilli and  
232 Gammaproteobacteria classes were increased in *L. acidophilus* group when compared to the  
233 control group (Figure S3). At the order level, Bacteroidales showed the highest percentage in



234 both groups, and Lactobacillales and Enterobacterales orders were found to exhibit higher  
235 proportions in *L. acidophilus* group. At the family level, *Muribaculaceae* showed the highest  
236 proportion in both groups. It was found that 2 **familiae** (*Lactobacillaceae* and  
237 *Enterobacteriaceae*) showed increased proportions in *L. acidophilus* group, while a decreased  
238 percentage was observed in one family (*Ruminococcaceae*). In the Genus comparison,  
239 *Muribaculum* genus showed the highest ratio in the two groups, and 12 genera showed  
240 differences between groups. Three genera showed an increased proportion in the experimental  
241 group, whereas 9 genera showed higher mean values in the control group. The genus increased in  
242 *L. acidophilus* group were *Lactobacillus*, *Staphylococcus\_A*, and *Escherichia*, whereas the  
243 genera decreased in *L. acidophilus* group were *Bacteroides\_F*, *Desulfotomaculum*,  
244 *Lachnobacterium*, *Bittarella*, *Agathobacter*, *Roseburia*, *Bariatricus*, and *Lachnospirarea*. At the  
245 Species level, *Muribaculum intestinale* was found to account for the largest proportion, with over  
246 50% in both groups. Following *M. intestinale*, the species *Lactobacillus acidophilus*,  
247 *Lactobacillus johnsonii*, *Lactobacillus\_B murinus*, and *Lactobacillus\_H reuteri* were found with  
248 a high proportion in *L. acidophilus* group, while *Lactobacillus\_B murinus*, *Bacteroides\_B*  
249 *vulgatus*, *Faecalibaculum rodentium*, and *Kineothrix alysoides* species showed a high proportion  
250 in the control group. No unique bacterial species were found in either of the two groups.  
251 Seventeen species showed differences between groups, and it was confirmed that the proportions  
252 of *L. acidophilus* and *E. flexneri* were increased in *L. acidophilus* group (Figure 4F).

253

## 254 **Functional profiling and correlation analysis**

255 Functional profiling was performed at the KEGG level 3 to estimate the effect of the

256 differential composition of intestinal microbes on the mice (Figure 5). By calculating the LDA  
257 score, it was confirmed that the two groups showed significantly different patterns in 9 categories.  
258 All nine categories were predicted to be more activated in *L. acidophilus* group. The  
259 Phosphotransferase system (PTS) scored the highest, followed by *Staphylococcus aureus*  
260 infection, Synthesis and degradation of ketone bodies.

261 To further estimate the influence of the altered gut microbiota, Spearman's correlation  
262 analysis of cognitive-behavioral abilities and bacterial OTUs, and fermentation products were  
263 performed (Figure 6). *L. acidophilus* and *E. flexneri* showed a positive correlation with all  
264 assessments of cognitive abilities, while the other 14 OTUs presented a negative correlation. In  
265 particular, step-through latency at Day 2 and Step latency difference for 2 days of the PAT results  
266 showed a significant negative correlation with the *Gemella massiliensis* ( $r = -0.8379$ ,  $p =$   
267  $0.03248$  and  $r = -0.8182$ ,  $p = 0.0376$ ) and *Desulfotomaculum nigrificans* ( $r = -0.8781$ ,  $p =$   
268  $0.01914$  and  $r = -0.8450$ ,  $p = 0.03225$ ).

269 To provide evidence to indirectly infer the mechanism of action of the gut microbiome, the  
270 concentration of SCFA in the microbial culture was measured (Table S2). Lactic acid and acetic  
271 acid were found in three microbial cultures. Lactic acid was identified in the highest  
272 concentration in *Lcb. paracasei* EG005, and acetic acid was included in the highest concentration  
273 in *L. acidophilus* EG004 culture. Propionate and butyrate were not within detectable ranges.

274

## 275 **Comparative analysis of genetic contents in bacterial whole genome sequences**

276 To identify its safety and functionality, several genetic factors were detected. Fourteen  
277 genomic islands, two prophage regions, one CRISPR region, and three bacteriocins were found

278 in the genome of *L. acidophilus* EG004. In *Lcb. paracasei* EG005, 29 genomic islands, 7  
279 prophage regions, 3 CRISPR regions, and 2 bacteriocins were detected. In the case of *Lcb.*  
280 *rhamnosus* EG006, 23 genomic islands, 8 prophage regions, 3 CRISPR regions, and 1  
281 bacteriocin were found in the genome. To estimate a genetic factor related to cognitive ability,  
282 protein annotation was conducted (Figure 7A). Protein metabolism, Carbohydrates, Amino acids  
283 and derivatives showed high proportions, but there was a difference in order by bacterial strains.  
284 Protein metabolism had the highest proportion in *L. acidophilus* EG004 and carbohydrates  
285 presented the highest proportion in *Lcb. paracasei* EG005 and *Lcb. rhamnosus* EG006. In a  
286 subcategory comparison of predicted functional sequences, a difference of genetic contents was  
287 found (Figure 7B). CDSs related to Fatty acids were found in the genomes of *Lcb. paracasei*  
288 EG005 and *Lcb. rhamnosus* EG006. Genes of 3 subcategories (Aromatic amino acids and  
289 derivatives, Alanine, serine, and glycine, and Proline and 4-hydroxyproline) were detected in *Lcb.*  
290 *rhamnosus* EG006, while genes of 3 other categories in Amino Acids in Derivatives were  
291 contained in only *L. acidophilus* EG004.

292

## 293 Discussion

294 As interest in Gut-Brain Axis has increased, many types of research in this criterion have  
295 been published. However, it is still unclear about the integral mechanism and which strain has a  
296 positive or negative effect. Therefore, we aimed to develop a new strain that has a positive effect  
297 on the host's cognition, and we found 3 strains that caused positive effects in 4 different  
298 cognitive tests (Figure 3). *Lcb. paracasei* group showed improved cognitive ability in the novel  
299 object recognition test. A previous study indicated that this bacterium prevents age-related  
300 cognitive decline and improves cognitive ability (22). Other strain, *Lcb. rhamnosus*, displayed  
301 improved cognitive ability in passive avoidance task and forced alternation test. Several studies  
302 demonstrated that *Lcb. rhamnosus* consumption could increase cognitive ability (25, 26). Similar  
303 to previous studies, we experimentally confirmed that *Lcb. paracasei* and *Lcb. rhamnosus* could  
304 enhance cognitive function. On the other hand, although it is indicated that *L. acidophilus* strain  
305 has a neuroprotective effect against traumatic brain injury, there was no experimental research  
306 related to its cognitive ability (27, 28). In our study, we identified that *L. acidophilus* group  
307 presented the highest classical measured values as well as incidental measured values in novel  
308 object recognition test and passive avoidance task. This indicates that *L. acidophilus* is capable of  
309 improving cognitive ability comparable to that of previously reported strains. Our results will  
310 help further broaden the industrial field of *L. acidophilus*. In addition, although probiotic  
311 consumptions were carried out as the same method, three experimental groups showed improved  
312 cognitive ability in different tests. It implies that different probiotic strains affect cognitive ability  
313 by different mechanisms.

314 To understand the effect of the gut microbiome on the brain as our secondary goal, we  
315 performed gut microbiome analysis of *L. acidophilus* group, which showed the best cognitive  
316 improvement, along with the control group, The difference of species richness was not found in  
317 the comparison of alpha diversity, whereas the difference was found in the comparison of beta  
318 diversity (Figure 4B, 4C, and 4D). It represents that the number of OTUs constituting the two gut  
319 microbial communities is similar, but the composition of the OTUs is different. In the  
320 comparison of the two communities, significant differences were observed at all taxonomic  
321 levels except for the bacteria kingdom, which were mostly *L. acidophilus*. Naturally, *L.*  
322 *acidophilus* group was confirmed to show a significant increase in *L. acidophilus* abundance and  
323 ultimately show a high ratio of *L. acidophilus*. This indicates that a large amount of *L.*  
324 *acidophilus* is capable of safely reaching the intestines without being affected by digestive juices  
325 such as gastric acid and pancreatic enzymes.

326 We estimated that the positive effect on cognitive ability due to the increased proportion of  
327 *L. acidophilus* in the intestines was based on two rationales: modulation of neurotransmitters and  
328 neurotrophic factors and production of SCFAs. First, *L. acidophilus* modulates several types of  
329 neurotransmitters in the intestine. Microbial-derived intermediates, which affect the brain  
330 through gut epithelial and blood-brain barriers, are such as GABA ( $\gamma$ -aminobutyric acid),  
331 glutamate, dopamine, noradrenaline, serotonin (5-Hydroxytryptamine; 5-HT), and Brain-derived  
332 neurotrophic factor (BDNF). These neurotransmitters are synthesized from various amino acids.  
333 GABA and glutamate are produced from the gut microbiome such as *Bifidobacterium* and  
334 *Lactobacillus* (29). Glutamate has a role as a neurotransmitter by itself, and it is used at GABA  
335 synthesis (30). Dopamine and Noradrenaline are synthesized from specific amino acids such as  
336 tyrosine and phenylalanine (31). L-Tryptophan is a well-known precursor of serotonin (32).

337 Therefore, altered amino acid composition by the gut microbiome seems to affect the host's  
338 neurotransmitter synthesis. In the comparison of the functional protein genes, *L. acidophilus*  
339 EG004 showed a higher composition of the gene related to amino acid metabolism, than *Lcb.*  
340 *paracasei* EG005 and *Lcb. rhamnosus* EG006 showed (Figure 7A). Changes in intestinal amino  
341 acid composition caused by ingested *L. acidophilus* may have led to differences in cognitive  
342 ability. It has been proven that *L. acidophilus* consumption produces and up-regulates  
343 neurotransmitter and neurotrophic factor including GABA and serotonin (33-36). Thus, it is  
344 estimated that increased *L. acidophilus* EG004 in the gut modulates neurotransmitters and affects  
345 the animal's nerve system. Second, SCFAs, fermentation products of *L. acidophilus*, positively  
346 apply to brain function. For example, acetate, one of the short-chain fatty acids (SCFAs),  
347 promotes the activation of the parasympathetic nervous system (37). Also, it is indicated that  
348 acetate improved cognitive ability and neurogenesis in the hippocampus with increasing BDNF  
349 and IGF-1 levels as a glatiramer acetate form (38). Likewise, butyrate, a famous HDAC inhibitor,  
350 has been used for a pharmacological purpose since lower global histone acetylation is a common  
351 phenomenon observed in many neurodegenerative diseases (39). Its therapeutic effect on  
352 neurodegenerative diseases including Parkinson's disease was verified, showing enhancement of  
353 neurotrophic factors and improvement in learning and memorizing (40). However, SCFAs are  
354 not produced until non-digestible carbohydrates reach the small intestine to be broken down by  
355 microbial metabolism, so it is not fully produced by the human digestive enzymes without  
356 specific microbes. *L. acidophilus* is a representative species that produces SCFAs through non-  
357 digestive carbohydrates, and it can be assumed that the intake of *L. acidophilus* EG004 caused  
358 the increase in SCFAs of the experimental mice's gut. The result of SCFA measurement in  
359 bacterial culture raises the possibility of this assumption (Table S2). Although it is different from

360 the metabolism in the gut since the SCFAs were measured in the medium to which glucose is the  
361 main energy source, it indirectly estimates its SCFA-producing ability. The result of functional  
362 profiling in our study also upholds this (Figure 5B). In the analysis of functional profiling,  
363 activation of genes of synthesis and degradation of ketone bodies was predicted by comparing it  
364 with control. The ketone body is one of the main fuels of the brain like lactate and butyrate,  
365 which is the main product of *L. acidophilus*, and is also capable of replacing glucose as an  
366 alternative fuel. Similar to butyrate mentioned earlier, ketone bodies modulate the brain with  
367 anti-oxidant reaction, energy supply, regulation of deacetylation activity, and regulation of the  
368 immune system. In recent studies, it is indicated that the increase of ketone body's concentration  
369 induces an alleviation effect on brain diseases such as epilepsy, Alzheimer's disease, and  
370 Parkinson's disease as well as memory improvement (41-43). Based on these evidences, ingested  
371 *L. acidophilus* EG004 in our experimental group seems to have produced SCFAs and modulated  
372 neurotransmitters, and *L. acidophilus*-derived metabolite would have raised cognitive ability.  
373 Although we did not measure microbial-derived metabolites, previous researches demonstrated  
374 that probiotic consumption leads to an increase of microbial-derived metabolites in the intestines.

375 Among detected species with the ratio difference, several species were indicated as  
376 important factors in the research of brain disease. *Adlercreutzia equolifaciens* is equol  
377 (phytoestrogen) producing bacteria, which obstructs microglial function. In previous studies, a  
378 higher ratio of *A. equolifaciens* was found in the gut of patients with Alzheimer's disease and  
379 Autism spectrum disorder (44, 45). In other studies, *Roseburia hominis* and *Bacteroides\_F*  
380 *pectinophilus* were detected with a higher ratio in the patients with Alzheimer's disease than the  
381 normal persons (46, 47). When comparing gut microbiome between the Parkinson's disease  
382 group and normal group, *Soleaferrea massiliensis* was more frequently discovered in the patient

383 group (48). Interestingly, those strains that showed a high ratio from the previous studies of brain  
384 disease patients were found to show a lower ratio in *L. acidophilus* group when compared to the  
385 control group (Figure 4F). Decreased bacterial ratio related to brain diseases seems to positively  
386 affect cognitive ability and we believe that it is due to *L. acidophilus* consumption. As  
387 antibacterial activity is the essential property of probiotics, such activity of *L. acidophilus*  
388 against harmful and pathogenic bacteria has been reported. In our previous study, we proved that  
389 *L. acidophilus* EG004 is capable of demonstrating the antimicrobial activity (49). Therefore, we  
390 suggest that the antibacterial activity of *L. acidophilus* EG004 was the potential reason for  
391 cognitive ability enhancement.

392 In functional profiling analysis, we offered explainable factors for the microbial effect on  
393 the brain. Three KEGG categories were related to toxic chemical degradation: Dioxin  
394 degradation, Xylene degradation, and Caprolactam degradation (Figure 5B). Dioxin, a  
395 neurotoxin, can raise autism and neurodegenerative disease (50, 51). Xylene inhibits normal  
396 protein synthesis of neuronal function and induces instability in the neuronal membrane. When it  
397 is inhaled, psychological deficits can be caused (52, 53). These chemicals are noxious to the  
398 brain, so activation of these chemical degradations would have diminished negative effect in *L.*  
399 *acidophilus* group. Besides, two KEGG categories related to the immune system were found.  
400 One of them is *Staphylococcus aureus* infection, which is known to cause brain abscess. Since  
401 there have been many studies demonstrating that *L. acidophilus* has antimicrobial activity against  
402 *S. aureus*, activation of this category is thought to be due to an increase in the amount of *L.*  
403 *acidophilus*. The function of renal cell carcinoma was predicted in the experimental group. As it  
404 involves not only tumor suppressor genes such as VHL, GH, and BHD, but also oncogenes such



405 as MET and PRCC-TFE3, it seems to be necessary to confirm the exact mechanism and side  
406 effects.

407 The purpose of this study was to develop a new strain that can improve cognitive ability and  
408 to provide an underlying biological mechanism affecting the brain by the gut microbiome. It is  
409 necessary to measure metabolite changes in order to provide an understanding of the mechanism  
410 of altered cognitive ability. However, altered metabolite from animal body was not fully  
411 identified. To overcome this limitation, we conducted the metagenome analysis, correlation  
412 analysis between cognitive ability and gut microbiome, measurement of SCFA producing ability,  
413 and whole-genome comparison analysis. These analyses were not covered to identification of a  
414 biological factor caused improved cognitive ability, but presented a group of genes and  
415 mechanisms that can infer the process. Although we did not provide direct evidence of phenotype  
416 changes caused by probiotics ingestion, we hope that our findings will help infer the process of  
417 the brain-gut axis.

418

## 419 **Materials and Methods**

### 420 **Animals**

421 4-week-old male C57BL/6 mice (n = 48, average weight 26g) were gained from YoungBio  
422 (Seongnam, Korea). All mice were housed in a group of four per cage under standard controlled  
423 laboratory conditions (temperature of 20±5°C, humidity of 55~60%) on a 12-h light/dark cycle  
424 (light on at 7:00 a.m.). Each group was constituted of 12 mice, and it was nurtured by  
425 distributing 4 mice to 3 cages. Twelve cages were located at random. All animals received *ad*  
426 *libitum* access to food. All animal experiments were performed following protocols approved by  
427 the Institutional Animal Care and Use Committee (IACUC) of Seoul National University, and the  
428 permission number is SNU-190607-4-3.

429

### 430 **Bacterial treatment**

431 The bacterial strains were isolated from fermented dairy foods. When identifying the brain-  
432 gut axis effect, the important factors to be considered were viability and adherence capacity.  
433 Therefore, we selected the species that are known to have adherence capacity in the GI tract, as  
434 well as the potential for gut-brain axis effect. To identify species of each strain, 16S rRNA genes  
435 were sequenced by Macrogen Inc. (Seoul, Korea) with 27F and 1492R primers. Obtained  
436 sequences were compared with sequences in the NCBI database using BLAST. The experiment  
437 was constituted with 4 groups; 3 experimental groups were fed on autoclaved tap water mixed  
438 with *L. acidophilus* EG004, *Lcb. paracasei* EG005, and *Lcb. rhamnosus* EG006, and a control  
439 group was fed on sterilized tap water. Each group consisted of 12 mice. Bacteria to delivery were

440 freshly cultivated every day. Probiotic colonies were sub-cultured into 5ml MRS broth for 8  
441 hours. After the sub-culture, 3 probiotic strains were inoculated in 500 ml MRS broth for 16  
442 hours. Cultivated cells were spun down by centrifugation **with** 4,000 rpm for 10 min. The  
443 supernatant was removed, and the pellet was suspended by 0.85 % NaCl solution. Re-suspended  
444 cells were centrifuged **by** 4,000 rpm for 10 min to remove medium ingredients. The washing  
445 process was conducted twice. Washed cells were dissolved into autoclaved tap water. The final  
446 cell concentration of vehicles was about  $1.0 \times 10^9$  CFU/ml. To estimate the probiotics amount per  
447 day per subject, daily water intake and probiotic concentration in vehicles were recorded. Cell  
448 viability of probiotics was measured by serial dilution and spreading in MRS agar plate. The  
449 probiotics amount per day per subject was calculated as an average of daily water intake per  
450 subject, by multiplying the average of daily probiotic concentration.

451

## 452 **Animal treatment**

453 The animal experiment was designed to minimize animal **stress**. All animal treatment was  
454 described in [Figure 1](#) by timeline. Four weeks old mice were allowed to habituate freely for  
455 acclimatization for 1 week. After a week, tap water and water mixed with probiotics were  
456 delivered every day. Water intake was monitored every day and body weight was measured every  
457 week. Evaluations of cognitive ability were conducted after 4 weeks **from probiotics intake**.  
458 Behavioral tests were conducted at least 2 days after the weight-measurement day to minimize  
459 the stress effect. Animals were carried to a behavioral test room to assimilate **room condition** and  
460 were allowed to relax for 6 hours before any behavioral test. In order to reduce the variance of  
461 feeding time, the experimental order of the mice was distributed evenly. All apparatus and

462 objects for the behavioral tests were cleaned with 70 % ethanol and dried after every trial to  
463 remove odors and any clues. The mice were sacrificed at the end of 13 weeks after the  
464 evaluations of the cognitive behavior. Preliminary experiments were conducted to obtain  
465 appropriate experimental values under our experimental environmental conditions. The three to  
466 five experimental conditions referring to published results were tested in our laboratory, and the  
467 experimental conditions showing a value similar to the average value of the previous studies  
468 were determined.

469

#### 470 **Y maze (Spontaneous alternation; SA)**

471 Short-term spatial memory was assessed with a Y maze apparatus. SA was used to measure  
472 rodent's **habit** to explore a new environment. The Y maze consisted of 3 identical arms that cross  
473 each other with 120° (JEUNGDO Bio & Plant Co., Ltd., Korea). Mice are laid in the middle of  
474 the Y maze facing a corner, not an arm. Each animal was allowed to freely navigate all three  
475 arms for 5 minutes and the animal's entries to any arm were recorded. An arm entry was  
476 determined as any instance when the whole body of the mouse entered the arm and navigated at  
477 least 70% of the space. The spatial memory was evaluated by spontaneous alternation, the  
478 number of arm entries, and the ratio of mice per group **entered** spontaneous alternation during the  
479 first three entries. Spontaneous alternation was calculated as shown below.

$$480 \quad \text{Spontaneous alternation [\%]} = \frac{\text{Number of spontaneous alternation}}{\text{Total number of arm entries} - 2} \times 100$$

481

#### 482 **Novel object recognition test (NOR)**

483 Based on the concept that mice tend to prefer a new object over a familiar one, a novel  
484 object recognition test (NOR test) was performed in an open field (40×40×40 cm (W×D×H),  
485 JEUNGDO Bio & Plant Co., Ltd., Korea). Two objects for this test were selected showing  
486 similar preference through the preference test. The test consisted of Sample trial (T1; 10 min),  
487 Interval time (IT; 60 min), and Novel object trial (T2; 5 min). In T1, 2 identical objects were  
488 located at 1/3 and 2/3 diagonal of the open field, respectively. The animal was laid facing the  
489 wall with the same distance to two objects, and was allowed to explore objects for 10 min. After  
490 exploration, the mouse came back to the cage and had a rest. In T2, objects were positioned at  
491 the same position as T1, but one of the objects was changed to a novel object. To measure the  
492 time taken to interact with objects, all experiment processes were recorded, and the exploration  
493 time was measured by Movavi software with 3 decimal places. It was recognized as significant  
494 only when the mouse approached facing the objects within 2.5 cm. Cases that the mouse climbed  
495 objects and individuals with exploration time less than 2 seconds were excluded. The results  
496 were presented as a discrimination ratio, the number of object touches, and the ratio of mouse  
497 that touched the novel object first before it touched the familiar object. The discrimination ratio  
498 was defined as the below equation.

499 
$$\text{Discrimination ratio [\%]} = \frac{\text{Novel object interaction time}}{\text{Novel object interaction time} + \text{Familiar object interaction time}} \times 100$$

500

### 501 **Passive avoidance task (PAT)**

502 The passive avoidance task is designed to evaluate inhibitory avoidance memory according  
503 to rodent habit that a mouse prefers dark environment naturally. Shuttle box (41×21×30 cm  
504 (W×D×H), JEUNGDO Bio & Plant Co., Ltd., Korea) is an apparatus made for the passive

505 avoidance task and consists of a bright chamber and a dark chamber which are separated by a  
506 sliding door. The floor of the chambers is made of stainless-steel grids to flow current. The test  
507 was conducted for 2 days; Acquisition (Day 1) and Test (Day 2). On day 1, a subject was put in  
508 the bright chamber facing the wall across the closed sliding door. After the mouse explored the  
509 bright chamber for 1 minute, and the moment the mouse was away from the door for over 100  
510 mm, facing the wall not the door, the door was opened so that the mouse could freely enter and  
511 move around the dark chamber. Latency time was measured until the mouse entered the dark  
512 chamber completely. The door was closed when the animal entered the dark compartment wholly  
513 including its tail, and 0.25 mA electric shock was provided to the paws by steel grid for 3  
514 seconds. To memorize the situation, the mouse was kept in the dark chamber for 30 seconds after  
515 the shock and returned to the home cage for 24 hours. On day 2, the mouse was laid again into  
516 the bright chamber. **After 1 minute for adaptation,** the sliding door was opened when the mouse  
517 faced the wall like day 1. Latency time was measured again until the mouse entered the dark  
518 chamber. If the animal rather stayed in the bright chamber for more than 300 seconds (which  
519 was the cut-off time), the experiment was completed. All experimental processes were recorded  
520 and the time was measured by the Movavi program with 3 decimal places.

521

## 522 **Y maze (Forced alternation; FA)**

523 Forced alternation was assessed with the same Y maze as described above. This test  
524 consisted of 3 phases; Training trial (T1; 5 min), Interval time (IT; 60 min), and Test trial (T2; 5  
525 min). A mouse was placed at a starting arm of Y maze facing the wall. The subject freely  
526 explored the maze during T1, while an entry was blocked with white expanded polystyrene. After

527 the learning trial, the mouse was returned to the home cage and rested for 1 hour. In T2, the  
528 mouse was again placed into the starting arm without the plate blocking the novel entry, and  
529 explored all three arms. All movements of mice were recorded through video. Forced alternation  
530 was evaluated by the ratio of time spent in the novel arm compared to the whole experimental  
531 time, **time taken** to first enter the novel arm, and the percentage of mice per group that entered  
532 the novel arm as their first entry. The case that the mouse passed at 2/3 of the arms was admitted  
533 as a valid entrance. An individual that showed no navigation of the maze or that had entered the  
534 arms less than 5 times was excluded.

535

#### 536 **Feces collection and cognitive ability evolution**

537 After all cognitive assessments had been completed, 2-3 stool samples were taken from  
538 each experimental subject. Sterilized stainless-steel tweezers were used for fecal picking,  
539 tweezers were washed with 70% alcohol and dried sufficiently before collecting new samples.  
540 The fresh samples were immediately enclosed into a 1.5ml Eppendorf tube and were put on ice.  
541 Then, it was stored at -80 degrees Celsius until used for 16S rRNA sequencing.

542 In order to determine the group that showed the best increase in cognitive ability, a score  
543 was assigned to the cognitive ability evaluation item. The items used for evaluation are  
544 spontaneous alternation, group ratio of SA, discrimination ratio, group ratio of NOR, step latency  
545 at day 2, forced alternation, and group ratio of FA ([Table S2](#)). Scores were given in ascending  
546 order of ranking (1-4 points), and the group with the highest total was selected as the group with  
547 the highest cognitive ability increase.

548

## 549 **Statistics**

550 Data were analyzed by R studio. Ineligible data were cut based on the requirements  
551 mentioned above. Data normality was assessed using the Shapiro-Wilks test and homogeneity of  
552 variance was assessed using Levene's test. Wilcoxon rank-sum test and independence t-test was  
553 used to evaluate statistical significance between experimental groups. P-values were adjusted by  
554 the FDR method for multiple testing **correction**. Statistical significance was set as P-value under  
555 0.05. All data are expressed as mean  $\pm$  SEM.

556

## 557 **Full 16S-23S rRNA sequencing**

558 To characterize the microbial community associated with measured cognitive assessment,  
559 metagenome sequencing of the 16S-23S rRNA gene was carried out by Oxford Nanopore  
560 MinION. Metagenome sequencing was performed for the control group and *L. acidophilus* group,  
561 which showed a significant difference from the control in the cognitive ability evaluation.  
562 Among the 12 stored stool samples of each group, 5 samples with sufficient amount for  
563 sequencing were selected. For library construction, gDNA was extracted from fecal samples  
564 using AccuPrep® Stool DNA extraction Kit (Bioneer, Daejeon, South Korea). To identify the  
565 quality of extracted gDNA, A260/A280 and A260/A230 absorbance were used with 0.7 %  
566 agarose gel electrophoresis. After performing quality control, selected samples were used for the  
567 library construction. Stool samples were lysed and bacterial cells were disrupted by  
568 Zirconia/Silica Beads and proteinase K. The sequencing library was prepared by 16S-26S rRNA  
569 PCR amplification with Nanopore Ligation Kit (SQK-LSK109, Nanopore, Oxford, UK)  
570 following the manufacturer's instructions. Purification and quality checks were conducted using



571 agencourt AMPure XP cleanup (Beckman Coulter, CA, USA), Quant-iT™ PicoGreen™ dsDNA  
572 Assay Kit (Invitrogen, Ireland), and 0.7% agarose gel. The PCR products were diluted and end-  
573 repaired using NEBNext FFPE Repair Mix (New England BioLabs, Ipswich, USA). The  
574 amplicon was Nick-repaired using NEBNext End repair/dA-tailing Module (New England  
575 BioLabs), prior to adapter ligation by NEBNext Quick Ligation Module (New England BioLabs).  
576 The sequencing library was loaded on primed Flongle flow cell according to Nanopore protocol.  
577 Sequencing was performed by MinION MK1b. Sequencing data was acquired by MinKNOW  
578 software (19.12.5) without live base-calling.

579

## 580 **Metagenome analysis**

581 Raw data were obtained as fast5 files. Base-calling was carried out by Guppy 4.0.11 with  
582 2,000 chunk size and 4 base callers (54). Porechop version 3 was executed for trimming adapter  
583 sequences (<https://github.com/rrwick/Porechop>). To annotate bacterial taxonomy, trimmed  
584 sequences were aligned with reference data from GTDB using Minimap2 (55). In Operational  
585 Taxonomic Unit (OTU) identification, only results with more than 2,500 matching bases and  
586 more than 3,500 bases including gaps in mapping were used. To normalize abundance data, the  
587 TMM (The trimmed mean of M-values) method was used by the edgeR package of R software  
588 (56). To characterize each group, biological diversity was calculated through the physeq package  
589 of R software (57). A rarefaction curve was constructed to check the saturation of genome  
590 sequencing. To compare species richness, alpha diversity was calculated as chao1 and Shannon  
591 indexes. To compare between groups, beta diversity was calculated using Bray-Curtis  
592 dissimilarity and Unifrac distance. P-value was calculated by the Adonis test. For detection of

593 unequal features, Wilcoxon rank-sum test was performed in each taxonomic level with 0.95  
594 confidence level. To compare functional profile, PICRUSt2 was performed (58). Correlation  
595 between cognitive ability and bacterial OTUs was inferred by Spearman's rank correlation  
596 analysis. P values were adjusted by FDR method.

597

### 598 **SCFA identification in bacterial culture**

599 To identify the amount of short-chain fatty acids (SCFAs), high-performance liquid  
600 chromatography (HPLC) was performed using Ultimate3000 (Thermo Dionex, USA) and  
601 Aminex 87H column (300x10mm, Bio-Rad, USA). Bacterial cultures of EG004, EG005, and  
602 EG006 were inoculated for 24 hours. After cultivation, the samples were filtered with 0.45  $\mu\text{m}$  of  
603 a membrane filter. The filtered sample of 10 $\mu\text{L}$  was injected into the HPLC.

604

### 605 **Whole-genome sequencing and assembly of EG005 and EG006**

606 To identify probiotic safety and potential secondary metabolite producing ability, whole-  
607 genome sequencing of *Lcb. paracasei* EG005 and *Lcb. rhamnosus* EG006 was performed. For  
608 library construction, DNA was extracted from cultured bacterial cells. After performing quality  
609 control, gDNA was used for the library construction. Bacterial cells were lysed by lysozyme for  
610 gram-positive bacteria, and removed RNA and protein to isolate DNA. Quality control for gDNA  
611 was conducted by 260/280, 260/230 absorbance with 0.8% agarose gel. Genomic DNA was  
612 fragmented to a target length of 20Kb using g-Tube (Covaris, MA, USA) and Short DNA  
613 fragments <5 kb are depleted by SRE (Circulomics, MD, USA). The fragments were End-  
614 prepared, Nick-Repaired, and then ligated with Nanopore adapter. After every enzyme reaction,

615 the DNA samples were purified using AMPure XP beads (Beckman Coulter, CA, USA) and QC  
616 with Quant-iT™ PicoGreen™ dsDNA Assay Kit. The sequencing library was loaded on primed  
617 Flongle flow cell according to Nanopore protocol. Sequencing was performed on a MinION by  
618 MinKNOW software.

619 Base-calling from raw data was conducted by Guppy Basecaller v4.0.15 with filtering with  
620 an average basecall Phred quality score. Adapter sequences were trimmed by PoreChop v0.2.4.  
621 Genome assembly was conducted by Canu. Assembled contigs were polished by Nanopolish and  
622 racon, and pilon. Circlator circularized each contig and detect replication origin. Assembled  
623 contig was assessed by BUSCO 3.0.2. The complete sequence of *L. acidophilus* EG004 that is  
624 deposited in the NCBI database with accession number PRJNA657145 was used.

625

## 626 **Comparative analysis of bacterial genome sequences**

627 To check safety and functionality as probiotics, genetic factors were identified by whole-  
628 genome sequences. Virulence factor and prophage gene were detected by VirulenceFinder 2.0  
629 and PHASTER, respectively. IslandViewer4 identified genomic island and crisprfinder searched  
630 CRISPR region. Bacteriocin detection was conducted by BAGLE4. To compare functional gene  
631 contents, protein prediction was performed by the RAST server. Predicted protein sequences  
632 were classified by the SEED system. Categorized protein sequences showed as the proportion in  
633 the total predicted sequences.

634

635 **References**

636 1. Sender R, Fuchs S, Milo RJPb. 2016. Revised estimates for the number of human and bacteria  
637 cells in the body. 14:e1002533.

638 2. Turnbaugh PJ, Ley RE, Mahowald MA, Magrini V, Mardis ER, Gordon JIJn. 2006. An obesity-  
639 associated gut microbiome with increased capacity for energy harvest. 444:1027-1031.

640 3. Zhang Z, Tang H, Chen P, Xie H, Tao YJSt, therapy t. 2019. Demystifying the manipulation of  
641 host immunity, metabolism, and extraintestinal tumors by the gut microbiome. 4:1-34.

642 4. Ghaisas S, Maher J, Kanthasamy AJP, therapeutics. 2016. Gut microbiome in health and disease:  
643 Linking the microbiome–gut–brain axis and environmental factors in the pathogenesis of  
644 systemic and neurodegenerative diseases. 158:52-62.

645 5. Mayer EA, Savidge T, Shulman RJJG. 2014. Brain–gut microbiome interactions and functional  
646 bowel disorders. 146:1500-1512.

647 6. Martin CR, Osadchiy V, Kalani A, Mayer EAJC, gastroenterology m, hepatology. 2018. The  
648 brain-gut-microbiome axis. 6:133-148.

649 7. Pulikkan J, Maji A, Dhakan DB, Saxena R, Mohan B, Anto MM, Agarwal N, Grace T, Sharma  
650 VKJMe. 2018. Gut microbial dysbiosis in Indian children with autism spectrum disorders.  
651 76:1102-1114.

652 8. Hill-Burns EM, Debelius JW, Morton JT, Wissemann WT, Lewis MR, Wallen ZD, Peddada SD,  
653 Factor SA, Molho E, Zabetian CPJMD. 2017. Parkinson's disease and Parkinson's disease  
654 medications have distinct signatures of the gut microbiome. 32:739-749.

655 9. Singhrao SK, Harding AJEroa-it. 2020. Is Alzheimer's disease a polymicrobial host microbiome  
656 dysbiosis? 18:275-277.

657 10. Martin-Gallausiaux C, Marinelli L, Blottière HM, Larraufie P, Lapaque NJPotNS. 2021. SCFA:  
658 mechanisms and functional importance in the gut. 80:37-49.

659 11. Schwartz A, Taras D, Schäfer K, Beijer S, Bos NA, Donus C, Hardt PDJO. 2010. Microbiota and  
660 SCFA in lean and overweight healthy subjects. 18:190-195.

661 12. Kaur H, Bose C, Mande SSJFin. 2019. Tryptophan metabolism by gut microbiome and gut-  
662 brain-axis: an in silico analysis. 13:1365.

663 13. Miettinen M, Vuopio-Varkila J, Varkila KJI, immunity. 1996. Production of human tumor  
664 necrosis factor alpha, interleukin-6, and interleukin-10 is induced by lactic acid bacteria.  
665 64:5403-5405.

666 14. Wall R, Marques TM, O'Sullivan O, Ross RP, Shanahan F, Quigley EM, Dinan TG, Kiely B,  
667 Fitzgerald GF, Cotter PDJTAjocn. 2012. Contrasting effects of *Bifidobacterium breve* NCIMB  
668 702258 and *Bifidobacterium breve* DPC 6330 on the composition of murine brain fatty acids  
669 and gut microbiota. 95:1278-1287.

- 670 15. Sanders MEJ*Cid*. 2008. Probiotics: definition, sources, selection, and uses. 46:S58-S61.
- 671 16. Österlund P, Ruotsalainen T, Korpela R, Saxelin M, Ollus A, Valta P, Kouri M, Elomaa I, Joensuu  
672 HJB*Joc*. 2007. Lactobacillus supplementation for diarrhoea related to chemotherapy of  
673 colorectal cancer: a randomised study. 97:1028-1034.
- 674 17. Szajewska H, Guarino A, Hojsak I, Indrio F, Kolacek S, Shamir R, Vandenplas Y, Weizman  
675 ZJJ*opg, nutrition*. 2014. Use of probiotics for management of acute gastroenteritis: a position  
676 paper by the ESPGHAN Working Group for Probiotics and Prebiotics. 58:531-539.
- 677 18. Hoang BX, Shaw G, Pham P, Levine SAJ*I, Targets A-D*. 2010. Lactobacillus rhamnosus cell lysate  
678 in the management of resistant childhood atopic eczema. 9:192-196.
- 679 19. McVey Neufeld K-A, O'Mahony SM, Hoban AE, Waworuntu RV, Berg BM, Dinan TG, Cryan  
680 JFJ*Nn*. 2019. Neurobehavioural effects of Lactobacillus rhamnosus GG alone and in  
681 combination with prebiotics polydextrose and galactooligosaccharide in male rats exposed to  
682 early-life stress. 22:425-434.
- 683 20. Ghouri YA, Richards DM, Rahimi EF, Krill JT, Jelinek KA, DuPont AWJ*C, gastroenterology e*.  
684 2014. Systematic review of randomized controlled trials of probiotics, prebiotics, and  
685 synbiotics in inflammatory bowel disease. 7:473.
- 686 21. Güvenç IA, Muluk NB, Mutlu FŞ, Eşki E, Altıntoprak N, Oktemer T, Cingi CJA*Jor, allergy*. 2016.  
687 Do probiotics have a role in the treatment of allergic rhinitis? A comprehensive systematic  
688 review and Metaanalysis. 30:e157-e175.
- 689 22. Corpuz HM, Ichikawa S, Arimura M, Mihara T, Kumagai T, Mitani T, Nakamura S, Katayama SJ*N*.  
690 2018. Long-term diet supplementation with Lactobacillus paracasei K71 prevents age-related  
691 cognitive decline in senescence-accelerated mouse prone 8. 10:762.
- 692 23. Tahmourespour A, Salehi R, Kermanshahi RKJBJoM. 2011. Lactobacillus acidophilus-derived  
693 biosurfactant effect on gtfB and gtfC expression level in Streptococcus mutans biofilm cells.  
694 42:330-339.
- 695 24. Coconnier M-H, Liévin V, Bernet-Camard M-F, Hudault S, Servin ALJA*Aa, chemotherapy*. 1997.  
696 Antibacterial effect of the adhering human Lactobacillus acidophilus strain LB. 41:1046-1052.
- 697 25. Huang S-Y, Chen L-H, Wang M-F, Hsu C-C, Chan C-H, Li J-X, Huang H-YJ*N*. 2018. Lactobacillus  
698 paracasei PS23 delays progression of age-related cognitive decline in senescence accelerated  
699 mouse prone 8 (SAMP8) mice. 10:894.
- 700 26. Wang S, Ahmadi S, Nagpal R, Jain S, Mishra SP, Kavanagh K, Zhu X, Wang Z, McClain DA,  
701 Kritchevsky SBJG. 2020. Lipoteichoic acid from the cell wall of a heat killed Lactobacillus  
702 paracasei D3-5 ameliorates aging-related leaky gut, inflammation and improves physical and  
703 cognitive functions: from C. elegans to mice. 42:333-352.
- 704 27. Oh NS, Joung JY, Lee JY, Song JG, Oh S, Kim Y, Kim HW, Kim SHJGm. 2020. Glycated milk  
705 protein fermented with Lactobacillus rhamnosus ameliorates the cognitive health of mice

- 706 under mild-stress condition. 11:1643-1661.
- 707 28. Kelly JR, Allen AP, Temko A, Hutch W, Kennedy PJ, Farid N, Murphy E, Boylan G, Bienenstock J,  
708 Cryan JFJB, behavior,, immunity. 2017. Lost in translation? The potential psychobiotic  
709 *Lactobacillus rhamnosus* (JB-1) fails to modulate stress or cognitive performance in healthy  
710 male subjects. 61:50-59.
- 711 29. Yunes R, Poluektova E, Dyachkova M, Klimina K, Kovtun A, Averina O, Orlova V, Danilenko VJA.  
712 2016. GABA production and structure of *gadB/gadC* genes in *Lactobacillus* and  
713 *Bifidobacterium* strains from human microbiota. 42:197-204.
- 714 30. Walls AB, Waagepetersen HS, Bak LK, Schousboe A, Sonnewald UJNr. 2015. The glutamine–  
715 glutamate/GABA cycle: function, regional differences in glutamate and GABA production and  
716 effects of interference with GABA metabolism. 40:402-409.
- 717 31. Lehnert H, Wurtman RJP, psychosomatics. 1993. Amino acid control of neurotransmitter  
718 synthesis and release: physiological and clinical implications. 60:18-32.
- 719 32. O'Mahony SM, Clarke G, Borre Y, Dinan T, Cryan JJBbr. 2015. Serotonin, tryptophan  
720 metabolism and the brain-gut-microbiome axis. 277:32-48.
- 721 33. Lim S-D, Kim K-S, Do J-RJFSOAR. 2009. Physiological characteristics and GABA production of  
722 *Lactobacillus acidophilus* RMK567 isolated from raw milk. 29:15-23.
- 723 34. Lim S-D, Yoo S-H, Yang H-D, Kim S-K, Park S-YJFSOAR. 2009. GABA productivity in yoghurt  
724 fermented by freeze dried culture preparations of *Lactobacillus acidophilus* RMK567. 29:437-  
725 444.
- 726 35. Cao Y-N, Feng L-J, Wang B-M, Jiang K, Li S, Xu X, Wang W-Q, Zhao J-W, Wang Y-  
727 MJSjogojotSGA. 2018. *Lactobacillus acidophilus* and *Bifidobacterium longum* supernatants  
728 upregulate the serotonin transporter expression in intestinal epithelial cells. 24:59.
- 729 36. Rahimlou M, Hosseini SA, Majdinasab N, Haghhighizadeh MH, Husain DJNN. 2020. Effects of  
730 long-term administration of Multi-Strain Probiotic on circulating levels of BDNF, NGF, IL-6 and  
731 mental health in patients with multiple sclerosis: a randomized, double-blind, placebo-  
732 controlled trial.1-12.
- 733 37. Perry RJ, Peng L, Barry NA, Cline GW, Zhang D, Cardone RL, Petersen KF, Kibbey RG, Goodman  
734 AL, Shulman GIJN. 2016. Acetate mediates a microbiome–brain– $\beta$ -cell axis to promote  
735 metabolic syndrome. 534:213-217.
- 736 38. He F, Zou J-T, Zhou Q-F, Niu D-L, Jia W-HJJon. 2014. Glatiramer acetate reverses cognitive  
737 deficits from cranial-irradiated rat by inducing hippocampal neurogenesis. 271:1-7.
- 738 39. Bourassa MW, Alim I, Bultman SJ, Ratan RRJNl. 2016. Butyrate, neuroepigenetics and the gut  
739 microbiome: can a high fiber diet improve brain health? 625:56-63.
- 740 40. Barichello T, Generoso JS, Simões LR, Faller CJ, Ceretta RA, Petronilho F, Lopes-Borges J,  
741 Valvassori SS, Quevedo JJMn. 2015. Sodium butyrate prevents memory impairment by re-

742 establishing BDNF and GDNF expression in experimental pneumococcal meningitis. 52:734-  
743 740.

744 41. Norwitz NG, Hu MT, Clarke KJFin. 2019. The mechanisms by which the ketone body D- $\beta$ -  
745 hydroxybutyrate may improve the multiple cellular pathologies of Parkinson's disease. 6:63.

746 42. Hertz L, Chen Y, Waagepetersen HSJJon. 2015. Effects of ketone bodies in Alzheimer's disease  
747 in relation to neural hypometabolism,  $\beta$ -amyloid toxicity, and astrocyte function. 134:7-20.

748 43. Klein P, Janousek J, Barber A, Weissberger RJE, Behavior. 2010. Ketogenic diet treatment in  
749 adults with refractory epilepsy. 19:575-579.

750 44. Zhang Y, Ma C, Zhao J, Xu H, Hou Q, Zhang HJO. 2017. Lactobacillus casei Zhang and vitamin  
751 K2 prevent intestinal tumorigenesis in mice via adiponectin-elevated different signaling  
752 pathways. 8:24719.

753 45. Laue HE, Korrick SA, Baker ER, Karagas MR, Madan JCJSr. 2020. Prospective associations of the  
754 infant gut microbiome and microbial function with social behaviors related to autism at age 3  
755 years. 10:1-11.

756 46. Haran JP, Bhattarai SK, Foley SE, Dutta P, Ward DV, Bucci V, McCormick BAJM. 2019.  
757 Alzheimer's disease microbiome is associated with dysregulation of the anti-inflammatory P-  
758 glycoprotein pathway. 10.

759 47. Wang J, Lei X, Xie Z, Zhang X, Cheng X, Zhou W, Zhang YJA. 2019. CA-30, an oligosaccharide  
760 fraction derived from Liuwei Dihuang decoction, ameliorates cognitive deterioration via the  
761 intestinal microbiome in the senescence-accelerated mouse prone 8 strain. 11:3463.

762 48. Petrov V, Alifirova V, Saltykova I, Zhukova I, Zhukova N, Dorofeeva YB, Tyakht A, Altukhov I,  
763 Kostryukova E, Titova MJBOSM. 2017. Comparison study of gut microbiota in case of  
764 Parkinson's disease and other neurological disorders. 15:113-125.

765 49. Kim J, Kim H, Jeon S, Jo J, Kim Y, Kim HJAS. 2020. Synergistic Antibacterial Effects of Probiotic  
766 Lactic Acid Bacteria with Curcuma longa Rhizome Extract as Synbiotic against Cutibacterium  
767 acnes. 10:8955.

768 50. Ames J, Warner M, Brambilla P, Mocarelli P, Satariano WA, Eskenazi BJE. 2018. Neurocognitive  
769 and physical functioning in the Seveso Women's Health Study. 162:55-62.

770 51. Guo Z, Xie HQ, Zhang P, Luo Y, Xu T, Liu Y, Fu H, Xu L, Valsami-Jones E, Boksa PJEi. 2018.  
771 Dioxins as potential risk factors for autism spectrum disorder. 121:906-915.

772 52. Kandyala R, Raghavendra SPC, Rajasekharan STJJoo, JOMFP mp. 2010. Xylene: An overview of  
773 its health hazards and preventive measures. 14:1.

774 53. Savolainen H, Pfäffli PJAot. 1980. Dose-dependent neurochemical changes during short-term  
775 inhalation exposure to m-xylene. 45:117-122.

776 54. Wick RR, Judd LM, Holt KEJGb. 2019. Performance of neural network basecalling tools for  
777 Oxford Nanopore sequencing. 20:1-10.

778 55. Li HJB. 2018. Minimap2: pairwise alignment for nucleotide sequences. 34:3094-3100.  
779 56. Chen Y, McCarthy D, Robinson M, Smyth GKJBUsgAohwboprbeidep. 2014. edgeR: differential  
780 expression analysis of digital gene expression data User's Guide.  
781 57. McMurdie PJ, Holmes SJPo. 2013. phyloseq: an R package for reproducible interactive analysis  
782 and graphics of microbiome census data. 8:e61217.  
783 58. Douglas GM, Maffei VJ, Zaneveld J, Yurgel SN, Brown JR, Taylor CM, Huttenhower C, Langille  
784 MGJB. 2020. PICRUSt2: An improved and customizable approach for metagenome  
785 inference.672295.  
786  
787



788 **Tables**789 **Table 1. Metagenomic sequencing statistic of *L. acidophilus* group and control**

|                 | The number of samples | Total number of reads | Estimated base (Mb) | N50      | Total number of counts | Total number of OTUs |
|-----------------|-----------------------|-----------------------|---------------------|----------|------------------------|----------------------|
| LA <sup>a</sup> | 5                     | 312,384±31,887        | 1,434±143           | 4,872±90 | 252401.6±25,171        | 528.4±40             |
| W <sup>b</sup>  | 5                     | 335,356±45,814        | 1,485.6±215         | 4,748±40 | 259945.6±35,117        | 539.8±25             |
| Total           | 10                    | 323,870±37,604        | 1,459.8±173         | 4810±72  | 256173.6±28,860        | 534.1±32             |

790 <sup>a</sup>: *L. acidophilus* group, <sup>b</sup>: control group. There was no significant difference between groups. All  
791 values were presented as average ± standard error of the mean. Fecal samples compiled after 8  
792 weeks of probiotic ingestion were used for metagenome sequencing.

793

794 **Figure legends**

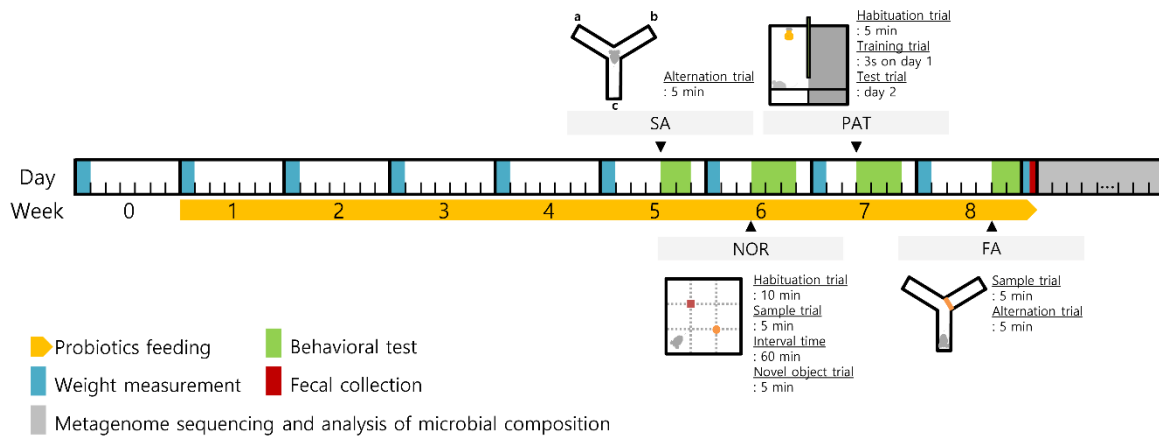

795 **Figure 1. Schematic diagram of the study to discover a new probiotic strain with improved**  
 796 **cognitive ability**  
 797

798 The diagram displays the experimental schedule by day and week for identifying probiotic strain  
 799 with improved cognitive ability. Cognitive ability was measured once a week by four behavioral  
 800 tests. The diagram of each experiment shows the first position of the animal.

801

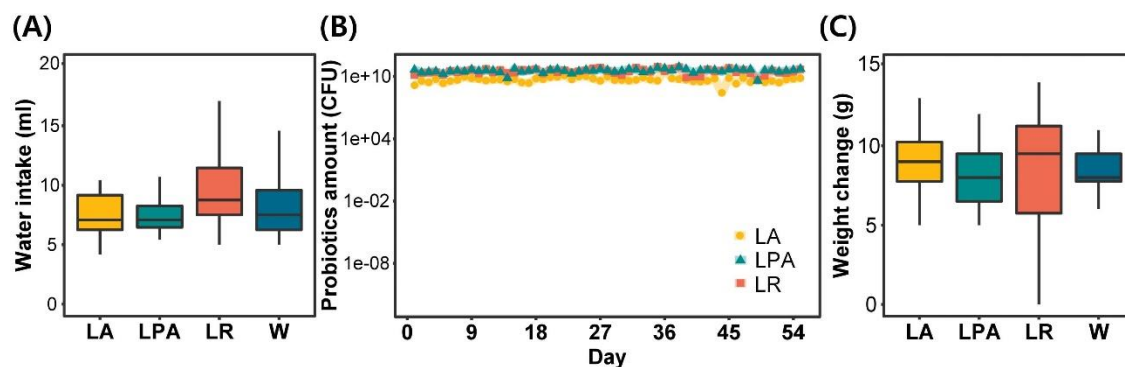

802

803 **Figure 2. Measurement of additional effect after probiotic consumption**

804 Experimental groups are expressed in abbreviations. LA: *L. acidophilus* group, LPA: *Lcb.*

805 *Paracasei* group, LR: *Lcb. Rhamnosus* group, and W: tap water-fed group (control). (A) The

806 average daily water intake. All groups showed a similar average. (B) The change of daily intaken

807 probiotic amount by timeline. *L. acidophilus* was ingested in smaller amounts compared to the

808 other two strains. (C) The average body weight change for 8 weeks. All groups showed similar

809 averages.

810

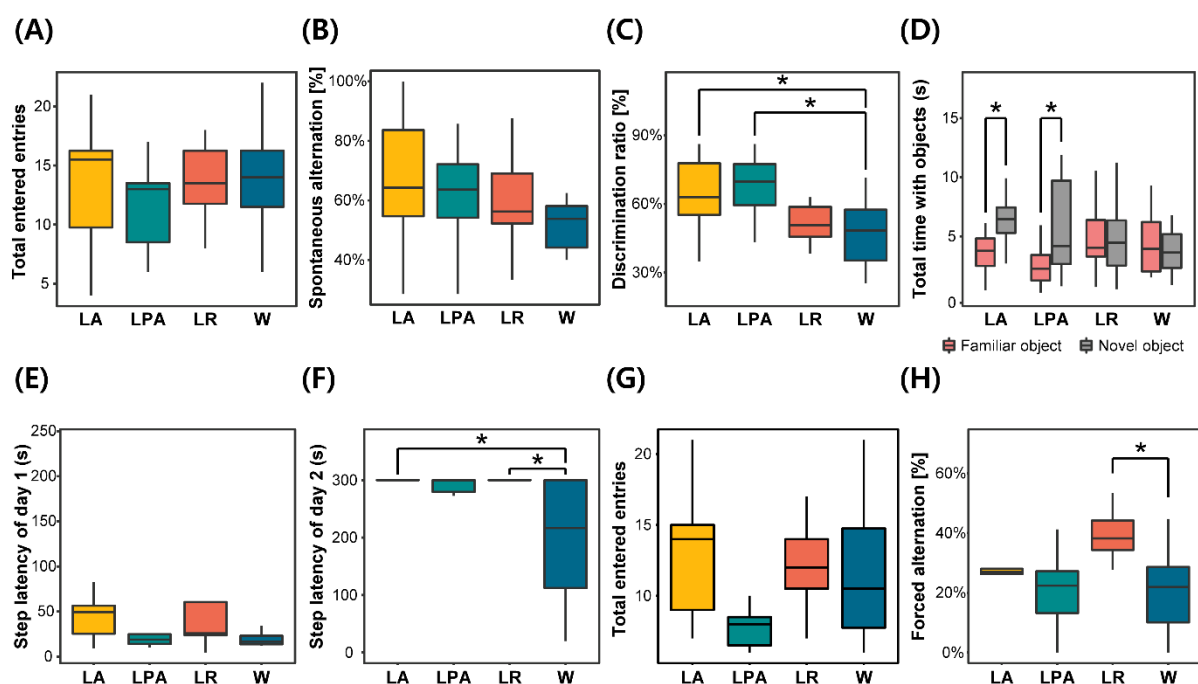

811

812 **Figure 3. Results of cognitive behavioral tests**

813 Experimental groups are expressed in abbreviations. LA: *L. acidophilus* group, LPA: *Lcb.*

814 *Paracasei* group, LR: *Lcb. rhamnosus* group, and W: the group fed on tap water (control). (A)

815 Total arm entries during spontaneous alternation test. (B) Spontaneous alternation. This is the

816 representative value of spontaneous alternation test. (C) Discrimination ratio. It is the

817 representative value of the novel object recognition test. (D) Comparison of the total time to

818 observe two objects. (E) Step-through latency of day 1. (F) Step-through latency of day 2. This is

819 the representative result of the passive avoidance task. (G) Total arm entries during forced

820 alternation test. (H) Forced alternation. This result is a representative value of forced alternation.

821 All comparison of average between experimental groups was measured by Wilcoxon rank-sum

822 test. Significant difference is presented with symbol (Adjusted P-value\* < 0.05).

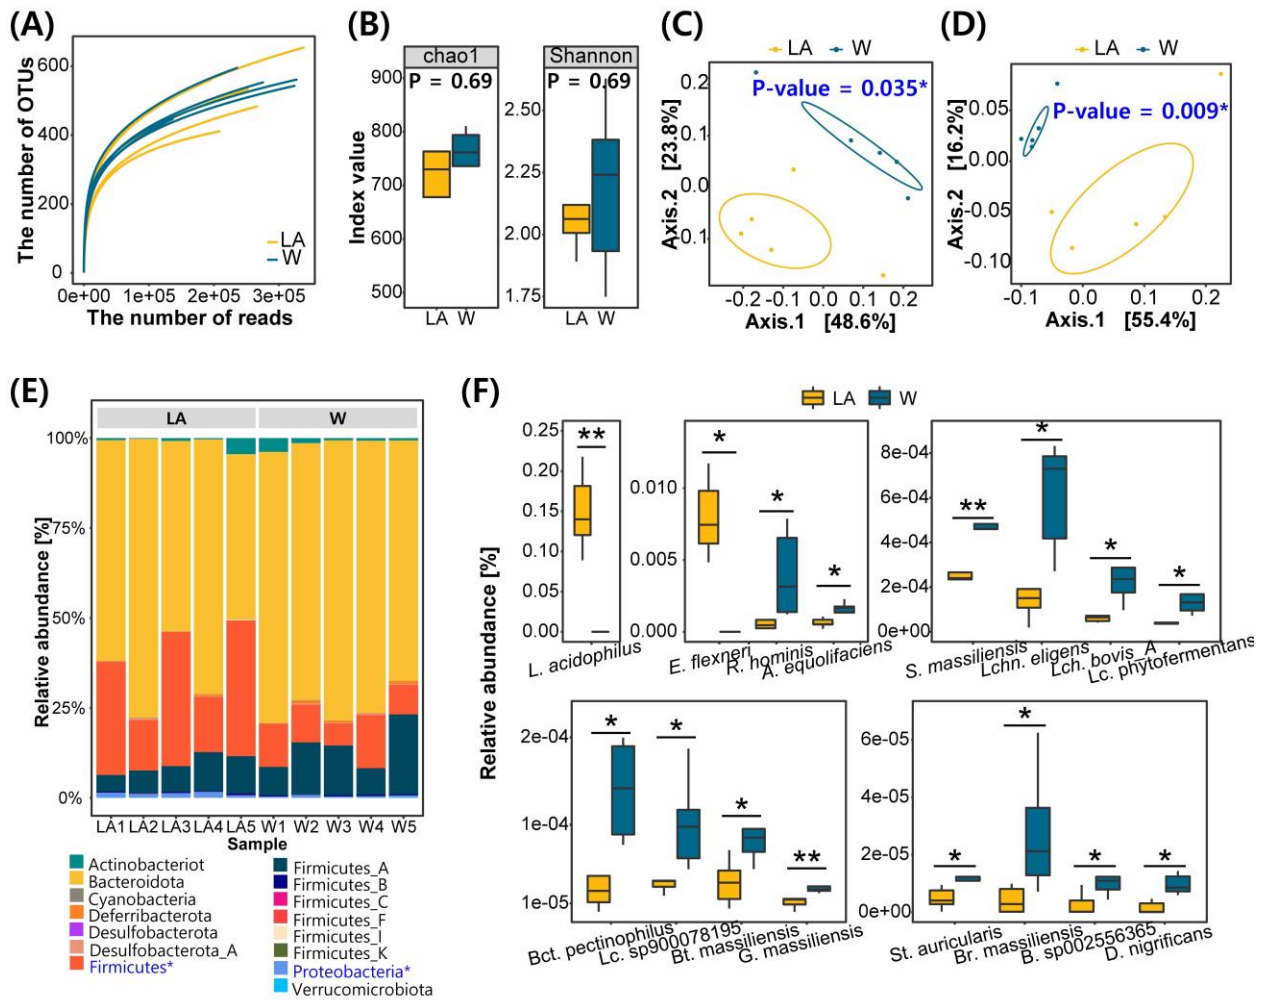

823

824 **Figure 4. Results of metagenomics sequencing**

825 Experimental groups are expressed in abbreviations. LA: *L. acidophilus* group and W: the group

826 fed on tap water (control). (A) Rarefaction curve of metagenome sequencing. (B) Alpha-diversity

827 of the *L. acidophilus* group and control. (C) Beta-diversity using Bray-Cutis distance between

828 the *L. acidophilus* group and control. (D) Beta-diversity using Unifrac distance between both

829 groups. (E) Comparison of microbial composition at the phylum level. The blue-colored phylum

830 with the (\*) symbol showed a significant difference compared to the two experimental groups. (F)

831 Comparison of microbial composition at the species level. *L. acidophilus*: *Lactobacillus*

832 *acidophilus*, E. flexneri: *Escherichia flexneri*, R. hominis: *Roseburia hominis*, A. equolifaciens:  
833 *Adlercreutzia equolifaciens*, S. massiliensis: *Soleaferrea massiliensis*, Lchn. Eligens:  
834 *Lachnospira eligens*, Lch. Bovis\_A: *Lachnobacterium bovis\_A*, Lc. Phytofermentans:  
835 *Lachnoclostridium phytofermentans*, Bct. Pectinophilus: *Bacteroides\_F pectinophilus*, Lc.  
836 Sp900078195: *Lachnoclostridium sp900078195*, Bt. Massiliensis: *Bittarella massiliensis*, G.  
837 massiliensis: *Gemella massiliensis*, St. auricularis: *Staphylococcus auricularis*, Br. Massiliensis:  
838 *Bariatricus massiliensis*, B. sp002556365: *Bacillus\_AW sp002556365*, D. nigrificans:  
839 *Desulfotomaculum nigrificans*. All comparisons of average between experimental groups were  
840 measured by independence t-test. Significant difference is presented with symbol (Adjusted P-  
841 value\* < 0.05, P-value\*\* < 0.01).

842

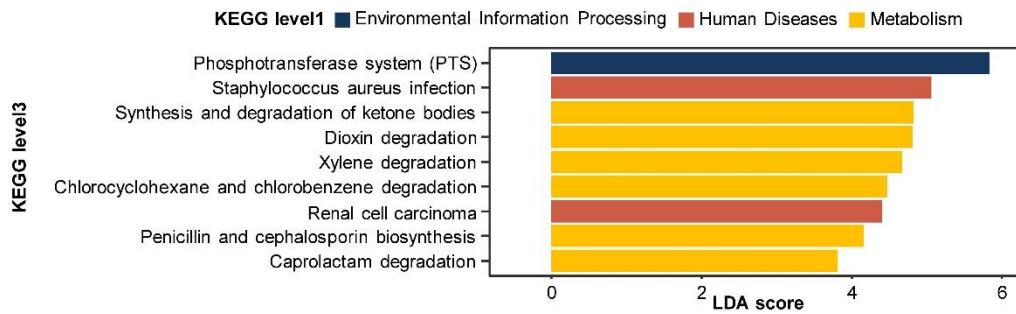

843

844 **Figure 5. Results of functional profiling**

845 Predictive functional profiling of microbiome. All predicted functions have a positive LDA score

846 for the *L. acidophilus.* group

847

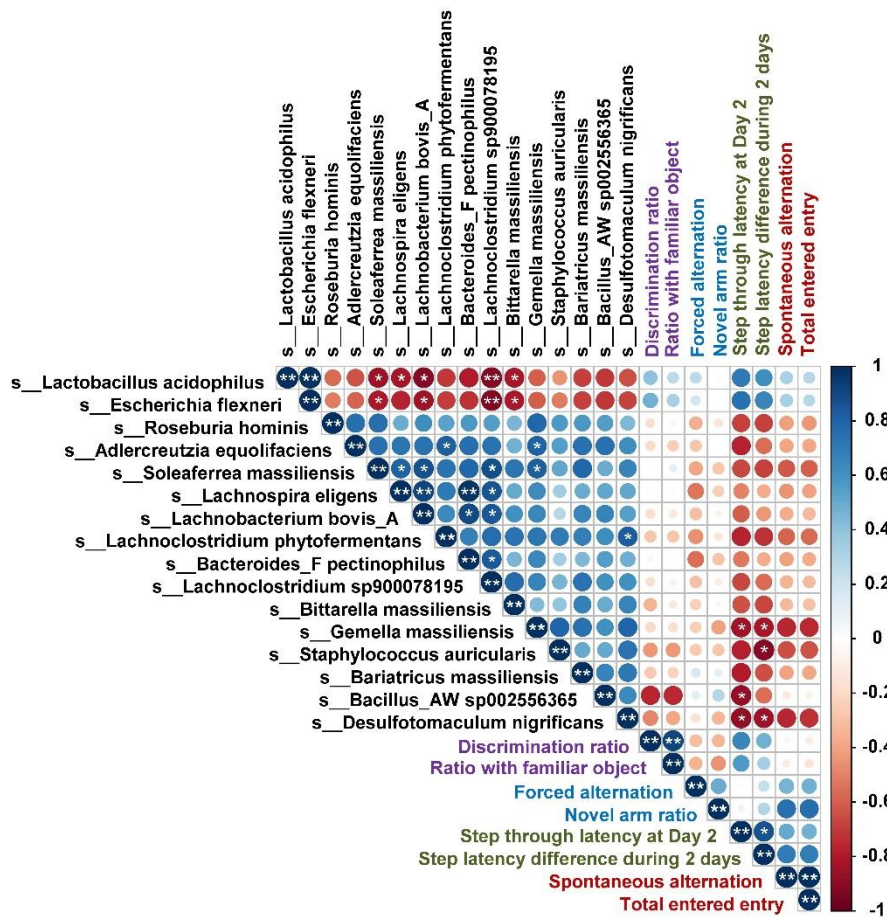

848

849 **Figure 6. Spearman's rank correlation analysis**

850 Correlation analysis was conducted to detect association among bacterial OTUs, measured  
 851 cognitive abilities, and fermentation products. The color intensity and circle size show the  
 852 strength of the correlation. Red color represents a negative correlation, and blue color is a  
 853 positive correlation. Only circles with adjusted P-value under 0.01 are illustrated in the matrix.  
 854 Results of cognitive ability evaluation were classified by 4 colors: NOR (purple), FA (blue), PAT  
 855 (deep green), and SA (brown). Significant P values indicated by the symbol \* ( $<0.05$ ) and \*\*  
 856 ( $<0.01$ ).

857



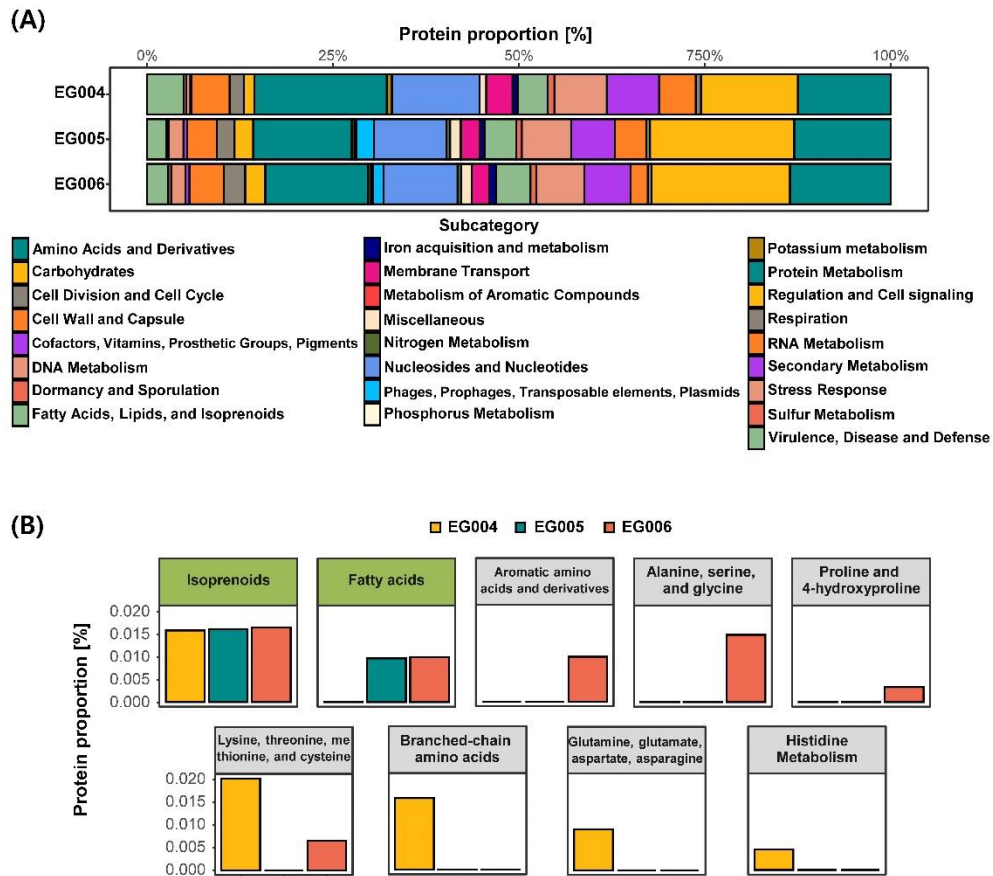

858

859 **Figure 7. Genomic comparison of 3 probiotic strains**

860 (A) Functional classification of protein coding sequences. All predicted protein sequences were  
 861 classified by categories by SEED system. (B) Subcategories in [Fatty Acids, Lipids, and  
 862 Isoprenoids] and [Amino Acids and Derivatives]. [Fatty Acids, Lipids, and Isoprenoids]  
 863 subcategory showed yellow-green colored head and [Amino Acids and Derivatives] category  
 864 presented light gray colored head.

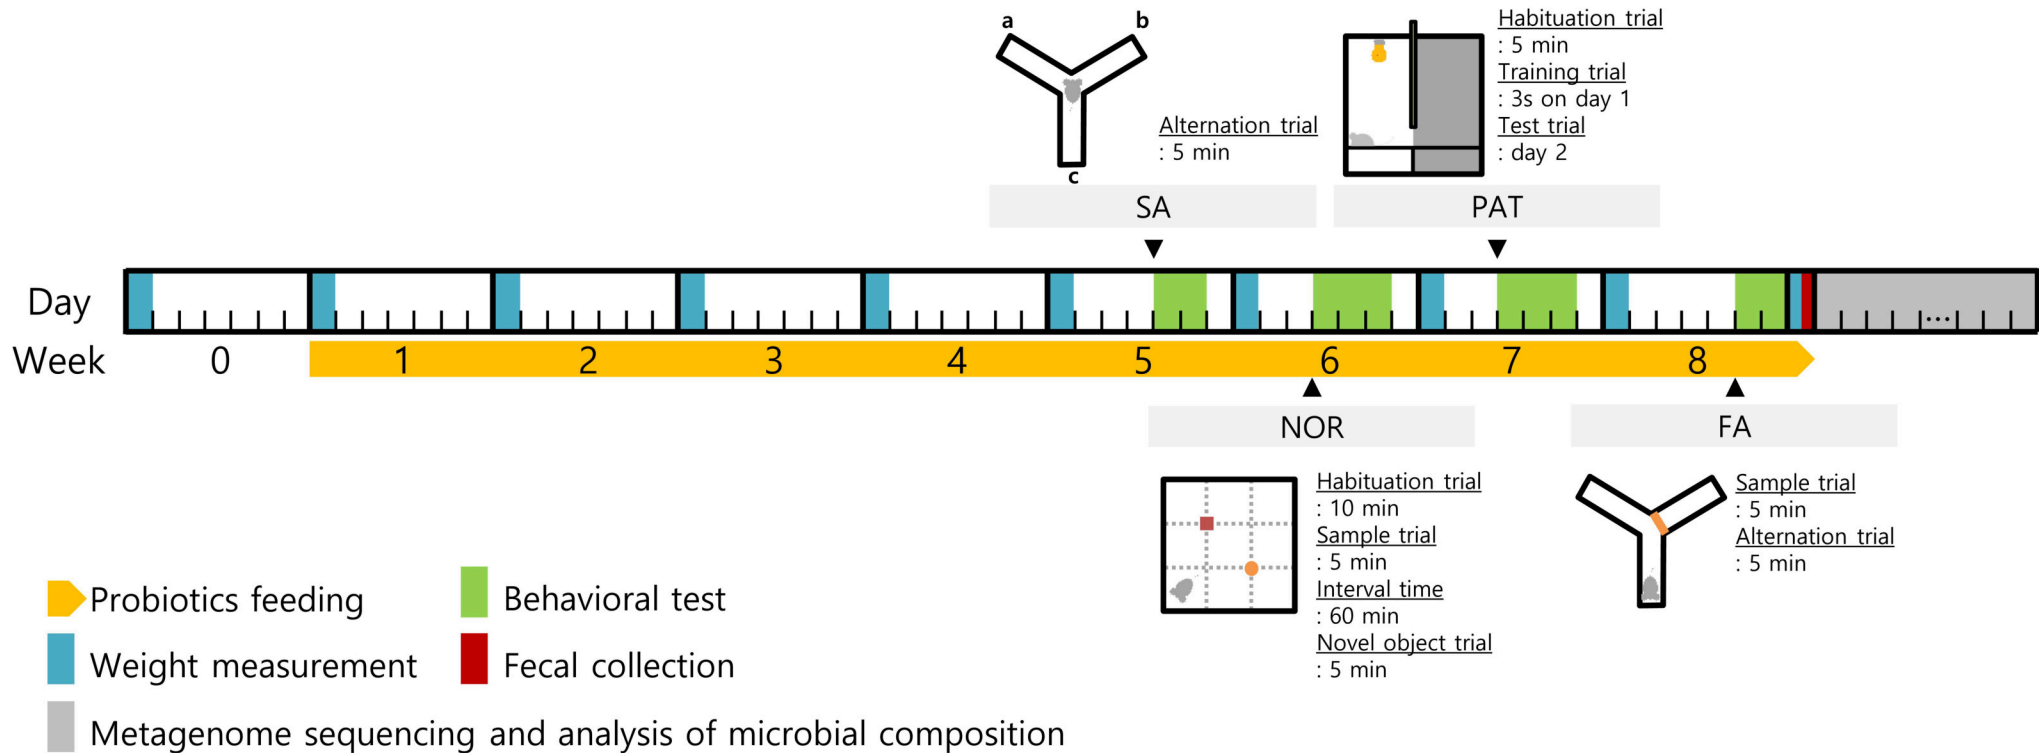

**(A)**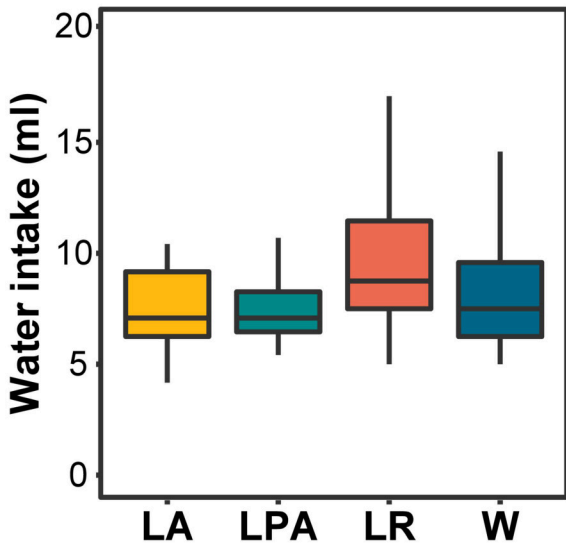**(B)**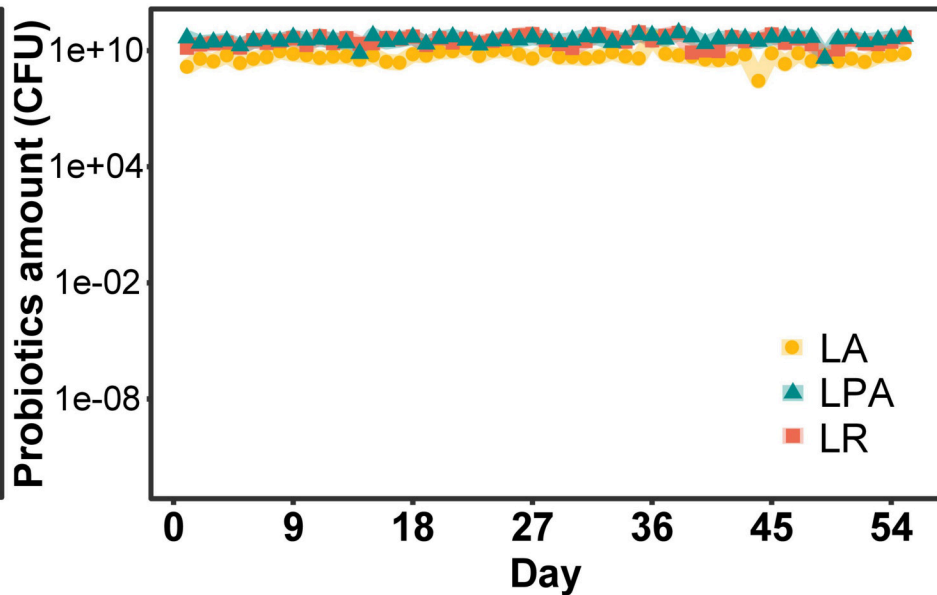**(C)**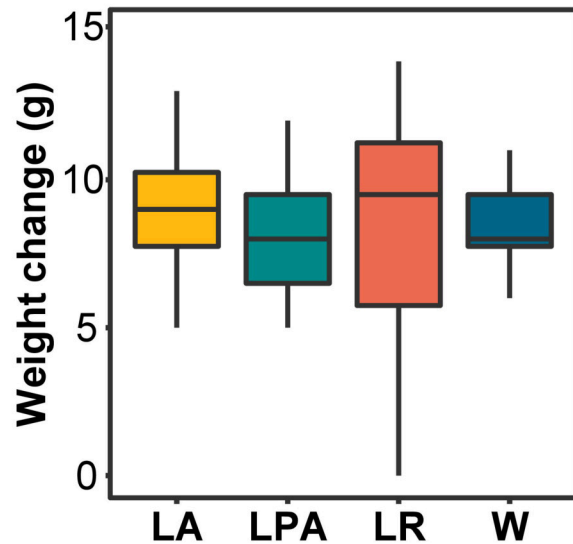

**(A)**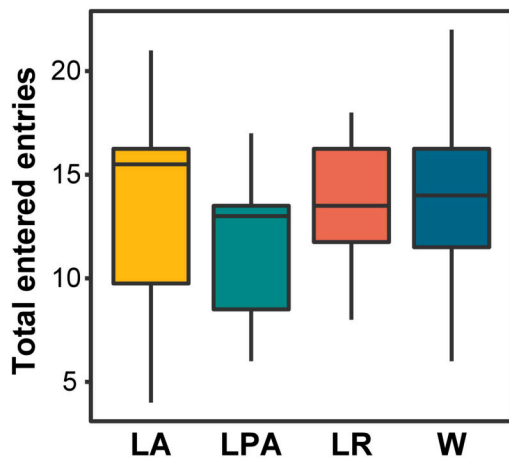**(B)**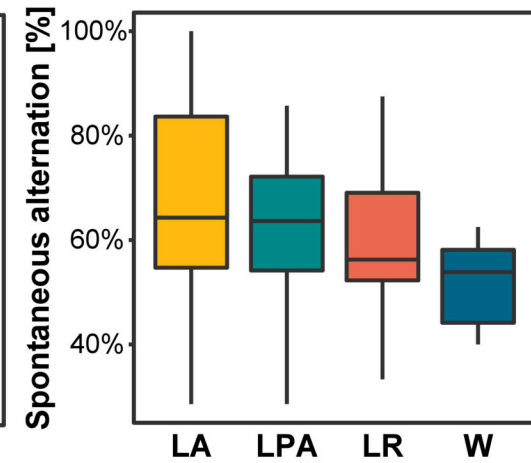**(C)**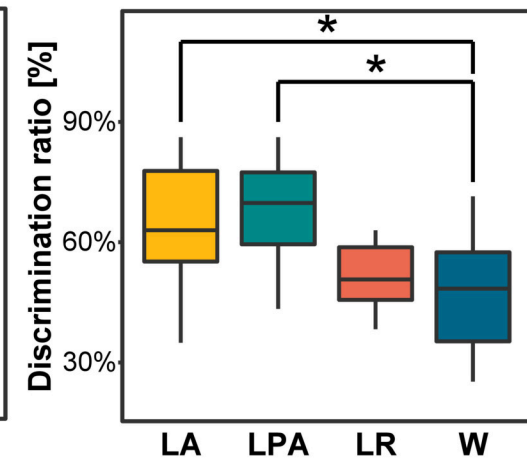**(D)**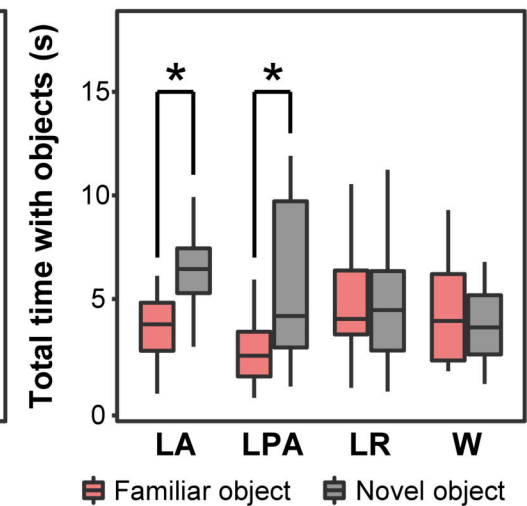**(E)**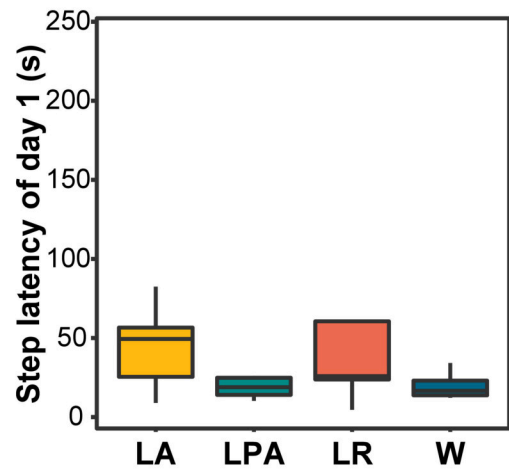**(F)**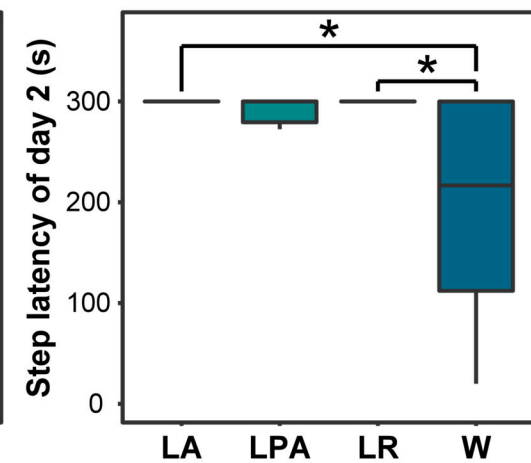**(G)**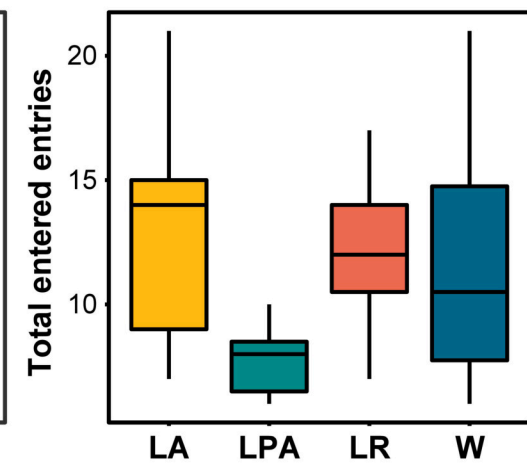**(H)**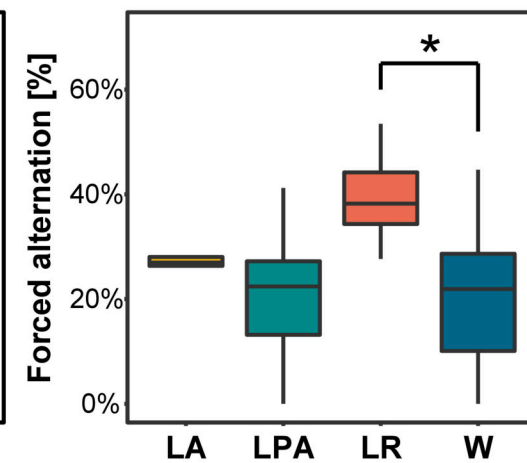

**(A)**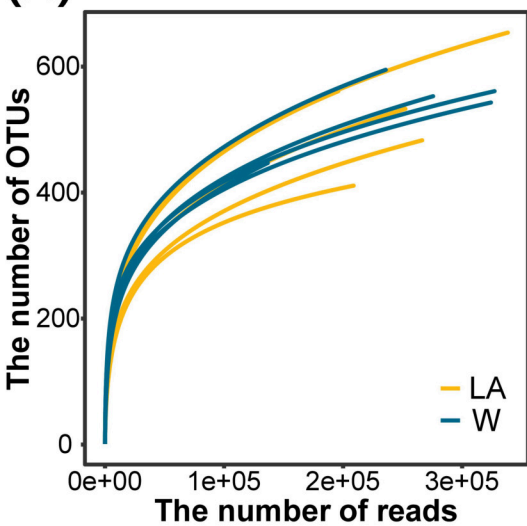**(B)**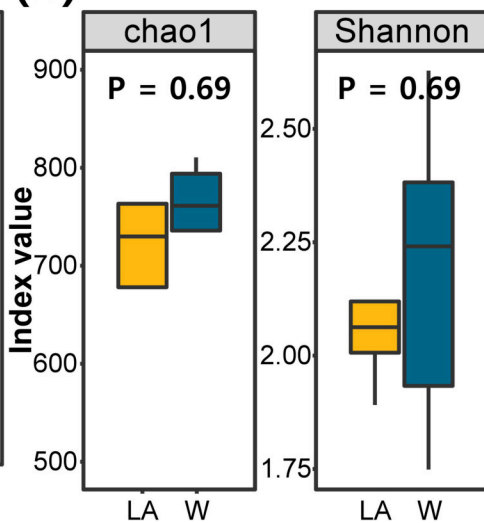**(C)**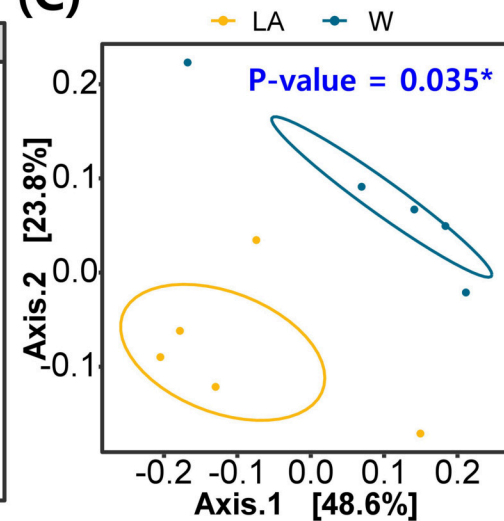**(D)**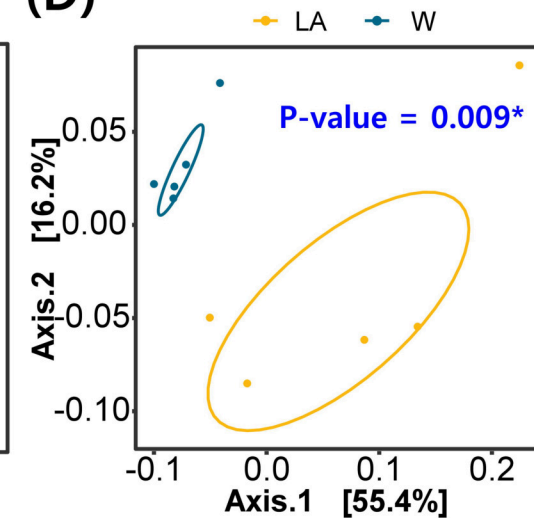**(E)**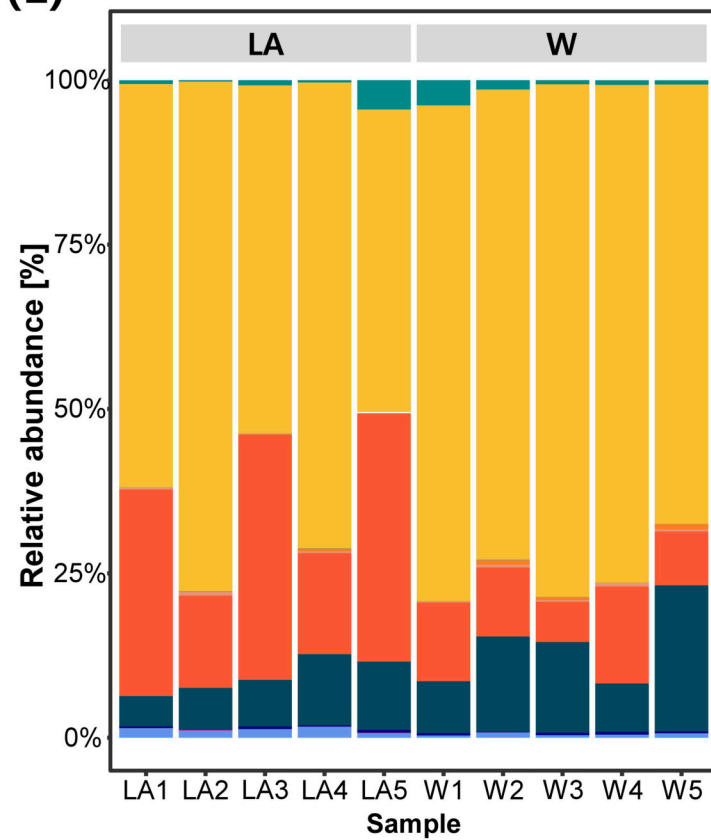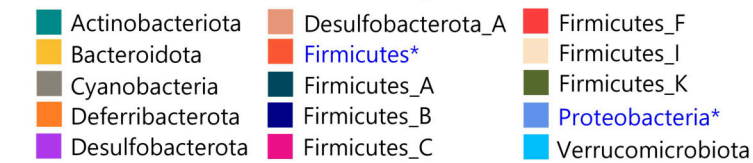**(F)**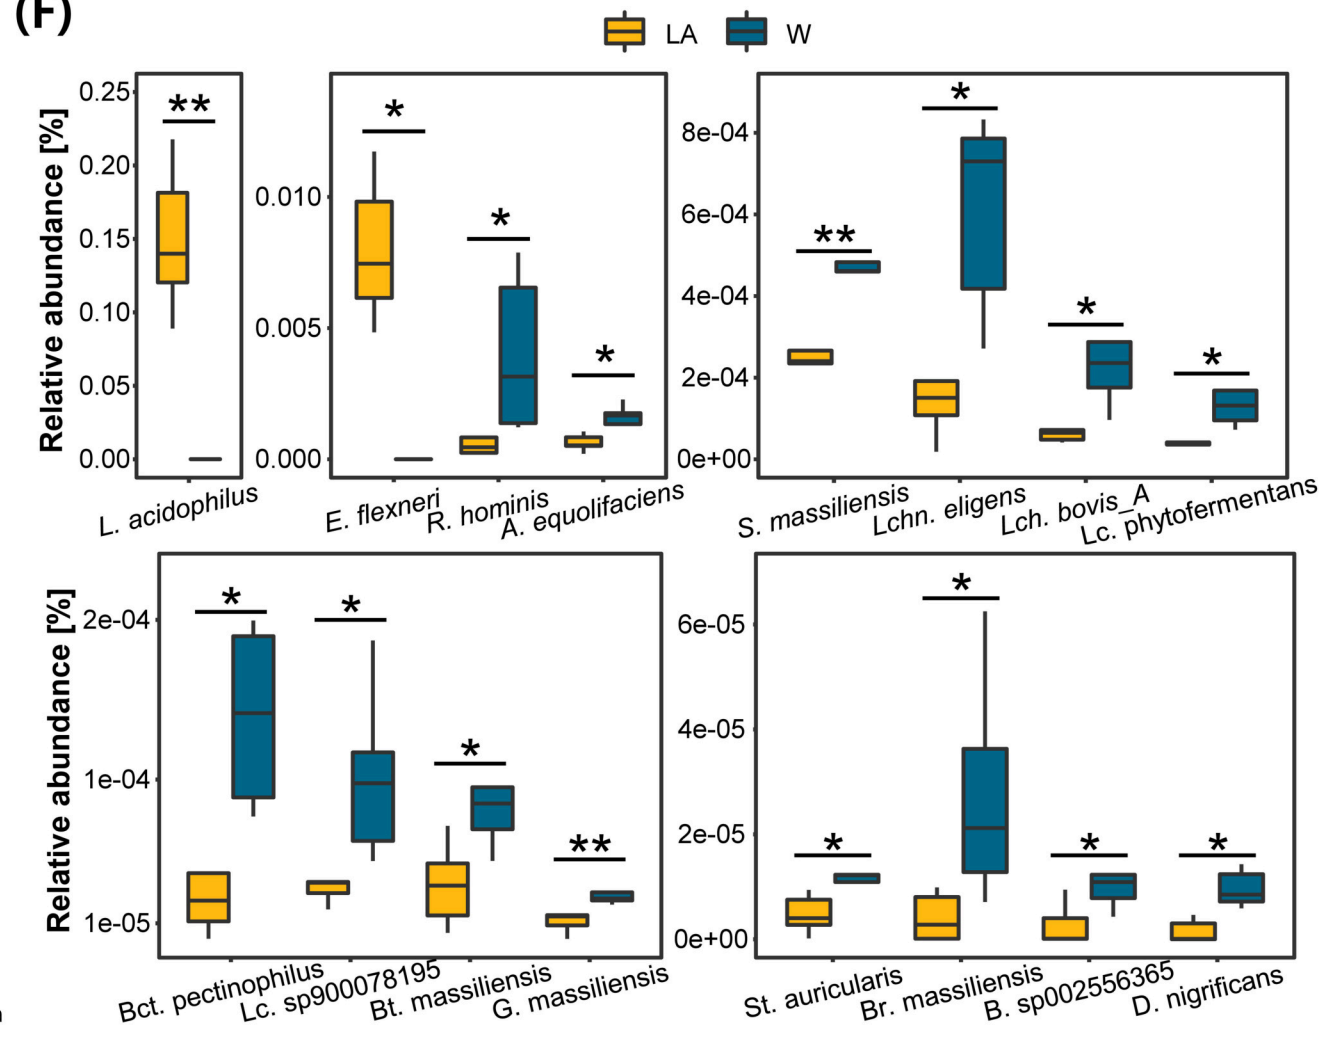

**KEGG level1** ■ Environmental Information Processing ■ Human Diseases ■ Metabolism

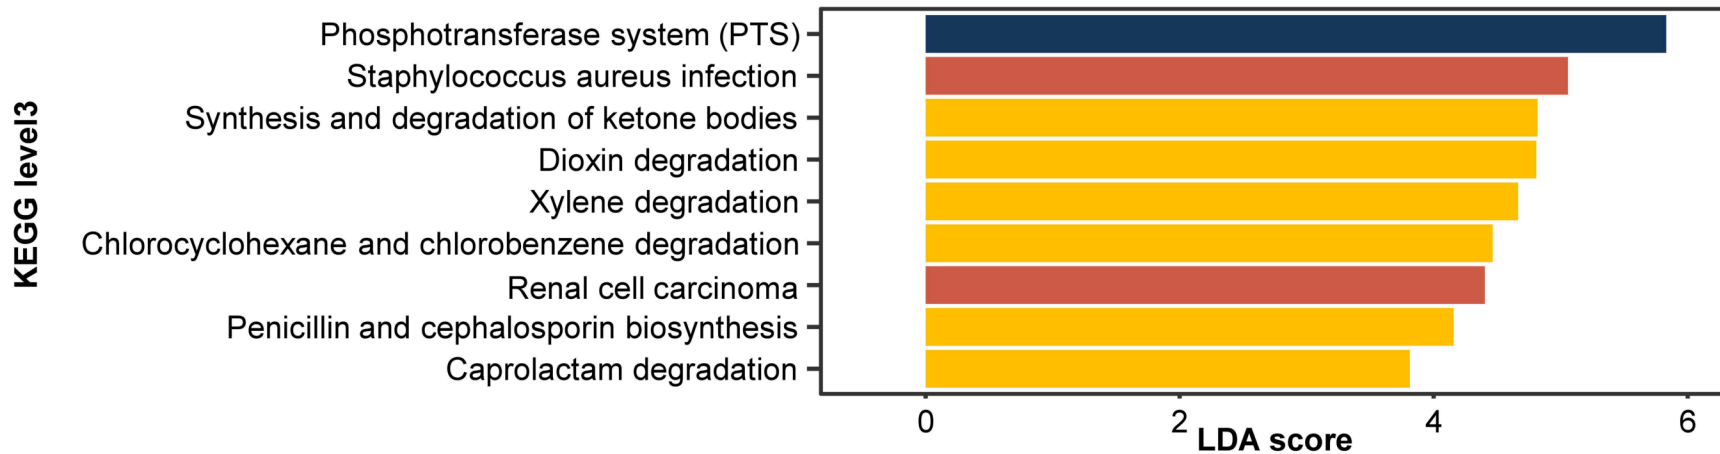

# Category

- Species observed differently
- Novel object recognition test
- Forced alternation
- Passive avoidance task
- Spontaneous alternation
- Fermentation product

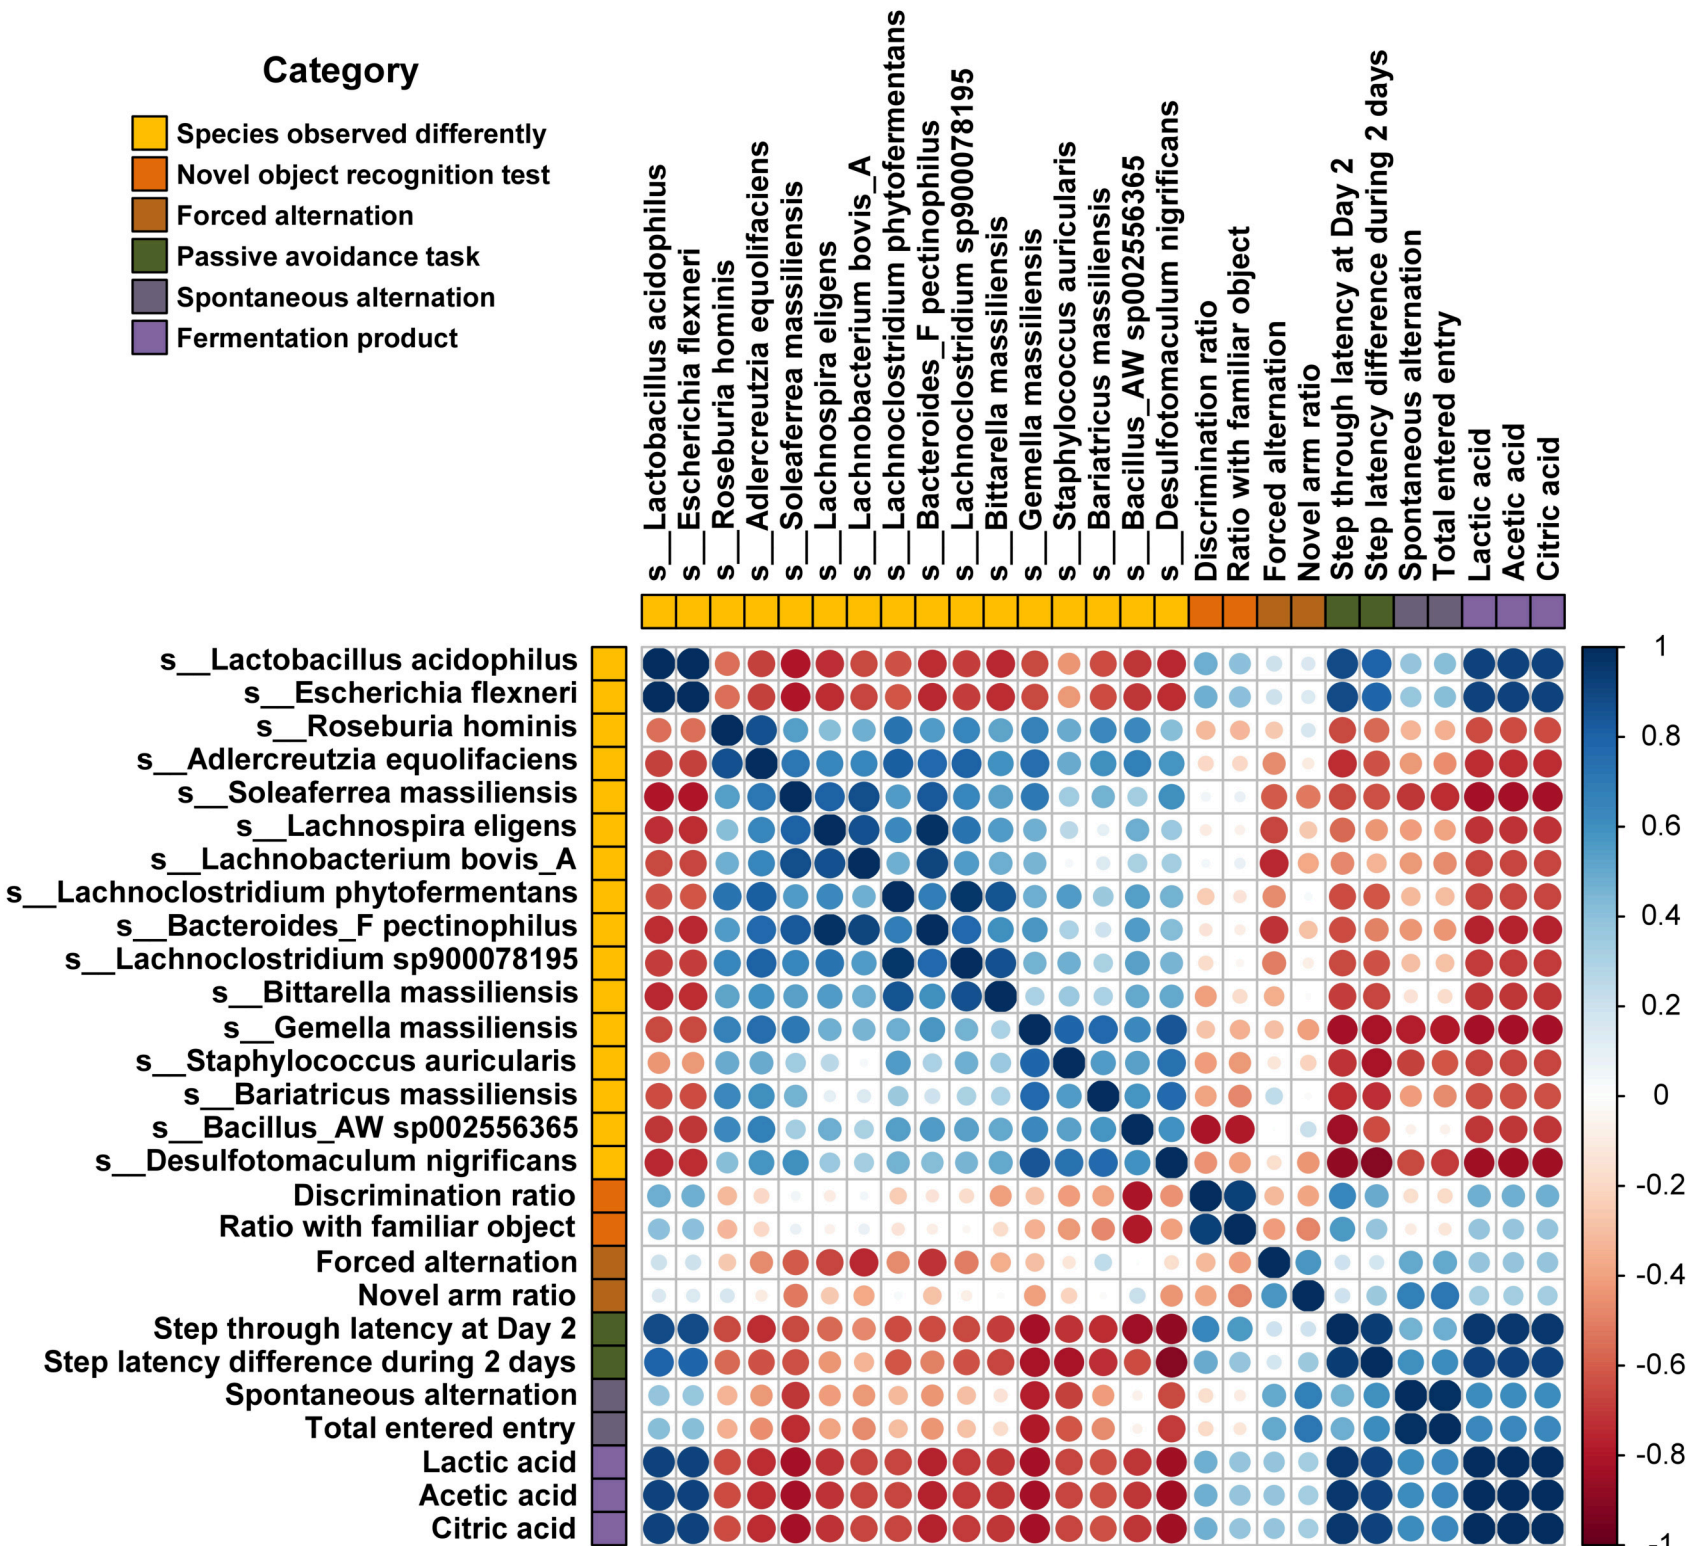

**(A)****Protein proportion [%]**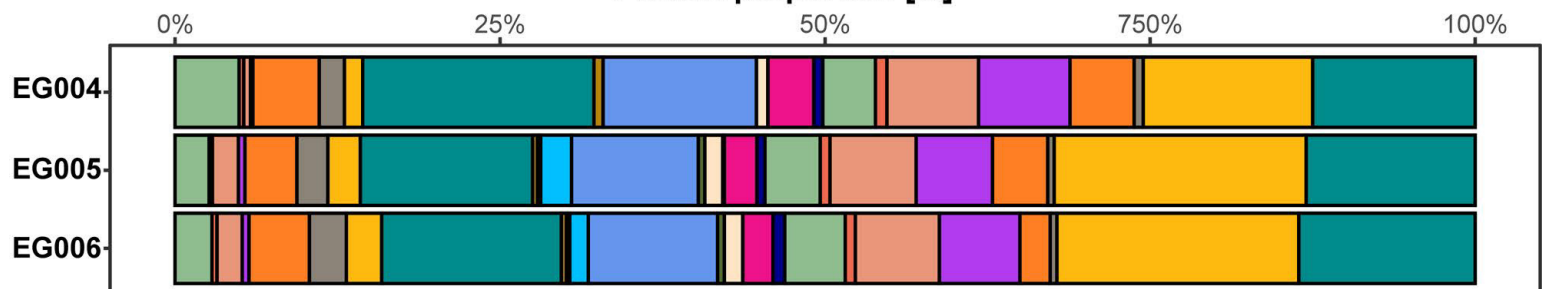**Subcategory**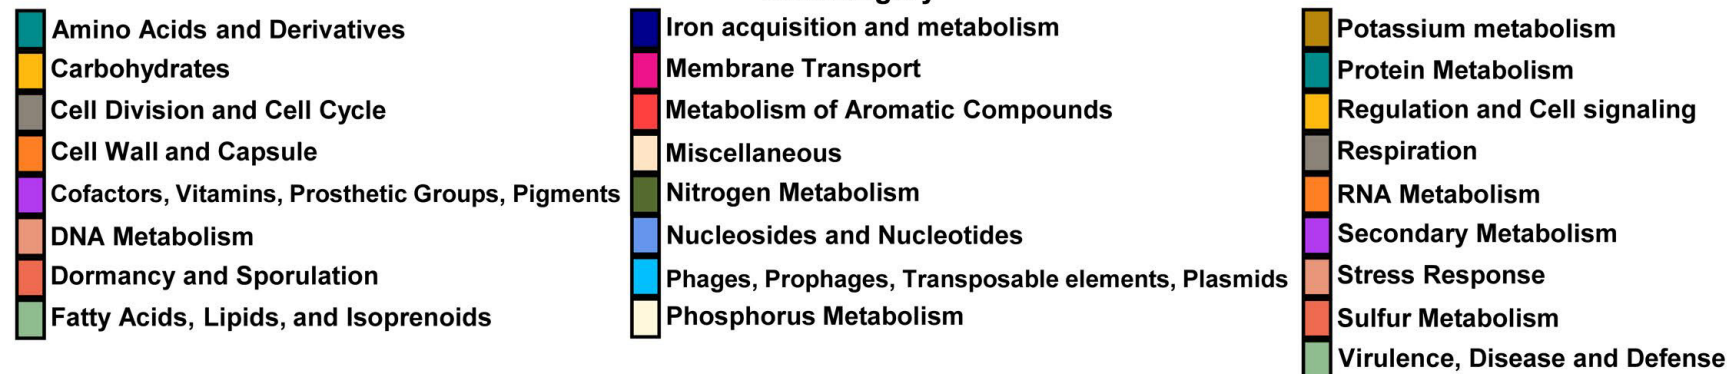**(B)**

EG004 EG005 EG006

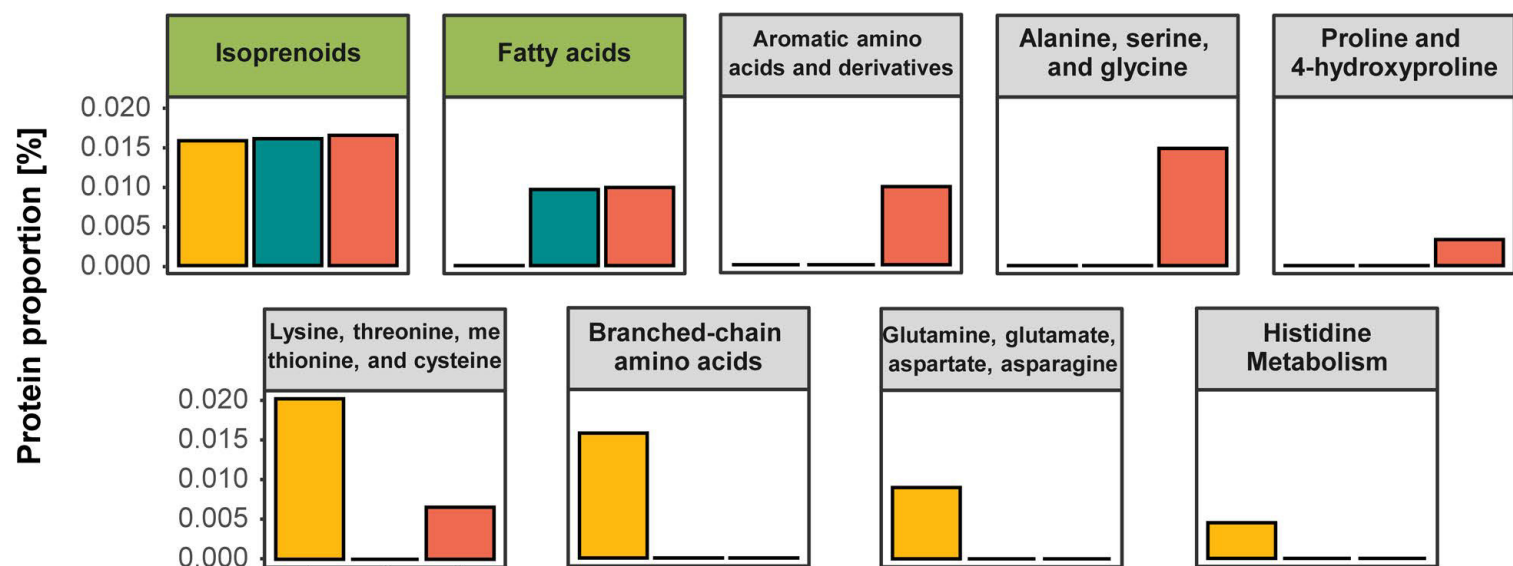



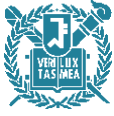

### Brief Rebuttal to the remarks of the reviewer3

**Comment #1 of the reviewer3:** The metagenome sequencing data (16S-23S rRNA) should be submitted to GenBank if it is not submitted yet.

#### Amendment for comment #1

We thank the reviewer for raising this issue. As the reviewer's comment, we have finished uploading the metagenome sequencing data and whole-genome sequence data of *Lcb. paracasei* EG005 and *Lcb. rhamnosus* EG006. For readers and other researchers' access to data, we added a 'Data availability' session with NCBI accession numbers (*Line 636-640, page 31-32*). Circularized genomes of the three probiotics were added with annotation information in the supplementary information (*Supplementary\_data, page 5-7*). We expect that this will give more credit to our research and provide a new application to other researchers.

**Comment #2 of the reviewer3:** The aim of the paper is to study effect on cognitive ability of *Lactobacillus acidophilus* EG004 in healthy mouse and fecal microbiome analysis using full-length 16S-23S rRNA metagenome sequencing.

In the manuscript, the authors studied a bacterial strain *Lactobacillus acidophilus* EG004 with a positive effect on cognitive ability using a healthy animal model. The authors experimentally verified improved cognitive ability by cognitive behavioral tests. The authors performed full 16S-23S rRNA sequencing and provided gut microbiome composition at a species level. The provided microbiome composition consisted of candidate microbial groups as a biomarker that shows positive effects on cognitive ability. Therefore, their study suggests a new perspective for probiotic strain use applicable for medicine.

The uniqueness of the text is 90% by AntyPlagiarism.net.

The manuscript is written well. English is proper, well understandable.

Reviewer has some comments:

- Line 74 - most of researches were - should be - most of the researches was.
- Line 73 - many researches - should be - many pieces of research.
- Line 82 - industrialization process - should be - industrialization processes.
- Line 105 - for the sentence - Autism, Alzheimer's disease, and Parkinson's disease (7-9) - add additional citation (Danilenko et al., 2021) and add to the References - Danilenko, V.N., Devyatkin, A.V., Marsova, M.V., Shibilova, M.U., Ilyasov, R.A., Shmyrev, V.I., 2021b. Common inflammatory mechanisms in COVID-19 and Parkinson's diseases: the role of microbiome and probiotics in their prevention. *Journal of Inflammation Research* 14, (In press). doi: 10.2147/JIR.S333887.
- Line 108 -to the sentence - the neural pathways of the brain-gut axis (10). - add additional citation (Fetissov et al., 2019). and



add to the References - Fetissov, S.O., Averina, O.V., Danilenko, V.N., 2019. Neuropeptides in the microbiota-brain axis and feeding behavior in autism spectrum disorder. *Nutrition* 61, 43-48. doi: 10.1016/j.nut.2018.10.030.

- Line 112 - Second, the second suggestion - should be - Second, the suggestion
- Line 113 - microbiome affect brain - should be - microbiome affects brain.
- Line 113 - metabolic pathway - should be - metabolic pathways.
- Line 127 - remove one dot.
- Line 153 - The averages daily - should be - The averages of daily.
- Line 168 - In the comparison of - should be - The comparison of.
- Line 194 - light room - should be - lightroom.
- Line 195 - remove italics of the word - group.
- Line 226 - comparison - should be - comparative.
- Line 236 - familiae - should be - families.
- Line 275 - whole genome - should be - whole-genome.
- Line 308 - recognition test and passive avoidance task - should be - recognition tests and passive avoidance tasks.
- Line 321 - were - should be - was.
- Line 343 - factor - should be - factors.
- Line 350 - purpose - should be - purposes.
- Line 370 - these evidences - should be - this evidence.
- Line 398 - negative effect - should be - negative effects.
- Line 408 - to provide - should be - provide.
- Line 413 - These analyses were not covered to identification of a biological factor caused - should be - These analyses were not covered in the identification of a biological factor that caused.
- Line 416 - probiotics ingestion - should be - probiotic ingestion.
- Line 444 - by - should be - at.
- Line 442 - with - should be - at.
- Line 453 - add space after dot.
- Line 457 - from probiotics intake - should be - after probiotic intake.
- Line 459 - room condition - should be - room conditions.
- Line 472 - rodent's habit - should be - rodents' habits.
- Line 478 - entered - should be - that entered.
- Line 486 - preference - should be - preferences.
- Line 516 - After 1 minute for adaptation - should be - After 1 minute of adaptation.
- Line 531 - time taken - should be - time is taken.
- Line 554 - correction - should be - corrections.
- Line 789 - statistic - should be - statistics.

Please check English by professional translator one more times.

In further authors should study details of biological factors and molecular mechanisms that caused improved cognitive ability in mice after treatment with *L. acidophilus* EG004 strain.

#### Amendment for comment #2

Thank you for reading carefully and giving us kind advice. This is the kindest comment we've ever received. Based on the reviewer's comments, we revised the manuscript. However, the paper the reviewer recommended was not found because the paper was not published yet. So, we added another paper that indicated the relationship between the gut microbiome and Parkinson's disease (Danilenko VN, Stavrovskaya AV, Voronkov DN, Gushchina AS, Marsova MV, Yamshchikova NG, Ol'shansky AS, Ivanov M, Ivanov M, Illarionov SN, Neurology E. 2020. The use of a pharmabiotic based on the *Lactobacillus fermentum* U-21 strain to modulate the neurodegenerative process in an experimental model of Parkinson disease). We expect it to help the readers understand our contents. To deliver accurately, grammatical errors have been corrected throughout the entire manuscript again. As the reviewer mentioned, we are designing a further

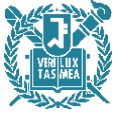

**Dept. of Agricultural Biotechnology and Research  
Institute of Agriculture and Life Sciences  
Seoul National University  
San 56-1 Daehak-dong, Gwanak-gu, Seoul 151-742  
Republic of Korea**

study including measurement of metabolite changes to understand the biological mechanism accurately. We hope to report positive results again in the near future.

---

November 29, 2021

Prof. Heebal Kim  
Seoul National University  
Seoul  
Korea (South), Republic of

Re: Spectrum01815-21R1 (Positive effect on cognitive ability of *Lactobacillus acidophilus* EG004 in healthy mouse and fecal microbiome analysis using full-length 16S-23S rRNA metagenome sequencing)

Dear Prof. Heebal Kim:

Thank you for submitting your manuscript to Microbiology Spectrum. As you will see your paper is very close to acceptance. Please modify the manuscript along the lines recommended by Reviewer 3 (see below). As these revisions are quite minor, I expect that you should be able to turn in the revised paper in less than 30 days, if not sooner. If your manuscript was reviewed, you will find the reviewers' comments below.

When submitting the revised version of your paper, please provide (1) point-by-point responses to the issues I raised in your cover letter, and (2) a PDF file that indicates the changes from the original submission (by highlighting or underlining the changes) as file type "Marked Up Manuscript - For Review Only". Please use this link to submit your revised manuscript. Detailed instructions on submitting your revised paper are below.

Link Not Available

Thank you for the privilege of reviewing your work. Below you will find instructions from the Microbiology Spectrum editorial office and comments generated during the review.

The ASM Journals program strives for constant improvement in our submission and publication process. Please tell us how we can improve your experience by taking this quick [Author Survey](#).

Sincerely,

Jan Claesen

Editor, Microbiology Spectrum

Reviewer comments:

Reviewer #3 (Comments for the Author):

Reviewer comments

Manuscript: Spectrum01815-21R1 Positive effect on cognitive ability of *Lactobacillus acidophilus* EG004 in healthy mouse and fecal microbiome analysis using full-length 16S-23S rRNA metagenome sequencing

The manuscript was improved but I have some questions:

Line 54 - Cognition is one of the functions of the brain. The authors should write in the Manuscript the idea that they study bacterial strain that has positive effects on brain function, which can be recognized through changes in cognitive processes.  
Line 68 - In the annotation, you do not say a word about strains EG005 and EG006. Why? Also, add into the discussion part more information about comparison and differences in the action of these three strains. Explain the reasons for these differences.

Line 130 - will be better if you use the word - healing effects

Line 150 - what kind of molecular method? add the explanation into the text.

Line 390 - you wrote - that the antibacterial activity of *L. acidophilus* EG004 was the potential reason for cognitive ability enhancement. - how it is possible? Why do you assume this?

Line 407 - Line 54 - Cognition is one of the functions of the brain. The authors should write in the Manuscript the idea that they study bacterial strain that has positive effects on brain function, which can be recognized through changes in cognitive processes.

Line 421 - why male?

Line 605 - Why is EG004 do not present here?

Line 623 - Add here the information from Data availability - The complete sequences of *Lcb. paracasei* EG005 and *Lcb. rhamnosus* EG006 is available in the NCBI database with accession numbers, SAMN23227569 and SAMN23227570, respectively. The metagenomic sequences are available in the NCBI database under the accession number PRJNA781018. Please answer my question and add information to the Manuscript.

I added the PDF file with highlighted comments.

No other comments.

A minor revision is required.

### **Preparing Revision Guidelines**

To submit your modified manuscript, log onto the eJP submission site at <https://spectrum.msubmit.net/cgi-bin/main.plex>. Go to Author Tasks and click the appropriate manuscript title to begin the revision process. The information that you entered when you first submitted the paper will be displayed. Please update the information as necessary. Here are a few examples of required updates that authors must address:

- point-by-point responses to the issues I raised in your cover letter
- Upload a compare copy of the manuscript (without figures) as a "Marked-Up Manuscript" file.
- Each figure must be uploaded as a separate file, and any multipanel figures must be assembled into one file.
- Manuscript: A .DOC version of the revised manuscript
- Figures: Editable, high-resolution, individual figure files are required at revision, TIFF or EPS files are preferred

For complete guidelines on revision requirements, please see the journal Submission and Review Process requirements at <https://journals.asm.org/journal/Spectrum/submission-review-process>. **Submissions of a paper that does not conform to Microbiology Spectrum guidelines will delay acceptance of your manuscript. "**

Please return the manuscript within 60 days; if you cannot complete the modification within this time period, please contact me. If you do not wish to modify the manuscript and prefer to submit it to another journal, please notify me of your decision immediately so that the manuscript may be formally withdrawn from consideration by Microbiology Spectrum.

If your manuscript is accepted for publication, you will be contacted separately about payment when the proofs are issued; please follow the instructions in that e-mail. Arrangements for payment must be made before your article is published. For a complete list of **Publication Fees**, including supplemental material costs, please visit our [website](#).

Corresponding authors may [join or renew ASM membership](#) to obtain discounts on publication fees. Need to upgrade your membership level? Please contact Customer Service at [Service@asmusa.org](mailto:Service@asmusa.org).

Thank you for submitting your paper to Microbiology Spectrum.

1 **Title**

2 Positive effect on cognitive ability of *Lactobacillus acidophilus* EG004 in healthy  
3 mouse and fecal microbiome analysis using full-length 16S-23S rRNA  
4 metagenome sequencing

5

6 **Running title**

7 Positive effect on cognitive ability of *L. acidophilus*

8 **Authors**

9 Soomin Jeon<sup>a,†</sup>, Hyaekang Kim<sup>a,†</sup>, Jina Kim<sup>a</sup>, Donghyeok Seol<sup>a,b</sup>, Jinchul Jo<sup>a</sup>,  
10 Youngseok Choi<sup>a</sup>, Seoae Cho<sup>b</sup>, Heebal Kim<sup>a,b,d,\*</sup>

11 <sup>a</sup>Department of Agricultural Biotechnology and Research Institute of Agriculture  
12 and Life Sciences, Seoul National University, Seoul, Republic of Korea

13 <sup>b</sup>eGnome, Inc, Seoul, Republic of Korea

14 <sup>d</sup>Interdisciplinary Program in Bioinformatics, Seoul National University, Seoul,  
15 Republic of Korea

16 \*Corresponding authors

17 † Soomin Jeon and Hyaekang Kim contributed equally to this work. Author order

18 was determined retroalphabetically.

19

20 Soomin Jeon

21 Email: soty23@snu.ac.kr

22 Hyaekang Kim

23 Email:hkim458@snu.ac.kr

24 Jina Kim

25 Email:jinak750@gmail.com

26 Donghyeok Seol

27 Email:sdh1621@snu.ac.kr

28 Jinchul Jo

29 Email: macjoo2000@snu.ac.kr

30 Youngseok Choi

31 Email:seok1213neo@snu.ac.kr

32 Seoae Cho

33 Email:seoae@egenome.co.kr

34 Heebal Kim

35 Email: heebal@snu.ac.kr

36

37 \*Correspondence

38 Heebal Kim, Department of Agricultural Biotechnology and Research Institute of

39 Agriculture and Life Sciences, Seoul National University, Seoul, Republic of

40 Korea

41 Email: heebal@snu.ac.kr

42 Tel.: +82-2-880-4822

43 Fax: +82-2-883-8812

44

45 **Word count**

46 Abstract; 249 words

47 Text; 4,245 words (excluding materials and methods) and 6,952 words (including

48 materials and methods)

49



## 50 **Abstract**

51 The concept of the 'Gut-brain axis' has risen. Many types of research demonstrated the effect and  
52 mechanism of the GBA. Although many studies have been reported, most of the studies are  
53 focused on neurodegenerative disease and it is still not clear what type of bacterial strains have  
54 positive effects on the brain. Therefore, we designed an experiment to discover a strain that  
55 positively affects cognitive ability using healthy mice. The experimental group consisted of a  
56 control group and three probiotic consumption groups, *Lactobacillus acidophilus*,  
57 *Lacticaseibacillus paracasei*, and *Lacticaseibacillus rhamnosus*, which are verified to have  
58 beneficial effects for host health as the gut microbiome. Cognitive ability was measured by 4  
59 cognitive-behavioral tests and the group fed on *L. acidophilus* showed the most improved  
60 cognitive ability. To provide an understanding of the altered microbial composition effect on the  
61 brain, we performed full 16S-23S rRNA sequencing using Nanopore, and OTUs were identified  
62 at a species level. In the group fed on *L. acidophilus*, the intestinal bacterial ratio of Firmicutes  
63 and Proteobacteria phyla increased and the bacterial proportions of 16 species were significantly  
64 different from those of the control group. We estimated that the positive results on the cognitive  
65 behavioral tests were due to the increased proportion of *L. acidophilus* EG004 strain in the  
66 subjects' intestines since the strain is capable of producing butyrate and therefore modulating  
67 neurotransmitters and neurotrophic factors. We expect that our new strain expands the industrial  
68 field of *L. acidophilus* and helps understand the mechanism of the brain-gut axis.

69

## 70 **Importance**

71 In recent, the concept of 'gut-brain axis' has risen that microbes in the GI tract affect brain by

72 modulating signal molecules. Although many pieces of research were reported in a short period,  
73 a signaling mechanism and effect of a specific bacterial strain are still unclear. Besides, since  
74 most of the researches was focused on neurodegenerative disease, the study with a healthy  
75 animal model is still insufficient. In this study, we provide a bacterial strain (*Lactobacillus*  
76 *acidophilus* EG004) with a positive effect on cognitive ability using a healthy animal model. We  
77 experimentally verified improved cognitive ability by cognitive behavioral tests. We performed  
78 full 16S-23S rRNA sequencing using Nanopore MinION, and provided gut microbiome  
79 composition at a species level. The provided microbiome composition consisted of candidate  
80 microbial groups as a biomarker that shows positive effects on cognitive ability. Therefore, our  
81 study suggests a new perspective for probiotic strain use applicable for various industrialization  
82 processes.

83

#### 84 **Keywords**

85 *Lactobacillus acidophilus*, gut microbiome, gut-brain axis, cognitive ability, Nanopore  
86 sequencing

87

## 88 **Introduction**

89       The human body is a complex community that habituates various bacteria. Among the  
90 bacterial communities in the human body, the gastrointestinal tract is the best bacterial  
91 community that has the most abundant and various bacteria (1). In 2006, having been released  
92 research that obesity is associated with bacterial composition in the gut, a study for gut  
93 microbiome began in earnest (2). The gut microbiome is defined as the collective genomes of  
94 microorganisms that live in the gastrointestinal tract. Functions of the gut microbiome have been  
95 reported such as nutrient metabolism and regulation of the immune system for the host (3).  
96 Microbial composition in the gut is altered by environmental factors like age, diet, stress, and  
97 lifestyle, and the change in microbial composition can induce physical changes in the host (4). In  
98 recent, the gut microbiome's effects on the brain have been proved and the concept of the brain-  
99 gut axis has risen to the surface (5). The brain-gut axis is a complex system involving the enteric  
100 nervous system and central nervous system including the brain and spinal cord, and it works with  
101 bidirectional communication between the central and the enteric nervous system (6). Although  
102 the brain is located apart from the gut, the gut microbiome can affect the brain by stimulating the  
103 enteric nervous system and vagus nerve. Thus, dysbiosis of the gut microbiome often causes  
104 brain diseases. The recent experimental results described that gut microbiome dysbiosis was  
105 observed in patients with Autism, Alzheimer's disease, and Parkinson's disease (7-10). At the  
106 same time, studies on the mechanisms to understand the brain-gut axis have been conducted.  
107 First, it was suggested that the microbial-derived metabolites are the main components acting on  
108 the neural pathways of the brain-gut axis (11, 12). The most well-studied substances are short-  
109 chain fatty acids (SCFA) such as acetate, propionate, and butyrate, which are produced in the  
110 process of decomposing non-digestible fibers and carbohydrates (13). It promotes indirect

111 signaling to the brain by modulation and induction of neurotransmitter and neurotrophic factors  
112 like  $\gamma$ -aminobutyric acid (GABA) and Brain-derived neurotrophic factor (BDNF). Second, the  
113 suggestion was that the gut microbiome affects brain function by regulating metabolic pathways  
114 (14). Previous research reported that the level of tryptophan metabolites including serotonin and  
115 indolepyruvate was altered by the gut microbiome. These metabolites have roles in the  
116 functioning of the gut-brain axis such as signaling and anti-oxidant. Third, the gut microbiome  
117 may affect the brain by immune pathway (15). Interferon (IFN), Tumor necrosis factor (TNF),  
118 and Interleukin are well-known immune factors. According to recent studies, the amount of the  
119 immune factors is regulated by the intestinal microflora. These immune factors affect brain  
120 function by stimulating and activating the hypothalamic-pituitary-adrenal axis. Finally, it was  
121 suggested that gut microbes directly influence the brain by altering the fatty acid composition of  
122 the brain (16). Several studies have been reported on the correlation between intestinal  
123 microbes and the brain, but the specific mechanism of the brain-gut axis is still not clear.

124 Probiotics are defined as bacteria that have positive effects on the host body (17). Probiotics  
125 have been widely used as a health supplement since it has various beneficial functions to host's  
126 health with high adhesion property to the intestine and low side effect. Most probiotics include  
127 bacteria genera that are gram-positive, facultative anaerobic and rod-shaped. *Lacticaseibacillus*  
128 *rhamnosus* (*Lcb. rhamnosus*) is one of the longest-studied probiotic species, and many strains  
129 such as LGG and GR-1 belonging to this genus are commercially available. It is well known that  
130 *Lcb. rhamnosus* has positive effects on diarrhea, acute gastroenteritis, and atopic dermatitis (18-  
131 20). Recently, its neurobehavioral effects such as anxiety and depression relief have been  
132 reported (21). *Lacticaseibacillus paracasei* (*Lcb. paracasei*) is one of the representative probiotic  
133 species, and it has been studied to be effective in treating ulcerative colitis and allergic rhinitis

134 (22, 23). In a recent study, an effect on age-related cognitive decline and a stress relief effect was  
135 reported with several strains of this species (24). *Lactobacillus acidophilus* (*L. acidophilus*) is  
136 another representative probiotic strain. This strain lowers cholesterol levels and has beneficial  
137 health effects such as antibacterial effects against harmful bacteria like *Streptococcus mutans* and  
138 *Salmonella typhimurium* (25, 26).

139 In this study, we aimed to present a new strain that has an enhancing effect on cognitive  
140 ability through the brain-gut axis and provide an additional understanding of the brain-gut axis.  
141 Three probiotic strains, *L. acidophilus*, *Lcb. paracasei*, and *Lcb. rhamnosus*, which have  
142 previously demonstrated beneficial effects to the host as one of the gut-microbiome strains, were  
143 used to confirm their positive effects on cognitive ability. Full 16S and 23S rRNA sequencing  
144 was performed to annotate the gut microbiome at a species level for downstream analysis. We  
145 expect our results to provide an understanding of the role of the gut microbiome.

146

## 147 **Results**

### 148 **Bacterial and animal treatments**

149 Three probiotic strains, *L. acidophilus* EG004, *Lcb. paracasei* EG005, and *Lcb. rhamnosus*  
150 EG006, have been identified by the molecular method. These strains were clustered with  
151 available *L. acidophilus*, *Lcb. paracasei*, and *Lcb. rhamnosus* strains, respectively, in a  
152 phylogenetic tree of 16S rRNA gene (Figure S1). Probiotic strains were consumed by mice for 8  
153 weeks with assessments of cognitive ability (Figure 1). The averages of daily water intake per  
154 subject were similar between groups (Figure 2A). Daily probiotic intakes were maintained  
155 constantly and the average amount of *L. acidophilus* group, *Lcb. paracasei* group, and *Lcb.*  
156 *rhamnosus* group were calculated as  $(7.82E09 \pm 1.95E09)$ ,  $(4.37E10 \pm 5.17E09)$ , and  
157  $(3.74E10 \pm 3.98E09)$  CFUs (Figure 2B). To identify the additional effect of probiotics, the body  
158 weights of mice were measured every week (Figure 2C and S2). Patterns of weight gain in the 4  
159 groups were similar for 8 weeks. The mean body weight gains of the control group showed the  
160 highest value, which was 9.08 g. *Lcb. paracasei* group showed a significant difference from the  
161 control group with P-value under 0.05 in the second measurement, but the difference was  
162 immediately recovered. Similar to weekly weight change, statistical significance was not found  
163 in accumulated weight between experimental groups for 8 weeks.

164

### 165 **Cognitive behavioral tests**

166 Spontaneous alternation test was conducted to assess spatial learning and short-term  
167 memory. Although the average number of the total entries to each arm in *Lcb. paracasei* group

168 was slightly low, the difference between groups was not found (Figure 3A). The comparison of  
169 the mouse ratio showed spontaneous alternation for the first 3 entries, *L. acidophilus* group  
170 showed the highest value as 75.0%. (Table S1). In spontaneous alternation, the average values of  
171 probiotics-fed groups were higher than the value of the vehicle-fed group (Figure 3B). Among  
172 the 4 experimental groups, *L. acidophilus* group showed the highest alternation ratio. Wilcoxon  
173 rank-sum test was performed to identify statistical significance, but there was no statistical  
174 difference between the experimental groups and control group.

175 Novel object recognition (NOR) test was performed to evaluate long-term and explicit  
176 memory using 4 different features (Figure 3C, 3D, and Table S1). *L. acidophilus* group exhibited  
177 the highest average ratio of mouse that touched the novel object before the familiar object,  
178 whereas *Lcb. rhamnosus* group showed the lowest value under the control group. At  
179 discrimination ratio comparison, the three probiotics-fed groups showed higher average values  
180 than the control, and *L. acidophilus* group showed the highest values. To identify if there is a  
181 significant difference, Wilcoxon rank-sum test was performed. When compared to the vehicle-  
182 fed group, *L. acidophilus* and *Lcb. paracasei* groups displayed statistically significant differences  
183 with the adjusted P-value of 0.037. To identify animal behavior detail, the number of objects  
184 touch and the total time of object observation in each group were compared. In a comparison of  
185 object touch, statistical differences were significant in *L. acidophilus* and *Lcb. paracasei* groups  
186 with P-values of 0.031 and 0.042, respectively. Also, *L. acidophilus* group had a significant  
187 difference between the time taken to observe the familiar object and the novel object.

188 Passive avoidance task was conducted to measure long-term and implicit memory. Step-  
189 through latency was used to compare the mean difference between the experimental groups.

190 Most of the subjects were transferred into a darkroom for a minute on day 1 (Figure 3E). Only 3  
191 animals took over 100 seconds to get into the darkroom. The difference between the  
192 experimental group and the control was not found on day 1. When compared to the latency time  
193 on day 1, the average latency time increased on day 2, and unexpectedly, 26 animals stayed in  
194 the lightroom for over 300 seconds (Figure 3F). *Lcb. rhamnosus* group presented the highest  
195 average latency time, followed by *L. acidophilus* group while the control group showed the  
196 lowest average (Table S1). The Mann-Whitney U test was conducted to check the mean  
197 difference, the P-values of *L. acidophilus* and *Lcb. rhamnosus* groups were less than 0.05  
198 compared to the control group. The adjusted P values of both groups were 0.040.

199 To assess spatial learning and long-term memory, forced alternation was conducted.  
200 Memory was evaluated by forced alternation (%), the number of arms that the mouse entered,  
201 and the percentage of mice in a group that entered the novel arm as their first entry. While the  
202 total number of the entries into each arm was diverse, there was no significant difference  
203 between the experimental groups and control (Figure 3G). *L. acidophilus* group scored the  
204 highest ratio of mice entered the novel arm as their first entry (Table S1). Forced alternation  
205 values of *L. acidophilus* and *Lcb. rhamnosus* groups were higher than the value of the control  
206 group (Figure 3H). Forced alternation of *Lcb. rhamnosus* group and the control group had a  
207 significant difference with the adjusted P-value of 0.038.

208

### 209 **Full 16S-23S rRNA sequencing and biological diversity**

210 Metagenome sequencing was performed with *L. acidophilus* and control groups, which  
211 showed the most improvement in cognitive ability. We compared the microbial composition of



212 both groups. Gut microbial component information annotated at a species level was completely  
213 constructed by sequencing the entire 16S-23S rRNA of the mouse stool (Table 1). Averagely,  
214 323870.0±84085.5 reads were generated from 10 stool samples. The total number of identified  
215 OTU was 252401.6±56284.7 in *L. acidophilus* group and 259945.6±78526.0 in the control group.  
216 The produced OTUs were annotated as a total of 528.4±90.4 species in *L. acidophilus* group and  
217 539.8±55.4 species in the control group. To check the sufficiency of the sequencing depth for the  
218 analysis, a rarefaction curve was created (Figure 4A).

219 Alpha diversity was calculated to compare species richness within a group (Figure 4B). In  
220 the comparison of the two groups, no significant difference was found in Chao1 Shannon indexes.  
221 Beta diversity was measured to compare the diversity of the microbial community between the  
222 two groups (Figure 4C and D). It was confirmed that both beta diversity evaluations (Bray-Curtis  
223 and Unifrac distance) had significant differences.

224

## 225 **Microbial composition**

226 In the comparative analysis of microbial compositions, taxonomies with significantly  
227 different ratios were found between *L. acidophilus* group and the control group. At the phylum  
228 level, Bacteroidota accounted for the highest proportion in both groups, followed by Firmicutes  
229 (Figure 4E). Significant differences between the two groups were found in 2 of the 12 phyla  
230 (Firmicutes, Proteobacteria), all of which were high in *L. acidophilus* group. At the class level,  
231 Bacteroidia showed the highest proportion in both groups. Also, the proportion of Bacilli and  
232 Gammaproteobacteria classes were increased in *L. acidophilus* group when compared to the  
233 control group (Figure S3). At the order level, Bacteroidales showed the highest percentage in

234 both groups, and Lactobacillales and Enterobacterales orders were found to exhibit higher  
235 proportions in *L. acidophilus* group. At the family level, *Muribaculaceae* showed the highest  
236 proportion in both groups. It was found that 2 families (*Lactobacillaceae* and *Enterobacteriaceae*)  
237 showed increased proportions in *L. acidophilus* group, while a decreased percentage was  
238 observed in one family (*Ruminococcaceae*). In the Genus comparison, *Muribaculum* genus  
239 showed the highest ratio in the two groups, and 12 genera showed differences between groups.  
240 Three genera showed an increased proportion in the experimental group, whereas 9 genera  
241 showed higher mean values in the control group. The genus increased in *L. acidophilus* group  
242 were *Lactobacillus*, *Staphylococcus\_A*, and *Escherichia*, whereas the genera decreased in *L.*  
243 *acidophilus* group were *Bacteroides\_F*, *Desulfotomaculum*, *Lachnobacterium*, *Bittarella*,  
244 *Agathobacter*, *Roseburia*, *Bariatricus*, and *Lachnospirarea*. At the Species level, *Muribaculum*  
245 *intestinale* was found to account for the largest proportion, with over 50% in both groups.  
246 Following *M. intestinale*, the species *Lactobacillus acidophilus*, *Lactobacillus johnsonii*,  
247 *Lactobacillus\_B murinus*, and *Lactobacillus\_H reuteri* were found with a high proportion in *L.*  
248 *acidophilus* group, while *Lactobacillus\_B murinus*, *Bacteroides\_B vulgatus*, *Faecalibaculum*  
249 *rodentium*, and *Kineothrix alysoides* species showed a high proportion in the control group. No  
250 unique bacterial species were found in either of the two groups. Seventeen species showed  
251 differences between groups, and it was confirmed that the proportions of *L. acidophilus* and *E.*  
252 *flexneri* were increased in *L. acidophilus* group (Figure 4F).

253

## 254 **Functional profiling and correlation analysis**

255 Functional profiling was performed at the KEGG level 3 to estimate the effect of the

256 differential composition of intestinal microbes on the mice (Figure 5). By calculating the LDA  
257 score, it was confirmed that the two groups showed significantly different patterns in 9 categories.  
258 All nine categories were predicted to be more activated in *L. acidophilus* group. The  
259 Phosphotransferase system (PTS) scored the highest, followed by *Staphylococcus aureus*  
260 infection, Synthesis and degradation of ketone bodies.

261 To further estimate the influence of the altered gut microbiota, Spearman's correlation  
262 analysis of cognitive-behavioral abilities and bacterial OTUs, and fermentation products were  
263 performed (Figure 6). *L. acidophilus* and *E. flexneri* showed a positive correlation with all  
264 assessments of cognitive abilities, while the other 14 OTUs presented a negative correlation. In  
265 particular, step-through latency at Day 2 and Step latency difference for 2 days of the PAT results  
266 showed a significant negative correlation with the *Gemella massiliensis* ( $r = -0.8379$ ,  $p =$   
267  $0.03248$  and  $r = -0.8182$ ,  $p = 0.0376$ ) and *Desulfotomaculum nigrificans* ( $r = -0.8781$ ,  $p =$   
268  $0.01914$  and  $r = -0.8450$ ,  $p = 0.03225$ ).

269 To provide evidence to indirectly infer the mechanism of action of the gut microbiome, the  
270 concentration of SCFA in the microbial culture was measured (Table S2). Lactic acid and acetic  
271 acid were found in three microbial cultures. Lactic acid was identified in the highest  
272 concentration in *Lcb. paracasei* EG005, and acetic acid was included in the highest concentration  
273 in *L. acidophilus* EG004 culture. Propionate and butyrate were not within detectable ranges.

274

### 275 **Comparative analysis of genetic contents in bacterial whole-genome sequences**

276 To identify its safety and functionality, several genetic factors were detected. Fourteen  
277 genomic islands, two prophage regions, one CRISPR region, and three bacteriocins were found

278 in the genome of *L. acidophilus* EG004. In *Lcb. paracasei* EG005, 29 genomic islands, 7  
279 prophage regions, 3 CRISPR regions, and 2 bacteriocins were detected (Figure S4-S6). In the  
280 case of *Lcb. rhamnosus* EG006, 23 genomic islands, 8 prophage regions, 3 CRISPR regions, and  
281 1 bacteriocin were found in the genome. To estimate a genetic factor related to cognitive ability,  
282 protein annotation was conducted (Figure 7A). Protein metabolism, Carbohydrates, Amino acids  
283 and derivatives showed high proportions, but there was a difference in order by bacterial strains.  
284 Protein metabolism had the highest proportion in *L. acidophilus* EG004 and carbohydrates  
285 presented the highest proportion in *Lcb. paracasei* EG005 and *Lcb. rhamnosus* EG006. In a  
286 subcategory comparison of predicted functional sequences, a difference of genetic contents was  
287 found (Figure 7B). CDSs related to Fatty acids were found in the genomes of *Lcb. paracasei*  
288 EG005 and *Lcb. rhamnosus* EG006. Genes of 3 subcategories (Aromatic amino acids and  
289 derivatives, Alanine, serine, and glycine, and Proline and 4-hydroxyproline) were detected in *Lcb.*  
290 *rhamnosus* EG006, while genes of 3 other categories in Amino Acids in Derivatives were  
291 contained in only *L. acidophilus* EG004.

292

## 293 **Discussion**

294 As interest in Gut-Brain Axis has increased, many types of research in this criterion have  
295 been published. However, it is still unclear about the integral mechanism and which strain has a  
296 positive or negative effect. Therefore, we aimed to develop a new strain that has a positive effect  
297 on the host's cognition, and we found 3 strains that caused positive effects in 4 different  
298 cognitive tests (Figure 3). *Lcb. paracasei* group showed improved cognitive ability in the novel  
299 object recognition test. A previous study indicated that this bacterium prevents age-related  
300 cognitive decline and improves cognitive ability (24). Other strain, *Lcb. rhamnosus*, displayed  
301 improved cognitive ability in passive avoidance task and forced alternation test. Several studies  
302 demonstrated that *Lcb. rhamnosus* consumption could increase cognitive ability (27, 28). Similar  
303 to previous studies, we experimentally confirmed that *Lcb. paracasei* and *Lcb. rhamnosus* could  
304 enhance cognitive function. On the other hand, although it is indicated that *L. acidophilus* strain  
305 has a neuroprotective effect against traumatic brain injury, there was no experimental research  
306 related to its cognitive ability (29, 30). In our study, we identified that *L. acidophilus* group  
307 presented the highest classical measured values as well as incidental measured values in novel  
308 object recognition tests and passive avoidance tasks. This indicates that *L. acidophilus* is capable  
309 of improving cognitive ability comparable to that of previously reported strains. Our results will  
310 help further broaden the industrial field of *L. acidophilus*. In addition, although probiotic  
311 consumptions were carried out as the same method, three experimental groups showed improved  
312 cognitive ability in different tests. It implies that different probiotic strains affect cognitive ability  
313 by different mechanisms.

314 To understand the effect of the gut microbiome on the brain as our secondary goal, we  
315 performed gut microbiome analysis of *L. acidophilus* group, which showed the best cognitive  
316 improvement, along with the control group, The difference of species richness was not found in  
317 the comparison of alpha diversity, whereas the difference was found in the comparison of beta  
318 diversity (Figure 4B, 4C, and 4D). It represents that the number of OTUs constituting the two gut  
319 microbial communities is similar, but the composition of the OTUs is different. In the  
320 comparison of the two communities, significant differences were observed at all taxonomic  
321 levels except for the bacteria kingdom, which was mostly *L. acidophilus*. Naturally, *L.*  
322 *acidophilus* group was confirmed to show a significant increase in *L. acidophilus* abundance and  
323 ultimately show a high ratio of *L. acidophilus*. This indicates that a large amount of *L.*  
324 *acidophilus* is capable of safely reaching the intestines without being affected by digestive juices  
325 such as gastric acid and pancreatic enzymes.

326 We estimated that the positive effect on cognitive ability due to the increased proportion of  
327 *L. acidophilus* in the intestines was based on two rationales: modulation of neurotransmitters and  
328 neurotrophic factors and production of SCFAs. First, *L. acidophilus* modulates several types of  
329 neurotransmitters in the intestine. Microbial-derived intermediates, which affect the brain  
330 through gut epithelial and blood-brain barriers, are such as GABA ( $\gamma$ -aminobutyric acid),  
331 glutamate, dopamine, noradrenaline, serotonin (5-Hydroxytryptamine; 5-HT), and Brain-derived  
332 neurotrophic factor (BDNF). These neurotransmitters are synthesized from various amino acids.  
333 GABA and glutamate are produced from the gut microbiome such as *Bifidobacterium* and  
334 *Lactobacillus* (31). Glutamate has a role as a neurotransmitter by itself, and it is used at GABA  
335 synthesis (32). Dopamine and Noradrenaline are synthesized from specific amino acids such as  
336 tyrosine and phenylalanine (33). L-Tryptophan is a well-known precursor of serotonin (34).

337 Therefore, altered amino acid composition by the gut microbiome seems to affect the host's  
338 neurotransmitter synthesis. In the comparison of the functional protein genes, *L. acidophilus*  
339 EG004 showed a higher composition of the gene related to amino acid metabolism, than *Lcb.*  
340 *paracasei* EG005 and *Lcb. rhamnosus* EG006 showed (Figure 7A). Changes in intestinal amino  
341 acid composition caused by ingested *L. acidophilus* may have led to differences in cognitive  
342 ability. It has been proven that *L. acidophilus* consumption produces and up-regulates  
343 neurotransmitter and neurotrophic factors including GABA and serotonin (35-38). Thus, it is  
344 estimated that increased *L. acidophilus* EG004 in the gut modulates neurotransmitters and affects  
345 the animal's nerve system. Second, SCFAs, fermentation products of *L. acidophilus*, positively  
346 apply to brain function. For example, acetate, one of the short-chain fatty acids (SCFAs),  
347 promotes the activation of the parasympathetic nervous system (39). Also, it is indicated that  
348 acetate improved cognitive ability and neurogenesis in the hippocampus with increasing BDNF  
349 and IGF-1 levels as a glatiramer acetate form (40). Likewise, butyrate, a famous HDAC inhibitor,  
350 has been used for pharmacological purposes since lower global histone acetylation is a common  
351 phenomenon observed in many neurodegenerative diseases (41). Its therapeutic effect on  
352 neurodegenerative diseases including Parkinson's disease was verified, showing enhancement of  
353 neurotrophic factors and improvement in learning and memorizing (42). However, SCFAs are  
354 not produced until non-digestible carbohydrates reach the small intestine to be broken down by  
355 microbial metabolism, so it is not fully produced by the human digestive enzymes without  
356 specific microbes. *L. acidophilus* is a representative species that produces SCFAs through non-  
357 digestive carbohydrates, and it can be assumed that the intake of *L. acidophilus* EG004 caused  
358 the increase in SCFAs of the experimental mice's gut. The result of SCFA measurement in  
359 bacterial culture raises the possibility of this assumption (Table S2). Although it is different from

360 the metabolism in the gut since the SCFAs were measured in the medium to which glucose is the  
361 main energy source, it indirectly estimates its SCFA-producing ability. The result of functional  
362 profiling in our study also upholds this (Figure 5B). In the analysis of functional profiling,  
363 activation of genes of synthesis and degradation of ketone bodies was predicted by comparing it  
364 with control. The ketone body is one of the main fuels of the brain like lactate and butyrate,  
365 which is the main product of *L. acidophilus*, and is also capable of replacing glucose as an  
366 alternative fuel. Similar to butyrate mentioned earlier, ketone bodies modulate the brain with  
367 anti-oxidant reaction, energy supply, regulation of deacetylation activity, and regulation of the  
368 immune system. In recent studies, it is indicated that the increase of ketone body's concentration  
369 induces an alleviation effect on brain diseases such as epilepsy, Alzheimer's disease, and  
370 Parkinson's disease as well as memory improvement (43-45). Based on this evidence, ingested *L.*  
371 *acidophilus* EG004 in our experimental group seems to have produced SCFAs and modulated  
372 neurotransmitters, and *L. acidophilus*-derived metabolite would have raised cognitive ability.  
373 Although we did not measure microbial-derived metabolites, previous researches demonstrated  
374 that probiotic consumption leads to an increase of microbial-derived metabolites in the intestines.

375 Among detected species with the ratio difference, several species were indicated as  
376 important factors in the research of brain disease. *Adlercreutzia equolifaciens* is equol  
377 (phytoestrogen) producing bacteria, which obstructs microglial function. In previous studies, a  
378 higher ratio of *A. equolifaciens* was found in the gut of patients with Alzheimer's disease and  
379 Autism spectrum disorder (46, 47). In other studies, *Roseburia hominis* and *Bacteroides\_F*  
380 *pectinophilus* were detected with a higher ratio in the patients with Alzheimer's disease than the  
381 normal persons (48, 49). When comparing gut microbiome between the Parkinson's disease  
382 group and normal group, *Soleaferrea massiliensis* was more frequently discovered in the patient



383 group (50). Interestingly, those strains that showed a high ratio from the previous studies of brain  
384 disease patients were found to show a lower ratio in *L. acidophilus* group when compared to the  
385 control group (Figure 4F). Decreased bacterial ratio related to brain diseases seems to positively  
386 affect cognitive ability and we believe that it is due to *L. acidophilus* consumption. As  
387 antibacterial activity is the essential property of probiotics, such activity of *L. acidophilus* against  
388 harmful and pathogenic bacteria has been reported. In our previous study, we proved that *L.*  
389 *acidophilus* EG004 is capable of demonstrating the antimicrobial activity (51). Therefore, we  
390 suggest that the antibacterial activity of *L. acidophilus* EG004 was the potential reason for  
391 cognitive ability enhancement.

392 In functional profiling analysis, we offered explainable factors for the microbial effect on  
393 the brain. Three KEGG categories were related to toxic chemical degradation: Dioxin  
394 degradation, Xylene degradation, and Caprolactam degradation (Figure 5B). Dioxin, a  
395 neurotoxin, can raise autism and neurodegenerative disease (52, 53). Xylene inhibits normal  
396 protein synthesis of neuronal function and induces instability in the neuronal membrane. When it  
397 is inhaled, psychological deficits can be caused (54, 55). These chemicals are noxious to the  
398 brain, so activation of these chemical degradations would have diminished negative effects in *L.*  
399 *acidophilus* group. Besides, two KEGG categories related to the immune system were found.  
400 One of them is *Staphylococcus aureus* infection, which is known to cause brain abscess. Since  
401 there have been many studies demonstrating that *L. acidophilus* has antimicrobial activity against  
402 *S. aureus*, activation of this category is thought to be due to an increase in the amount of *L.*  
403 *acidophilus*. The function of renal cell carcinoma was predicted in the experimental group. As it  
404 involves not only tumor suppressor genes such as VHL, GH, and BHD, but also oncogenes such

405 as MET and PRCC-TFE3, it seems to be necessary to confirm the exact mechanism and side  
406 effects.

407 The purpose of this study was to develop a new strain that can improve cognitive ability and  
408 provide an underlying biological mechanism affecting the brain by the gut microbiome. It is  
409 necessary to measure metabolite changes in order to provide an understanding of the mechanism  
410 of altered cognitive ability. However, altered metabolite from animal body was not fully  
411 identified. To overcome this limitation, we conducted the metagenome analysis, correlation  
412 analysis between cognitive ability and gut microbiome, measurement of SCFA producing ability,  
413 and whole-genome comparison analysis. These analyses were not covered in the identification of  
414 a biological factor that caused improved cognitive ability, but presented a group of genes and  
415 mechanisms that can infer the process. Although we did not provide direct evidence of phenotype  
416 changes caused by probiotic ingestion, we hope that our findings will help infer the process of  
417 the brain-gut axis.

418

## 419 **Materials and Methods**

### 420 **Animals**

421 4-week-old male C57BL/6 mice (n = 48, average weight 26g) were gained from YoungBio  
422 (Seongnam, Korea). All mice were housed in a group of four per cage under standard controlled  
423 laboratory conditions (temperature of 20±5°C, humidity of 55~60%) on a 12-h light/dark cycle  
424 (light on at 7:00 a.m.). Each group was constituted of 12 mice, and it was nurtured by  
425 distributing 4 mice to 3 cages. Twelve cages were located at random. All animals received *ad*  
426 *libitum* access to food. All animal experiments were performed following protocols approved by  
427 the Institutional Animal Care and Use Committee (IACUC) of Seoul National University, and the  
428 permission number is SNU-190607-4-3.

429

### 430 **Bacterial treatment**

431 The bacterial strains were isolated from fermented dairy foods. When identifying the brain-  
432 gut axis effect, the important factors to be considered were viability and adherence capacity.  
433 Therefore, we selected the species that are known to have adherence capacity in the GI tract, as  
434 well as the potential for gut-brain axis effect. To identify species of each strain, 16S rRNA genes  
435 were sequenced by Macrogen Inc. (Seoul, Korea) with 27F and 1492R primers. Obtained  
436 sequences were compared with sequences in the NCBI database using BLAST. The experiment  
437 was constituted with 4 groups; 3 experimental groups were fed on autoclaved tap water mixed  
438 with *L. acidophilus* EG004, *Lcb. paracasei* EG005, and *Lcb. rhamnosus* EG006, and a control  
439 group was fed on sterilized tap water. Each group consisted of 12 mice. Bacteria to delivery were

440 freshly cultivated every day. Probiotic colonies were sub-cultured into 5ml MRS broth for 8  
441 hours. After the sub-culture, 3 probiotic strains were inoculated in 500 ml MRS broth for 16  
442 hours. Cultivated cells were spun down by centrifugation at 4,000 rpm for 10 min. The  
443 supernatant was removed, and the pellet was suspended by 0.85 % NaCl solution. Re-suspended  
444 cells were centrifuged at 4,000 rpm for 10 min to remove medium ingredients. The washing  
445 process was conducted twice. Washed cells were dissolved into autoclaved tap water. The final  
446 cell concentration of vehicles was about  $1.0 \times 10^9$  CFU/ml. To estimate the probiotics amount per  
447 day per subject, daily water intake and probiotic concentration in vehicles were recorded. Cell  
448 viability of probiotics was measured by serial dilution and spreading in MRS agar plate. The  
449 probiotics amount per day per subject was calculated as an average of daily water intake per  
450 subject, by multiplying the average of daily probiotic concentration.

451

## 452 **Animal treatment**

453 The animal experiment was designed to minimize animal stress. All animal treatment was  
454 described in [Figure 1](#) by timeline. Four weeks old mice were allowed to habituate freely for  
455 acclimatization for 1 week. After a week, tap water and water mixed with probiotics were  
456 delivered every day. Water intake was monitored every day and body weight was measured every  
457 week. Evaluations of cognitive ability were conducted after 4 weeks after probiotic intake.  
458 Behavioral tests were conducted at least 2 days after the weight-measurement day to minimize  
459 the stress effect. Animals were carried to a behavioral test room to assimilate room conditions  
460 and were allowed to relax for 6 hours before any behavioral test. In order to reduce the variance  
461 of feeding time, the experimental order of the mice was distributed evenly. All apparatus and

462 objects for the behavioral tests were cleaned with 70 % ethanol and dried after every trial to  
463 remove odors and any clues. The mice were sacrificed at the end of 13 weeks after the  
464 evaluations of the cognitive behavior. Preliminary experiments were conducted to obtain  
465 appropriate experimental values under our experimental environmental conditions. The three to  
466 five experimental conditions referring to published results were tested in our laboratory, and the  
467 experimental conditions showing a value similar to the average value of the previous studies  
468 were determined.

469

#### 470 **Y maze (Spontaneous alternation; SA)**

471 Short-term spatial memory was assessed with a Y maze apparatus. SA was used to measure  
472 rodents' habit to explore a new environment. The Y maze consisted of 3 identical arms that cross  
473 each other with 120° (JEUNGDO Bio & Plant Co., Ltd., Korea). Mice are laid in the middle of  
474 the Y maze facing a corner, not an arm. Each animal was allowed to freely navigate all three  
475 arms for 5 minutes and the animal's entries to any arm were recorded. An arm entry was  
476 determined as any instance when the whole body of the mouse entered the arm and navigated at  
477 least 70% of the space. The spatial memory was evaluated by spontaneous alternation, the  
478 number of arm entries, and the ratio of mice per group that entered spontaneous alternation  
479 during the first three entries. Spontaneous alternation was calculated as shown below.

$$480 \quad \text{Spontaneous alternation [\%]} = \frac{\text{Number of spontaneous alternation}}{\text{Total number of arm entries} - 2} \times 100$$

481

#### 482 **Novel object recognition test (NOR)**

483 Based on the concept that mice tend to prefer a new object over a familiar one, a novel  
484 object recognition test (NOR test) was performed in an open field (40×40×40 cm (W×D×H),  
485 JEUNGDO Bio & Plant Co., Ltd., Korea). Two objects for this test were selected showing  
486 similar preferences through the preference test. The test consisted of Sample trial (T1; 10 min),  
487 Interval time (IT; 60 min), and Novel object trial (T2; 5 min). In T1, 2 identical objects were  
488 located at 1/3 and 2/3 diagonal of the open field, respectively. The animal was laid facing the  
489 wall with the same distance to two objects, and was allowed to explore objects for 10 min. After  
490 exploration, the mouse came back to the cage and had a rest. In T2, objects were positioned at  
491 the same position as T1, but one of the objects was changed to a novel object. To measure the  
492 time taken to interact with objects, all experiment processes were recorded, and the exploration  
493 time was measured by Movavi software with 3 decimal places. It was recognized as significant  
494 only when the mouse approached facing the objects within 2.5 cm. Cases that the mouse climbed  
495 objects and individuals with exploration time less than 2 seconds were excluded. The results  
496 were presented as a discrimination ratio, the number of object touches, and the ratio of mouse  
497 that touched the novel object first before it touched the familiar object. The discrimination ratio  
498 was defined as the below equation.

499 
$$\text{Discrimination ratio [\%]} = \frac{\text{Novel object interaction time}}{\text{Novel object interaction time} + \text{Familiar object interaction time}} \times 100$$

500

### 501 **Passive avoidance task (PAT)**

502 The passive avoidance task is designed to evaluate inhibitory avoidance memory according  
503 to rodent habit that a mouse prefers dark environment naturally. Shuttle box (41×21×30 cm  
504 (W×D×H), JEUNGDO Bio & Plant Co., Ltd., Korea) is an apparatus made for the passive

505 avoidance task and consists of a bright chamber and a dark chamber which are separated by a  
506 sliding door. The floor of the chambers is made of stainless-steel grids to flow current. The test  
507 was conducted for 2 days; Acquisition (Day 1) and Test (Day 2). On day 1, a subject was put in  
508 the bright chamber facing the wall across the closed sliding door. After the mouse explored the  
509 bright chamber for 1 minute, and the moment the mouse was away from the door for over 100  
510 mm, facing the wall not the door, the door was opened so that the mouse could freely enter and  
511 move around the dark chamber. Latency time was measured until the mouse entered the dark  
512 chamber completely. The door was closed when the animal entered the dark compartment wholly  
513 including its tail, and 0.25 mA electric shock was provided to the paws by steel grid for 3  
514 seconds. To memorize the situation, the mouse was kept in the dark chamber for 30 seconds after  
515 the shock and returned to the home cage for 24 hours. On day 2, the mouse was laid again into  
516 the bright chamber. After 1 minute of adaptation, the sliding door was opened when the mouse  
517 faced the wall like day 1. Latency time was measured again until the mouse entered the dark  
518 chamber. If the animal rather stayed in the bright chamber for more than 300 seconds (which was  
519 the cut-off time), the experiment was completed. All experimental processes were recorded and  
520 the time was measured by the Movavi program with 3 decimal places.

521

## 522 **Y maze (Forced alternation; FA)**

523 Forced alternation was assessed with the same Y maze as described above. This test  
524 consisted of 3 phases; Training trial (T1; 5 min), Interval time (IT; 60 min), and Test trial (T2; 5  
525 min). A mouse was placed at a starting arm of Y maze facing the wall. The subject freely  
526 explored the maze during T1, while an entry was blocked with white expanded polystyrene. After

527 the learning trial, the mouse was returned to the home cage and rested for 1 hour. In T2, the  
528 mouse was again placed into the starting arm without the plate blocking the novel entry, and  
529 explored all three arms. All movements of mice were recorded through video. Forced alternation  
530 was evaluated by the ratio of time spent in the novel arm compared to the whole experimental  
531 time, time is taken to first enter the novel arm, and the percentage of mice per group that entered  
532 the novel arm as their first entry. The case that the mouse passed at 2/3 of the arms was admitted  
533 as a valid entrance. An individual that showed no navigation of the maze or that had entered the  
534 arms less than 5 times was excluded.

535

#### 536 **Feces collection and cognitive ability evolution**

537 After all cognitive assessments had been completed, 2-3 stool samples were taken from  
538 each experimental subject. Sterilized stainless-steel tweezers were used for fecal picking,  
539 tweezers were washed with 70% alcohol and dried sufficiently before collecting new samples.  
540 The fresh samples were immediately enclosed into a 1.5ml Eppendorf tube and were put on ice.  
541 Then, it was stored at -80 degrees Celsius until used for 16S rRNA sequencing.

542 In order to determine the group that showed the best increase in cognitive ability, a score  
543 was assigned to the cognitive ability evaluation item. The items used for evaluation are  
544 spontaneous alternation, group ratio of SA, discrimination ratio, group ratio of NOR, step latency  
545 at day 2, forced alternation, and group ratio of FA (Table S2). Scores were given in ascending  
546 order of ranking (1-4 points), and the group with the highest total was selected as the group with  
547 the highest cognitive ability increase.

548



## 549 **Statistics**

550 Data were analyzed by R studio. Ineligible data were cut based on the requirements  
551 mentioned above. Data normality was assessed using the Shapiro-Wilks test and homogeneity of  
552 variance was assessed using Levene's test. Wilcoxon rank-sum test and independence t-test was  
553 used to evaluate statistical significance between experimental groups. P-values were adjusted by  
554 the FDR method for multiple testing corrections. Statistical significance was set as P-value under  
555 0.05. All data are expressed as mean  $\pm$  SEM.

556

## 557 **Full 16S-23S rRNA sequencing**

558 To characterize the microbial community associated with measured cognitive assessment,  
559 metagenome sequencing of the 16S-23S rRNA gene was carried out by Oxford Nanopore  
560 MinION. Metagenome sequencing was performed for the control group and *L. acidophilus* group,  
561 which showed a significant difference from the control in the cognitive ability evaluation.  
562 Among the 12 stored stool samples of each group, 5 samples with sufficient amount for  
563 sequencing were selected. For library construction, gDNA was extracted from fecal samples  
564 using AccuPrep® Stool DNA extraction Kit (Bioneer, Daejeon, South Korea). To identify the  
565 quality of extracted gDNA, A260/A280 and A260/A230 absorbance were used with 0.7 %  
566 agarose gel electrophoresis. After performing quality control, selected samples were used for the  
567 library construction. Stool samples were lysed and bacterial cells were disrupted by  
568 Zirconia/Silica Beads and proteinase K. The sequencing library was prepared by 16S-26S rRNA  
569 PCR amplification with Nanopore Ligation Kit (SQK-LSK109, Nanopore, Oxford, UK)  
570 following the manufacturer's instructions. Purification and quality checks were conducted using

571 agencourt AMPure XP cleanup (Beckman Coulter, CA, USA), Quant-iT™ PicoGreen™ dsDNA  
572 Assay Kit (Invitrogen, Ireland), and 0.7% agarose gel. The PCR products were diluted and end-  
573 repaired using NEBNext FFPE Repair Mix (New England BioLabs, Ipswich, USA). The  
574 amplicon was Nick-repaired using NEBNext End repair/dA-tailing Module (New England  
575 BioLabs), prior to adapter ligation by NEBNext Quick Ligation Module (New England BioLabs).  
576 The sequencing library was loaded on primed Flongle flow cell according to Nanopore protocol.  
577 Sequencing was performed by MinION MK1b. Sequencing data was acquired by MinKNOW  
578 software (19.12.5) without live base-calling.

579

## 580 **Metagenome analysis**

581 Raw data were obtained as fast5 files. Base-calling was carried out by Guppy 4.0.11 with  
582 2,000 chunk size and 4 base callers (56). Porechop version 3 was executed for trimming adapter  
583 sequences (<https://github.com/rrwick/Porechop>). To annotate bacterial taxonomy, trimmed  
584 sequences were aligned with MIRROR (<http://mirror.egnome.co.kr/>) using Minimap2 (57). In  
585 Operational Taxonomic Unit (OTU) identification, only results with more than 2,500 matching  
586 bases and more than 3,500 bases including gaps in mapping were used. To normalize abundance  
587 data, the TMM (The trimmed mean of M-values) method was used by the edgeR package of R  
588 software (58). To characterize each group, biological diversity was calculated through the physeq  
589 package of R software (59). A rarefaction curve was constructed to check the saturation of  
590 genome sequencing. To compare species richness, alpha diversity was calculated as chao1 and  
591 Shannon indexes. To compare between groups, beta diversity was calculated using Bray-Curtis  
592 dissimilarity and Unifrac distance. P-value was calculated by the Adonis test. For detection of

593 unequal features, Wilcoxon rank-sum test was performed in each taxonomic level with 0.95  
594 confidence level. To compare functional profile, PICRUSt2 was performed (60). Correlation  
595 between cognitive ability and bacterial OTUs was inferred by Spearman's rank correlation  
596 analysis. P values were adjusted by FDR method.

597

### 598 **SCFA identification in bacterial culture**

599 To identify the amount of short-chain fatty acids (SCFAs), high-performance liquid  
600 chromatography (HPLC) was performed using Ultimate3000 (Thermo Dionex, USA) and  
601 Aminex 87H column (300x10mm, Bio-Rad, USA). Bacterial cultures of EG004, EG005, and  
602 EG006 were inoculated for 24 hours. After cultivation, the samples were filtered with 0.45 µm of  
603 a membrane filter. The filtered sample of 10µL was injected into the HPLC.

604

### 605 **Whole-genome sequencing and assembly of EG005 and EG006**

606 To identify probiotic safety and potential secondary metabolite producing ability, whole-  
607 genome sequencing of *Lcb. paracasei* EG005 and *Lcb. rhamnosus* EG006 was performed. For  
608 library construction, DNA was extracted from cultured bacterial cells. After performing quality  
609 control, gDNA was used for the library construction. Bacterial cells were lysed by lysozyme for  
610 gram-positive bacteria, and removed RNA and protein to isolate DNA. Quality control for gDNA  
611 was conducted by 260/280, 260/230 absorbance with 0.8% agarose gel. Genomic DNA was  
612 fragmented to a target length of 20Kb using g-Tube (Covaris, MA, USA) and Short DNA  
613 fragments <5 kb are depleted by SRE (Circulomics, MD, USA). The fragments were End-  
614 prepared, Nick-Repaired, and then ligated with Nanopore adapter. After every enzyme reaction,

615 the DNA samples were purified using AMPure XP beads (Beckman Coulter, CA, USA) and QC  
616 with Quant-iT™ PicoGreen™ dsDNA Assay Kit. The sequencing library was loaded on primed  
617 Flongle flow cell according to Nanopore protocol. Sequencing was performed on a MinION by  
618 MinKNOW software.

619 Base-calling from raw data was conducted by Guppy Basecaller v4.0.15 with filtering with  
620 an average basecall Phred quality score. Adapter sequences were trimmed by PoreChop v0.2.4.  
621 Genome assembly was conducted by Canu. Assembled contigs were polished by Nanopolish and  
622 racon, and pilon. Circlator circularized each contig and detect replication origin. Assembled  
623 contig was assessed by BUSCO 3.0.2. The complete sequence of *L. acidophilus* EG004 that is  
624 deposited in the NCBI database with accession number PRJNA657145 was used.

625

## 626 **Comparative analysis of bacterial genome sequences**

627 Genetic map was generated by CGView server (61). To check safety and functionality as  
628 probiotics, genetic factors were identified by whole-genome sequences. Virulence factor and  
629 prophage gene were detected by VirulenceFinder 2.0 and PHASTER, respectively.  
630 IslandViewer4 identified genomic island and crisprfinder searched CRISPR region. Bacteriocin  
631 detection was conducted by BAGLE4. To compare functional gene contents, protein prediction  
632 was performed by the RAST server. Predicted protein sequences were classified by the SEED  
633 system. Categorized protein sequences showed as the proportion in the total predicted sequences.

634

## 635 **Data availability**

636 The complete sequences of *Lcb. paracasei* EG005 and *Lcb. rhamnosus* EG006 are available

637 in the NCBI database with accession numbers, SAMN23227569 and SAMN23227570,  
638 respectively. The metagenomic sequences are available in the NCBI database under the accession  
639 number PRJNA781018.

640

641

642 **References**

- 643 1. Sender R, Fuchs S, Milo RJPb. 2016. Revised estimates for the number of human and bacteria  
644 cells in the body. 14:e1002533.
- 645 2. Turnbaugh PJ, Ley RE, Mahowald MA, Magrini V, Mardis ER, Gordon JIJn. 2006. An obesity-  
646 associated gut microbiome with increased capacity for energy harvest. 444:1027-1031.
- 647 3. Zhang Z, Tang H, Chen P, Xie H, Tao YJSt, therapy t. 2019. Demystifying the manipulation of  
648 host immunity, metabolism, and extraintestinal tumors by the gut microbiome. 4:1-34.
- 649 4. Ghaisas S, Maher J, Kanthasamy AJP, therapeutics. 2016. Gut microbiome in health and disease:  
650 Linking the microbiome–gut–brain axis and environmental factors in the pathogenesis of  
651 systemic and neurodegenerative diseases. 158:52-62.
- 652 5. Mayer EA, Savidge T, Shulman RJJG. 2014. Brain–gut microbiome interactions and functional  
653 bowel disorders. 146:1500-1512.
- 654 6. Martin CR, Osadchiy V, Kalani A, Mayer EAJC, gastroenterology m, hepatology. 2018. The  
655 brain-gut-microbiome axis. 6:133-148.
- 656 7. Pulikkan J, Maji A, Dhakan DB, Saxena R, Mohan B, Anto MM, Agarwal N, Grace T, Sharma  
657 VKJMe. 2018. Gut microbial dysbiosis in Indian children with autism spectrum disorders.  
658 76:1102-1114.
- 659 8. Hill-Burns EM, Debelius JW, Morton JT, Wissemann WT, Lewis MR, Wallen ZD, Peddada SD,  
660 Factor SA, Molho E, Zabetian CPJMD. 2017. Parkinson's disease and Parkinson's disease  
661 medications have distinct signatures of the gut microbiome. 32:739-749.
- 662 9. Singhrao SK, Harding AJEroa-it. 2020. Is Alzheimer's disease a polymicrobial host microbiome  
663 dysbiosis? 18:275-277.
- 664 10. Danilenko VN, Stavrovskaya AV, Voronkov DN, Gushchina AS, Marsova MV, Yamshchikova NG,  
665 Ol'shansky AS, Ivanov M, Ivanov M, Illarioshkin SNJAoC, Neurology E. 2020. The use of a  
666 pharmabiotic based on the Lactobacillus fermentum U-21 strain to modulate the  
667 neurodegenerative process in an experimental model of Parkinson disease. 14.
- 668 11. Martin-Gallausiaux C, Marinelli L, Blottière HM, Larraufie P, Lapaque NJPotNS. 2021. SCFA:  
669 mechanisms and functional importance in the gut. 80:37-49.
- 670 12. Fetissov SO, Averina OV, Danilenko VNJN. 2019. Neuropeptides in the microbiota-brain axis  
671 and feeding behavior in autism spectrum disorder. 61:43-48.
- 672 13. Schwartz A, Taras D, Schäfer K, Beijer S, Bos NA, Donus C, Hardt PDJO. 2010. Microbiota and  
673 SCFA in lean and overweight healthy subjects. 18:190-195.
- 674 14. Kaur H, Bose C, Mande SSJFin. 2019. Tryptophan metabolism by gut microbiome and gut-  
675 brain-axis: an in silico analysis. 13:1365.
- 676 15. Miettinen M, Vuopio-Varkila J, Varkila KJI, immunity. 1996. Production of human tumor

677 necrosis factor alpha, interleukin-6, and interleukin-10 is induced by lactic acid bacteria.  
678 64:5403-5405.

679 16. Wall R, Marques TM, O'Sullivan O, Ross RP, Shanahan F, Quigley EM, Dinan TG, Kiely B,  
680 Fitzgerald GF, Cotter PDJTAjocn. 2012. Contrasting effects of *Bifidobacterium breve* NCIMB  
681 702258 and *Bifidobacterium breve* DPC 6330 on the composition of murine brain fatty acids  
682 and gut microbiota. 95:1278-1287.

683 17. Sanders MEJCID. 2008. Probiotics: definition, sources, selection, and uses. 46:S58-S61.

684 18. Österlund P, Ruotsalainen T, Korpela R, Saxelin M, Ollus A, Valta P, Kouri M, Elomaa I, Joensuu  
685 HJBjoc. 2007. *Lactobacillus* supplementation for diarrhoea related to chemotherapy of  
686 colorectal cancer: a randomised study. 97:1028-1034.

687 19. Szajewska H, Guarino A, Hojsak I, Indrio F, Kolacek S, Shamir R, Vandenas Y, Weizman  
688 ZJJopg, nutrition. 2014. Use of probiotics for management of acute gastroenteritis: a position  
689 paper by the ESPGHAN Working Group for Probiotics and Prebiotics. 58:531-539.

690 20. Hoang BX, Shaw G, Pham P, Levine SAJI, Targets A-D. 2010. *Lactobacillus rhamnosus* cell lysate  
691 in the management of resistant childhood atopic eczema. 9:192-196.

692 21. McVey Neufeld K-A, O'Mahony SM, Hoban AE, Waworuntu RV, Berg BM, Dinan TG, Cryan  
693 JFJNn. 2019. Neurobehavioural effects of *Lactobacillus rhamnosus* GG alone and in  
694 combination with prebiotics polydextrose and galactooligosaccharide in male rats exposed to  
695 early-life stress. 22:425-434.

696 22. Ghouri YA, Richards DM, Rahimi EF, Krill JT, Jelinek KA, DuPont AWJC, gastroenterology e.  
697 2014. Systematic review of randomized controlled trials of probiotics, prebiotics, and  
698 synbiotics in inflammatory bowel disease. 7:473.

699 23. Güvenç IA, Muluk NB, Mutlu FŞ, Eşki E, Altıntoprak N, Oktemer T, Cingi CJAJor, allergy. 2016.  
700 Do probiotics have a role in the treatment of allergic rhinitis? A comprehensive systematic  
701 review and Metaanalysis. 30:e157-e175.

702 24. Corpuz HM, Ichikawa S, Arimura M, Mihara T, Kumagai T, Mitani T, Nakamura S, Katayama SJN.  
703 2018. Long-term diet supplementation with *Lactobacillus paracasei* K71 prevents age-related  
704 cognitive decline in senescence-accelerated mouse prone 8. 10:762.

705 25. Tahmourespour A, Salehi R, Kermanshahi RKJBjocM. 2011. *Lactobacillus acidophilus*-derived  
706 biosurfactant effect on *gtfB* and *gtfC* expression level in *Streptococcus mutans* biofilm cells.  
707 42:330-339.

708 26. Coconnier M-H, Liévin V, Bernet-Camard M-F, Hudault S, Servin ALJAA, chemotherapy. 1997.  
709 Antibacterial effect of the adhering human *Lactobacillus acidophilus* strain LB. 41:1046-1052.

710 27. Huang S-Y, Chen L-H, Wang M-F, Hsu C-C, Chan C-H, Li J-X, Huang H-YJN. 2018. *Lactobacillus*  
711 *paracasei* PS23 delays progression of age-related cognitive decline in senescence accelerated  
712 mouse prone 8 (SAMP8) mice. 10:894.

- 713 28. Wang S, Ahmadi S, Nagpal R, Jain S, Mishra SP, Kavanagh K, Zhu X, Wang Z, McClain DA,  
714 Kritchevsky SBJG. 2020. Lipoteichoic acid from the cell wall of a heat killed *Lactobacillus*  
715 *paracasei* D3-5 ameliorates aging-related leaky gut, inflammation and improves physical and  
716 cognitive functions: from *C. elegans* to mice. 42:333-352.
- 717 29. Oh NS, Joung JY, Lee JY, Song JG, Oh S, Kim Y, Kim HW, Kim SHJGm. 2020. Glycated milk  
718 protein fermented with *Lactobacillus rhamnosus* ameliorates the cognitive health of mice  
719 under mild-stress condition. 11:1643-1661.
- 720 30. Kelly JR, Allen AP, Temko A, Hutch W, Kennedy PJ, Farid N, Murphy E, Boylan G, Bienenstock J,  
721 Cryan JFJB, behavior,, immunity. 2017. Lost in translation? The potential psychobiotic  
722 *Lactobacillus rhamnosus* (JB-1) fails to modulate stress or cognitive performance in healthy  
723 male subjects. 61:50-59.
- 724 31. Yunes R, Poluektova E, Dyachkova M, Klimina K, Kovtun A, Averina O, Orlova V, Danilenko VJA.  
725 2016. GABA production and structure of *gadB/gadC* genes in *Lactobacillus* and  
726 *Bifidobacterium* strains from human microbiota. 42:197-204.
- 727 32. Walls AB, Waagepetersen HS, Bak LK, Schousboe A, Sonnewald UJNr. 2015. The glutamine–  
728 glutamate/GABA cycle: function, regional differences in glutamate and GABA production and  
729 effects of interference with GABA metabolism. 40:402-409.
- 730 33. Lehnert H, Wurtman RJJP, psychosomatics. 1993. Amino acid control of neurotransmitter  
731 synthesis and release: physiological and clinical implications. 60:18-32.
- 732 34. O'Mahony SM, Clarke G, Borre Y, Dinan T, Cryan JJBbr. 2015. Serotonin, tryptophan  
733 metabolism and the brain-gut-microbiome axis. 277:32-48.
- 734 35. Lim S-D, Kim K-S, Do J-RJFSOAR. 2009. Physiological characteristics and GABA production of  
735 *Lactobacillus acidophilus* RMK567 isolated from raw milk. 29:15-23.
- 736 36. Lim S-D, Yoo S-H, Yang H-D, Kim S-K, Park S-YJFSOAR. 2009. GABA productivity in yoghurt  
737 fermented by freeze dried culture preparations of *Lactobacillus acidophilus* RMK567. 29:437-  
738 444.
- 739 37. Cao Y-N, Feng L-J, Wang B-M, Jiang K, Li S, Xu X, Wang W-Q, Zhao J-W, Wang Y-  
740 MJSjogojotSGA. 2018. *Lactobacillus acidophilus* and *Bifidobacterium longum* supernatants  
741 upregulate the serotonin transporter expression in intestinal epithelial cells. 24:59.
- 742 38. Rahimlou M, Hosseini SA, Majdinasab N, Haghighizadeh MH, Husain DJNN. 2020. Effects of  
743 long-term administration of Multi-Strain Probiotic on circulating levels of BDNF, NGF, IL-6 and  
744 mental health in patients with multiple sclerosis: a randomized, double-blind, placebo-  
745 controlled trial.1-12.
- 746 39. Perry RJ, Peng L, Barry NA, Cline GW, Zhang D, Cardone RL, Petersen KF, Kibbey RG, Goodman  
747 AL, Shulman GIJN. 2016. Acetate mediates a microbiome–brain– $\beta$ -cell axis to promote  
748 metabolic syndrome. 534:213-217.



- 749 40. He F, Zou J-T, Zhou Q-F, Niu D-L, Jia W-HJJon. 2014. Glatiramer acetate reverses cognitive  
750 deficits from cranial-irradiated rat by inducing hippocampal neurogenesis. 271:1-7.
- 751 41. Bourassa MW, Alim I, Bultman SJ, Ratan RRJNl. 2016. Butyrate, neuroepigenetics and the gut  
752 microbiome: can a high fiber diet improve brain health? 625:56-63.
- 753 42. Barichello T, Generoso JS, Simões LR, Faller CJ, Ceretta RA, Petronilho F, Lopes-Borges J,  
754 Valvassori SS, Quevedo JJMn. 2015. Sodium butyrate prevents memory impairment by re-  
755 establishing BDNF and GDNF expression in experimental pneumococcal meningitis. 52:734-  
756 740.
- 757 43. Norwitz NG, Hu MT, Clarke KJFin. 2019. The mechanisms by which the ketone body D- $\beta$ -  
758 hydroxybutyrate may improve the multiple cellular pathologies of Parkinson's disease. 6:63.
- 759 44. Hertz L, Chen Y, Waagepetersen HSJJon. 2015. Effects of ketone bodies in Alzheimer's disease  
760 in relation to neural hypometabolism,  $\beta$ -amyloid toxicity, and astrocyte function. 134:7-20.
- 761 45. Klein P, Janousek J, Barber A, Weissberger RJE, Behavior. 2010. Ketogenic diet treatment in  
762 adults with refractory epilepsy. 19:575-579.
- 763 46. Zhang Y, Ma C, Zhao J, Xu H, Hou Q, Zhang HJO. 2017. Lactobacillus casei Zhang and vitamin  
764 K2 prevent intestinal tumorigenesis in mice via adiponectin-elevated different signaling  
765 pathways. 8:24719.
- 766 47. Laue HE, Korricks SA, Baker ER, Karagas MR, Madan JCJSr. 2020. Prospective associations of the  
767 infant gut microbiome and microbial function with social behaviors related to autism at age 3  
768 years. 10:1-11.
- 769 48. Haran JP, Bhattarai SK, Foley SE, Dutta P, Ward DV, Bucci V, McCormick BAJM. 2019.  
770 Alzheimer's disease microbiome is associated with dysregulation of the anti-inflammatory P-  
771 glycoprotein pathway. 10.
- 772 49. Wang J, Lei X, Xie Z, Zhang X, Cheng X, Zhou W, Zhang YJA. 2019. CA-30, an oligosaccharide  
773 fraction derived from Liuwei Dihuang decoction, ameliorates cognitive deterioration via the  
774 intestinal microbiome in the senescence-accelerated mouse prone 8 strain. 11:3463.
- 775 50. Petrov V, Alifirova V, Saltykova I, Zhukova I, Zhukova N, Dorofeeva YB, Tyakht A, Altukhov I,  
776 Kostryukova E, Titova MJBOSM. 2017. Comparison study of gut microbiota in case of  
777 Parkinson's disease and other neurological disorders. 15:113-125.
- 778 51. Kim J, Kim H, Jeon S, Jo J, Kim Y, Kim HJAS. 2020. Synergistic Antibacterial Effects of Probiotic  
779 Lactic Acid Bacteria with Curcuma longa Rhizome Extract as Synbiotic against Cutibacterium  
780 acnes. 10:8955.
- 781 52. Ames J, Warner M, Brambilla P, Mocarelli P, Satariano WA, Eskenazi BJE. 2018. Neurocognitive  
782 and physical functioning in the Seveso Women's Health Study. 162:55-62.
- 783 53. Guo Z, Xie HQ, Zhang P, Luo Y, Xu T, Liu Y, Fu H, Xu L, Valsami-Jones E, Boksa PJEi. 2018.  
784 Dioxins as potential risk factors for autism spectrum disorder. 121:906-915.

- 785 54. Kandyala R, Raghavendra SPC, Rajasekharan STJ, JomFP mp. 2010. Xylene: An overview of  
786 its health hazards and preventive measures. 14:1.
- 787 55. Savolainen H, Pfäffli PJAot. 1980. Dose-dependent neurochemical changes during short-term  
788 inhalation exposure to m-xylene. 45:117-122.
- 789 56. Wick RR, Judd LM, Holt KEJGb. 2019. Performance of neural network basecalling tools for  
790 Oxford Nanopore sequencing. 20:1-10.
- 791 57. Li HJB. 2018. Minimap2: pairwise alignment for nucleotide sequences. 34:3094-3100.
- 792 58. Chen Y, McCarthy D, Robinson M, Smyth GKJBUsgAohwboprbeidep. 2014. edgeR: differential  
793 expression analysis of digital gene expression data User's Guide.
- 794 59. McMurdie PJ, Holmes SJPo. 2013. phyloseq: an R package for reproducible interactive analysis  
795 and graphics of microbiome census data. 8:e61217.
- 796 60. Douglas GM, Maffei VJ, Zaneveld J, Yurgel SN, Brown JR, Taylor CM, Huttenhower C, Langille  
797 MGJB. 2020. PICRUSt2: An improved and customizable approach for metagenome  
798 inference.672295.
- 799 61. Grant JR, Stothard PJNar. 2008. The CGView Server: a comparative genomics tool for circular  
800 genomes. 36:W181-W184.

801

802

803 **Tables**804 **Table 1. Metagenomic sequencing statistics of *L. acidophilus* group and control**

|                 | The number of samples | Total number of reads | Estimated base (Mb) | N50      | Total number of counts | Total number of OTUs |
|-----------------|-----------------------|-----------------------|---------------------|----------|------------------------|----------------------|
| LA <sup>a</sup> | 5                     | 312,384±31,887        | 1,434±143           | 4,872±90 | 252401.6±25,171        | 528.4±40             |
| W <sup>b</sup>  | 5                     | 335,356±45,814        | 1,485.6±215         | 4,748±40 | 259945.6±35,117        | 539.8±25             |
| Total           | 10                    | 323,870±37,604        | 1,459.8±173         | 4810±72  | 256173.6±28,860        | 534.1±32             |

805 <sup>a</sup>: *L. acidophilus* group, <sup>b</sup>: control group. There was no significant difference between groups. All  
806 values were presented as average ± standard error of the mean. Fecal samples compiled after 8  
807 weeks of probiotic ingestion were used for metagenome sequencing.

808

809 **Figure legends**

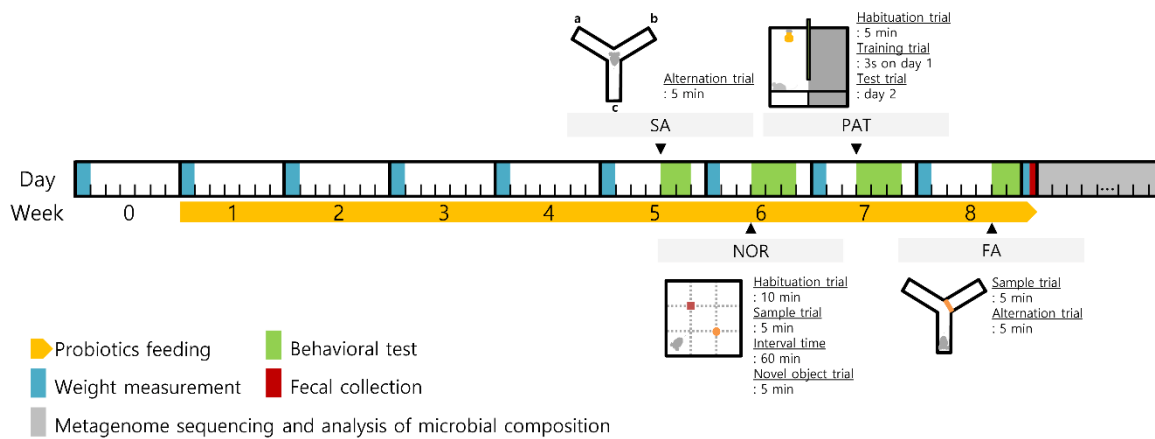

810 **Figure 1. Schematic diagram of the study to discover a new probiotic strain with improved**  
 811 **cognitive ability**

812 The diagram displays the experimental schedule by day and week for identifying probiotic strain  
 813 with improved cognitive ability. Cognitive ability was measured once a week by four behavioral  
 814 tests. The diagram of each experiment shows the first position of the animal.

816



817

818 **Figure 2. Measurement of additional effect after probiotic consumption**

819 Experimental groups are expressed in abbreviations. LA: *L. acidophilus* group, LPA: *Lcb.*

820 *Paracasei* group, LR: *Lcb. Rhamnosus* group, and W: tap water-fed group (control). (A) The

821 average daily water intake. All groups showed a similar average. (B) The change of daily intaken

822 probiotic amount by timeline. *L. acidophilus* was ingested in smaller amounts compared to the

823 other two strains. (C) The average body weight change for 8 weeks. All groups showed similar

824 averages.

825

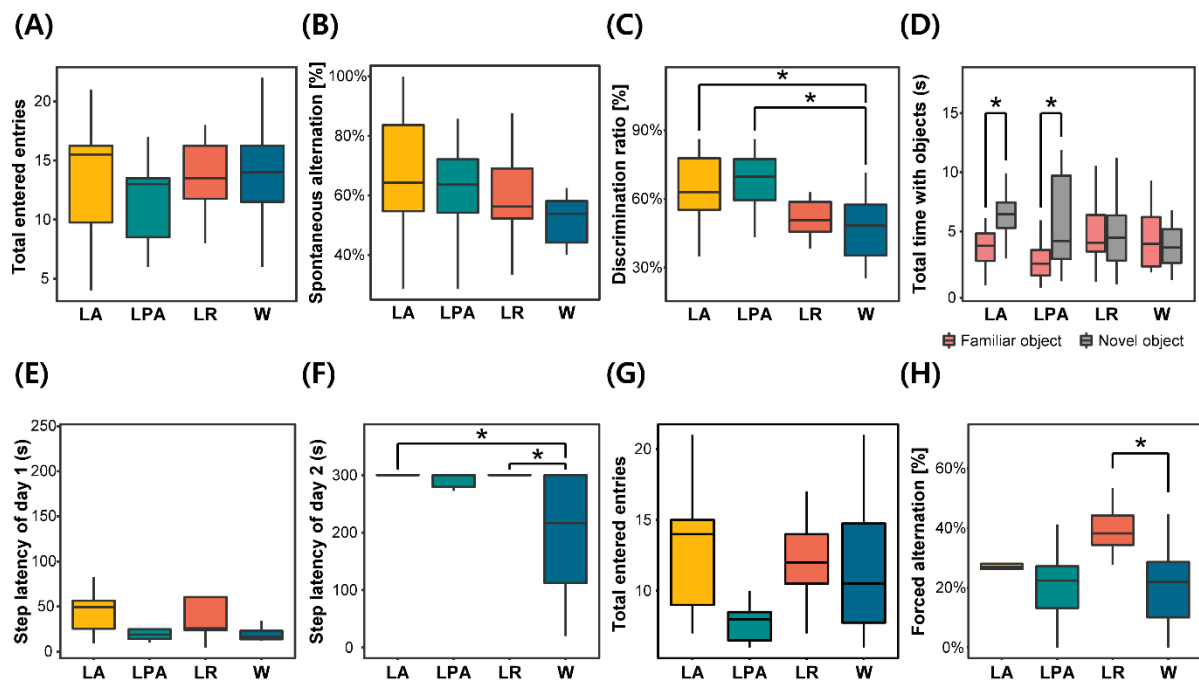

826

827 **Figure 3. Results of cognitive behavioral tests**

828 Experimental groups are expressed in abbreviations. LA: *L. acidophilus* group, LPA: *Lcb.*  
 829 *Paracasei* group, LR: *Lcb. rhamnosus* group, and W: the group fed on tap water (control). (A)  
 830 Total arm entries during spontaneous alternation test. (B) Spontaneous alternation. This is the  
 831 representative value of spontaneous alternation test. (C) Discrimination ratio. It is the  
 832 representative value of the novel object recognition test. (D) Comparison of the total time to  
 833 observe two objects. (E) Step-through latency of day 1. (F) Step-through latency of day 2. This is  
 834 the representative result of the passive avoidance task. (G) Total arm entries during forced  
 835 alternation test. (H) Forced alternation. This result is a representative value of forced alternation.  
 836 All comparison of average between experimental groups was measured by Wilcoxon rank-sum  
 837 test. Significant difference is presented with symbol (Adjusted P-value\* < 0.05).



838

839 **Figure 4. Results of metagenomics sequencing**

840 Experimental groups are expressed in abbreviations. LA: *L. acidophilus* group and W: the group

841 fed on tap water (control). (A) Rarefaction curve of metagenome sequencing. (B) Alpha-diversity

842 of the *L. acidophilus* group and control. (C) Beta-diversity using Bray-Cutis distance between

843 the *L. acidophilus* group and control. (D) Beta-diversity using Unifrac distance between both

844 groups. (E) Comparison of microbial composition at the phylum level. The blue-colored phylum

845 with the (\*) symbol showed a significant difference compared to the two experimental groups. (F)

846 Comparison of microbial composition at the species level. *L. acidophilus*: *Lactobacillus*

847 *acidophilus*, E. flexneri: *Escherichia flexneri*, R. hominis: *Roseburia hominis*, A. equolifaciens:  
848 *Adlercreutzia equolifaciens*, S. massiliensis: *Soleiferrea massiliensis*, Lchn. Eligens:  
849 *Lachnospira eligens*, Lch. Bovis\_A: *Lachnobacterium bovis\_A*, Lc. Phytofermentans:  
850 *Lachnoclostridium phytofermentans*, Bct. Pectinophilus: *Bacteroides\_F pectinophilus*, Lc.  
851 Sp900078195: *Lachnoclostridium sp900078195*, Bt. Massiliensis: *Bittarella massiliensis*, G.  
852 massiliensis: *Gemella massiliensis*, St. auricularis: *Staphylococcus auricularis*, Br. Massiliensis:  
853 *Bariatricus massiliensis*, B. sp002556365: *Bacillus\_AW sp002556365*, D. nigrificans:  
854 *Desulfotomaculum nigrificans*. All comparisons of average between experimental groups were  
855 measured by independence t-test. Significant difference is presented with symbol (Adjusted P-  
856 value\* < 0.05, P-value\*\* < 0.01).

857





858

859 **Figure 5. Results of functional profiling**

860 Predictive functional profiling of microbiome. All predicted functions have a positive LDA score

861 for the *L. acidophilus* group.

862



863

864 **Figure 6. Spearman's rank correlation analysis**

865 Correlation analysis was conducted to detect association among bacterial OTUs, measured  
 866 cognitive abilities, and fermentation products. The color intensity and circle size show the  
 867 strength of the correlation. Red color represents a negative correlation, and blue color is a  
 868 positive correlation. Only circles with adjusted P-value under 0.01 are illustrated in the matrix.  
 869 Results of cognitive ability evaluation were classified by 4 colors: NOR (purple), FA (blue), PAT  
 870 (deep green), and SA (brown). Significant P values indicated by the symbol \* ( $<0.05$ ) and \*\*  
 871 ( $<0.01$ ).

872



873

874 **Figure 7. Genomic comparison of 3 probiotic strains**

875 (A) Functional classification of protein coding sequences. All predicted protein sequences were  
 876 classified by categories by SEED system. (B) Subcategories in [Fatty Acids, Lipids, and  
 877 Isoprenoids] and [Amino Acids and Derivatives]. [Fatty Acids, Lipids, and Isoprenoids]  
 878 subcategory showed yellow-green colored head and [Amino Acids and Derivatives] category  
 879 presented light gray colored head.



**(A)****(B)****(C)**

**(A)****(B)****(C)**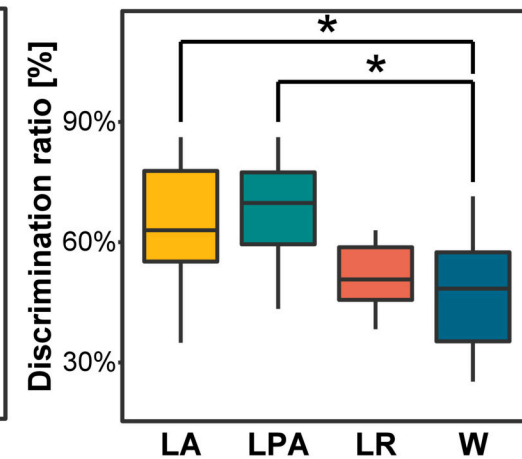**(D)**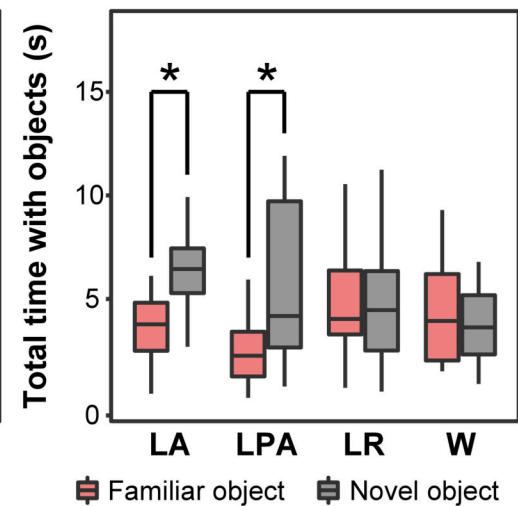**(E)****(F)**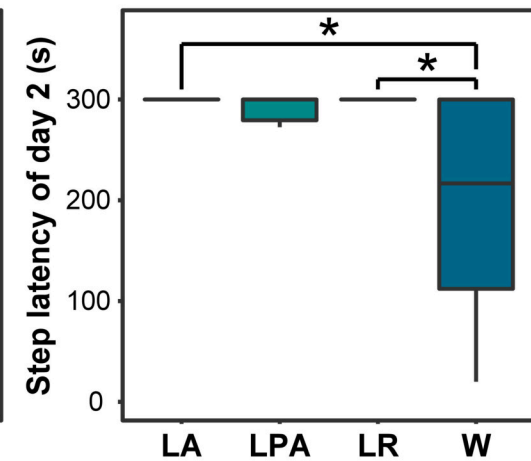**(G)**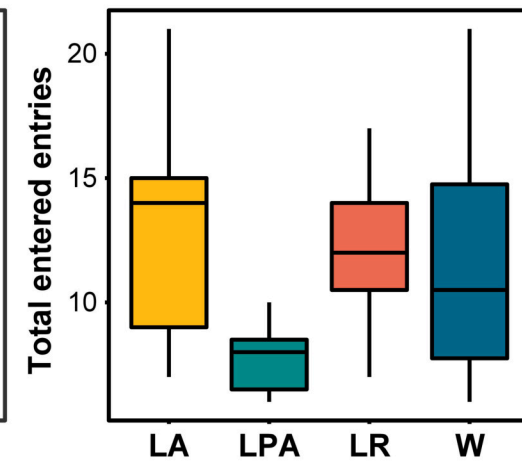**(H)**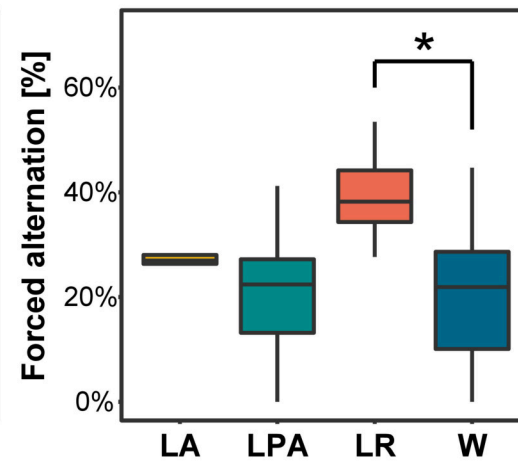

**(A)**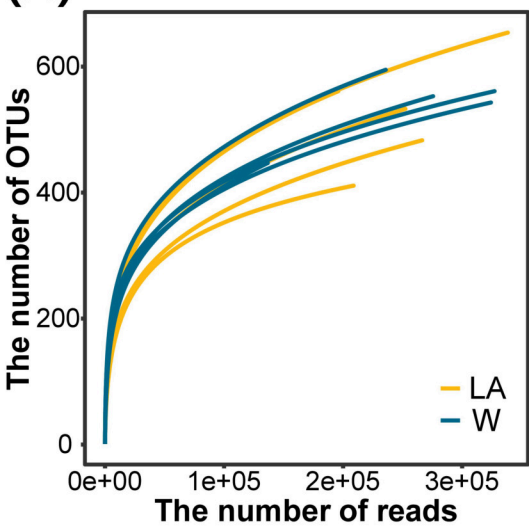**(B)**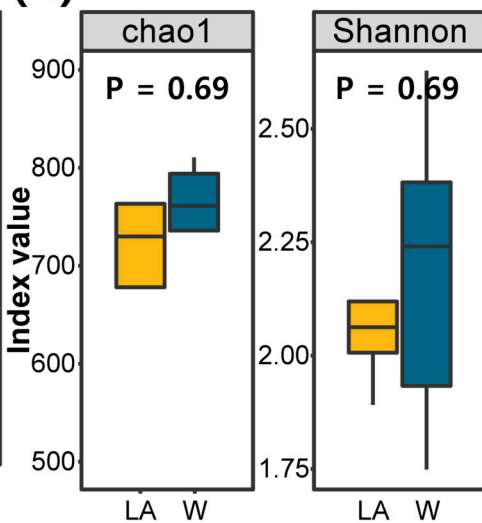**(C)****(D)****(E)**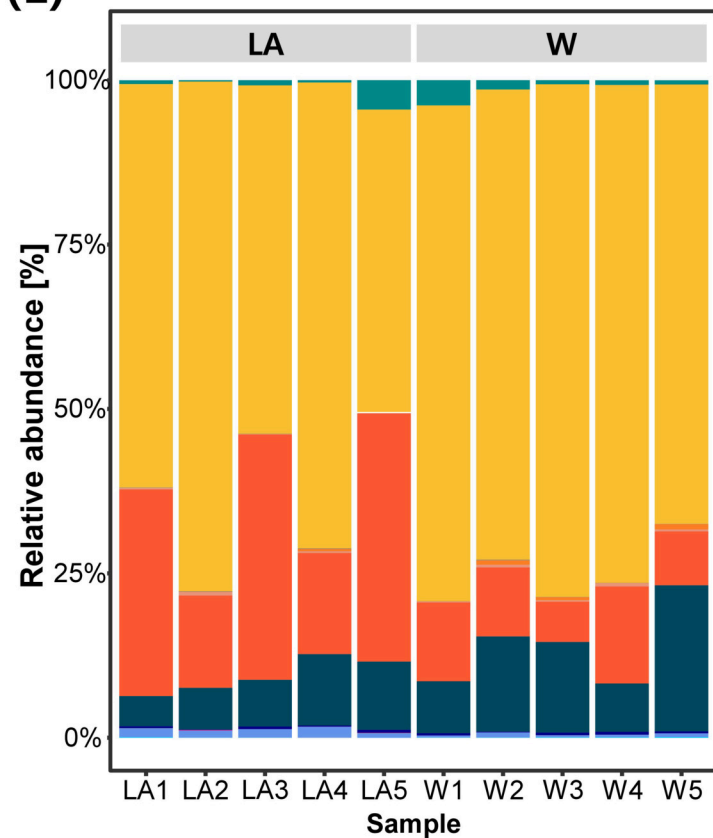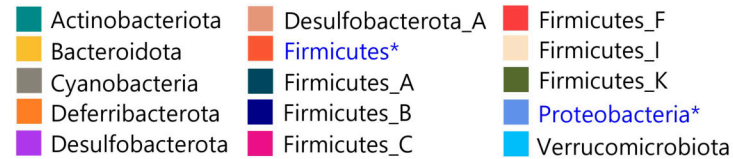**(F)**

**KEGG level1** ■ Environmental Information Processing ■ Human Diseases ■ Metabolism







**(A)****Protein proportion [%]**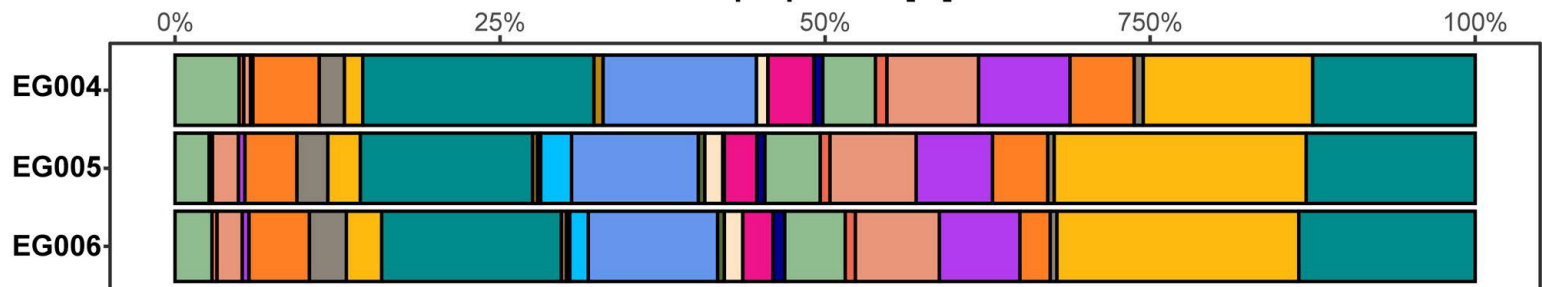**Subcategory**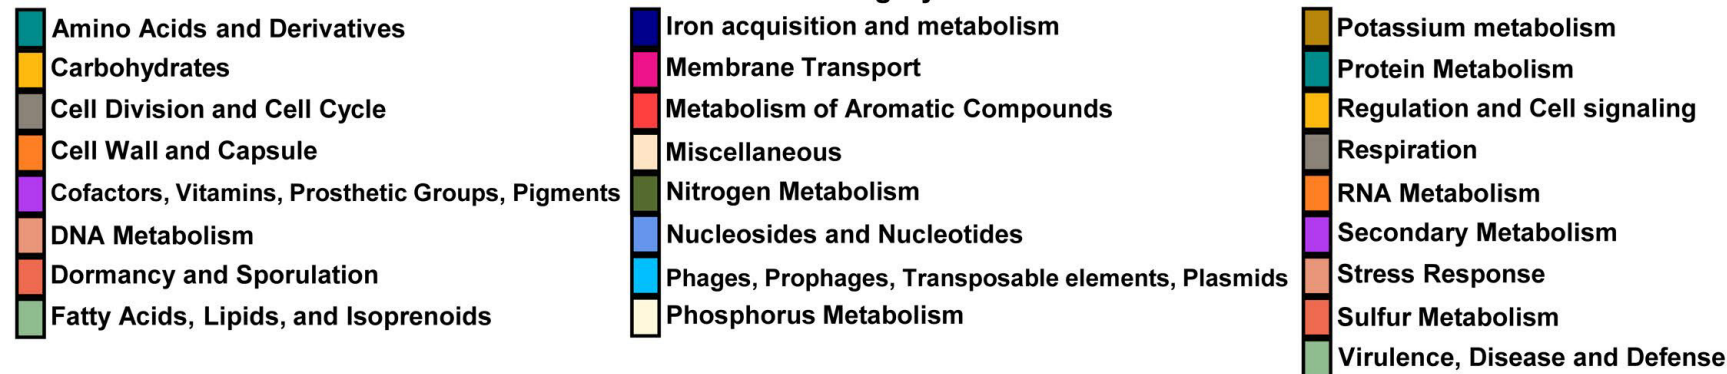**(B)**

■ EG004 ■ EG005 ■ EG006

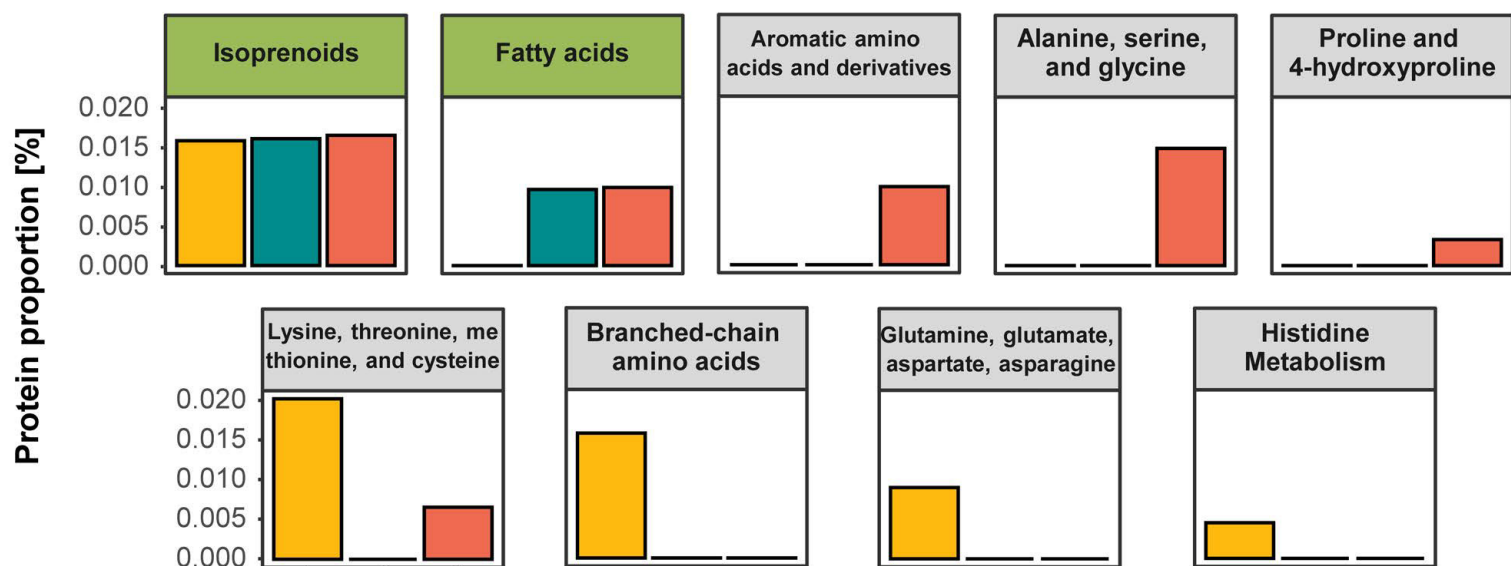



### Brief Rebuttal to the remarks of the reviewer3

**Comment #1 of the reviewer3:** Line 54 - Cognition is one of the functions of the brain. The authors should write in the Manuscript the idea that they study bacterial strain that has positive effects on brain function, which can be recognized through changes in cognitive processes.

#### Amendment for comment #1

We appreciate the reviewer for pointing out the most important part of understanding the experimental design. The context has been added in the Abstract and Introduction parts, and it will help readers naturally understand the research aim (*Line 54-56, page 4*).

**Comment #2 of the reviewer3:** Line 68 - In the annotation, you do not say a word about strains EG005 and EG006. Why? Also, add into the discussion part more information about comparison and differences in the action of these three strains. Explain the reasons for these differences.

#### Amendment for comment #2

Thank you for your valuable advice. In order to focus on *L. acidophilus* EG004, the results of the other two strains were omitted in the abstract of the previous manuscript. To increase the overall understanding of the study, we have added results for *Lcb. paracasei* EG005 and *Lcb. rhamnosus* EG006 to Abstract (*Line 58-60, page 4*). In addition, referring to the reviewer's advice, discussion was revised to provide comparative information on the effects after ingestion of the three strains (*Line 294-319, page 16-17, and Supplementary Table3*). This additional explanation will provide the reader with a richer understanding of the cognitive abilities of each Lactic acid bacteria.

**Comment #3 of the reviewer3:** Line 130 - will be better if you use the word - healing effects

#### Amendment for comment #3

Based on the reviewer comments, the word was modified to a more appropriate word (*Line 129-131, page 7*).



**Comment #4 of the reviewer3:** Line 150 - what kind of molecular method? add the explanation into the text.

**Amendment for comment #4**

Thanks for your kind comments. The previous expression as “molecular method” has been replaced by “16S rRNA sequencing” (*Line 149-150, page 9*). A detailed description of this method can be found in the Materials and methods section. We expect that this clear statement will help the reader's understanding.

**Comment #5 of the reviewer3:** Line 390 - you wrote - that the antibacterial activity of *L. acidophilus* EG004 was the potential reason for cognitive ability enhancement. - how it is possible? Why do you assume this?

**Amendment for comment #5**

We thank the reviewer for raising this issue. We assumed that the low levels of the microorganisms (such as *Adlercreutzia equolifaciens* and *Roseburia hominis*) were affected by ingested *L. acidophilus* EG004. The only difference was the intake of *L. acidophilus* between the control group and the *L. acidophilus* group. Based on the function of *L. acidophilus* indicated in previous studies, we estimated that *L. acidophilus* interfered with the habitat and growth of other microorganisms through preoccupation of habitat and antibacterial activity. However, we did not provide experimental evidence for the process in this study. We acknowledge that the current argument has some leaps and bounds. This may be misleading to readers. Accordingly, we omitted the detailed explanation of the presumed mechanism, leaving only the assumption that *L. acidophilus* may have been affected with toning down of suggestion (*Line 391-395, page 20*). The revised manuscript will be able to more accurately convey the effects of *L. acidophilus* to the reader.

**Comment #6 of the reviewer3:** Line 407 - Line 54 - Cognition is one of the functions of the brain. The authors should write in the Manuscript the idea that they study bacterial strain that has positive effects on brain function, which can be recognized through changes in cognitive processes.

**Amendment for comment #6**

Thanks for pointing out the most important part of understanding the experimental design (*Line 54-56,*



*page 4* and *Line 411-415, page 21*). The content has been added to the Abstract and introduction so that the purpose of the study can be understood naturally.

**Comment #7 of the reviewer3:** [Line 421 - why male?](#)

**Amendment for comment #7**

We thank the reviewer for raising this issue. In an animal experiment, it is an ideal experiment by setting females and males as separate groups. However, our experiment was performed using only male subjects with consideration of some concerns.

- Simplification of the experimental variation affecting the interpretation of results<sup>1</sup>
- Prevention of statistical power loss due to small subsamples for each sex<sup>2</sup>
- Estimation that there is no difference between the intestinal environment and the brain-gut axis system between female and male
- Male is mainly used in animal experiments for the brain-gut axis
- Restrictions on money, time, and the skill level of the experimenter.

Ideally, it is appropriate to use both males and females, but in consideration of these concerns, male mice were used. In order to provide this specific information to readers, this information was added to the manuscript (*Line 426-430, page 22*). We believe that it will help the reader's understanding.

**Comment #8 of the reviewer3:** [Line 605 - Why is EG004 do not present here?](#)

**Amendment for comment #8**

Thank you for your valuable advice. Since *L. acidophilus* EG004 was previously sequenced using the PacBio platform, only *Lcb. paracasei* EG005 and *Lcb. rhamnosus* EG006 were newly sequenced for this study. The sequence information of *L. acidophilus* EG004 is mentioned in *Line 634-636* and *page 31*, and related papers were cited to provide the sequencing information to readers. Also, since the paragraph indicated by the reviewer is about sequence information of the three strains, the sentence was changed to



‘Whole-genome sequencing of EG005 and EG006 and Whole-genome sequence of EG004’ (*Line 614, page 30*).

**Comment #9 of the reviewer3:** Line 623 - Add here the information from Data availability - The complete sequences of *Lcb. paracasei* EG005 and *Lcb. rhamnosus* EG006 is available in the NCBI database with accession numbers, SAMN23227569 and SAMN23227570, respectively. The metagenomic sequences are available in the NCBI database under the accession number PRJNA781018.

**Amendment for comment #9**

Thank you for the reviewer’s advice. Data availability information was added to the appropriate part (Whole-genome sequences of three probiotics; *Line 632-636, page 31*, and metagenomics data; *Line 586-587, page 30*).



Dept. of Agricultural Biotechnology and Research  
Institute of Agriculture and Life Sciences  
Seoul National University  
San 56-1 Daehak-dong, Gwanak-gu, Seoul 151-742  
Republic of Korea

## References

- 1 Fields, R. D. J. N. NIH policy: mandate goes too far. *510*, 340-340 (2014).
  - 2 Richardson, S. S., Reiches, M., Shattuck-Heidorn, H., LaBonte, M. L. & Consoli, T. J. P. o. t. N. A. o. S. Opinion: focus on preclinical sex differences will not address women's and men's health disparities. *112*, 13419-13420 (2015).
-

December 7, 2021

Prof. Heebal Kim  
Seoul National University  
Seoul  
Korea (South), Republic of

Re: Spectrum01815-21R2 (Positive effect on cognitive ability of *Lactobacillus acidophilus* EG004 in healthy mouse and fecal microbiome analysis using full-length 16S-23S rRNA metagenome sequencing)

Dear Prof. Heebal Kim:

Thanks for addressing the Reviewer's comments and congratulations on the acceptance of your manuscript for publication at Spectrum!

Your manuscript has been accepted, and I am forwarding it to the ASM Journals Department for publication. You will be notified when your proofs are ready to be viewed.

The ASM Journals program strives for constant improvement in our submission and publication process. Please tell us how we can improve your experience by taking this quick [Author Survey](#).

As an open-access publication, Spectrum receives no financial support from paid subscriptions and depends on authors' prompt payment of publication fees as soon as their articles are accepted. You will be contacted separately about payment when the proofs are issued; please follow the instructions in that e-mail. Arrangements for payment must be made before your article is published. For a complete list of **Publication Fees**, including supplemental material costs, please visit our [website](#).

Corresponding authors may [join or renew ASM membership](#) to obtain discounts on publication fees. Need to upgrade your membership level? Please contact Customer Service at [Service@asmusa.org](mailto:Service@asmusa.org).

Thank you for submitting your paper to Spectrum.

Sincerely,

Jan Claesen  
Editor, Microbiology Spectrum

Journals Department  
American Society for Microbiology  
1752 N St., NW  
Washington, DC 20036  
E-mail: [spectrum@asmusa.org](mailto:spectrum@asmusa.org)

Supplemental material: Accept
