# Supplementary material for: Positive Effect of Lactobacillus acidophilus EG004 on Cognitive Ability of Healthy Mice by Fecal Microbiome Analysis Using Full-Length 16S-23S rRNA Metagenome Sequencing
Source: PubMed Central journal article supplement (PMC8754107; doi:10.1128/spectrum.01815-21), 2022-01-12
Supplement: spectrum01815-21_supp_1_seq10.pdf [file spectrum01815-21_supp_1_seq10.pdf]

## Supplementary Information

### Contents

#### Supplementary Figures

|                                                                                                            |   |
|------------------------------------------------------------------------------------------------------------|---|
| Figure S1. Phylogenetic tree using 16S rRNA of three probiotic strains.....                                | 2 |
| Figure S2. Animal body weight changes by week.....                                                         | 3 |
| Figure S3. Comparison of microbial composition between the group fed <i>L. acidophilus</i> and control ... | 4 |
| Figure S4. Circularized genome of <i>L. acidophilus</i> EG004.....                                         | 5 |
| Figure S5. Circularized genome of <i>Lcb. paracasei</i> EG005.....                                         | 6 |
| Figure S6. Circularized genome of <i>Lcb. rhamnosus</i> EG006.....                                         | 7 |

#### Supplementary Tables

|                                                          |    |
|----------------------------------------------------------|----|
| Table S1. Results of cognitive behavioral tests .....    | 8  |
| Table S2. SCFA identification in bacterial culture ..... | 9  |
| Table S3. Cognitive ability assessment score .....       | 10 |

## Supplementary Figures

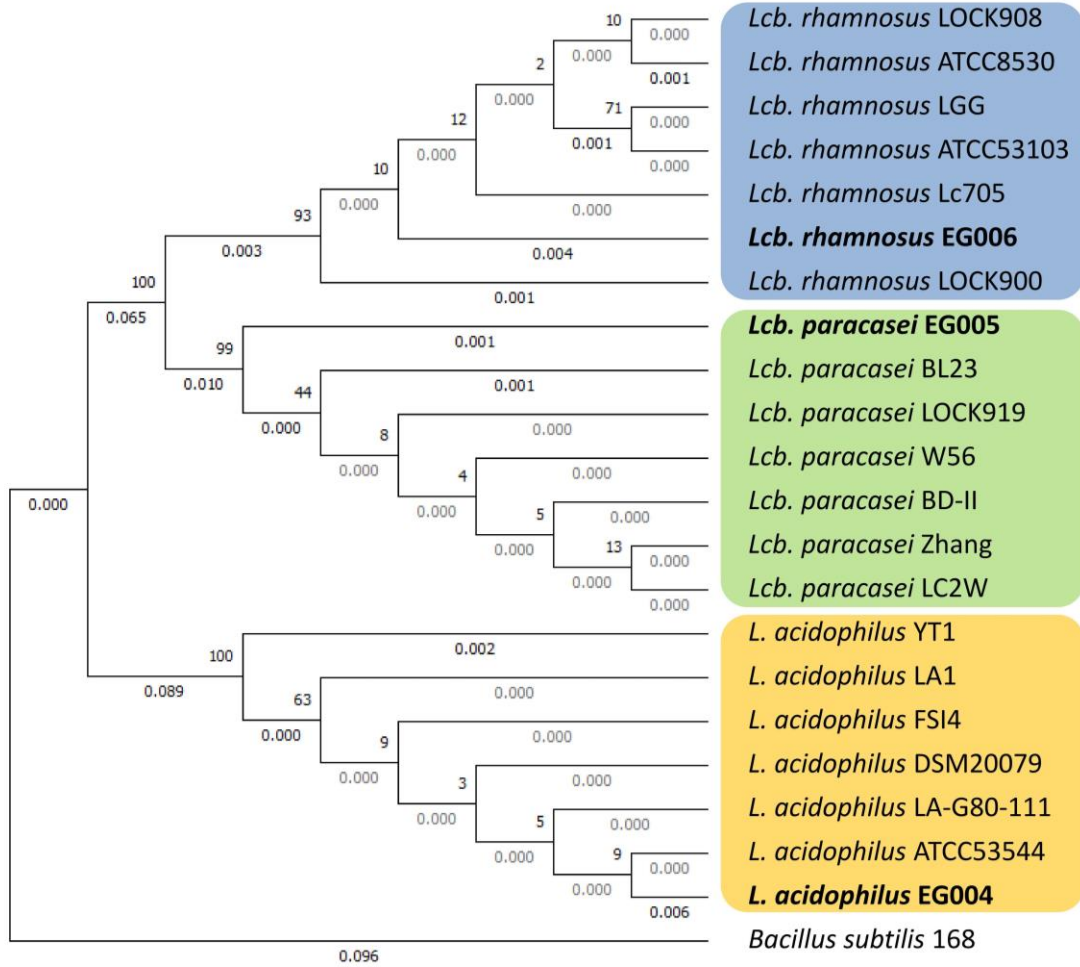

**Figure S1. Phylogenetic tree using 16S rRNA of three probiotic strains**

Phylogenetic tree by Maximum likelihood method based on 16S rRNA sequences for 14 *Lactocaseibacillus* genera and 7 *L. acidophilus* species including three strains in our study. Bootstrapping was conducted 1000 times, and the *Bacillus subtilis* 168 was used as an outgroup. The same species were enclosed in colored boxes, and three strains used in our study were presented in bold font.

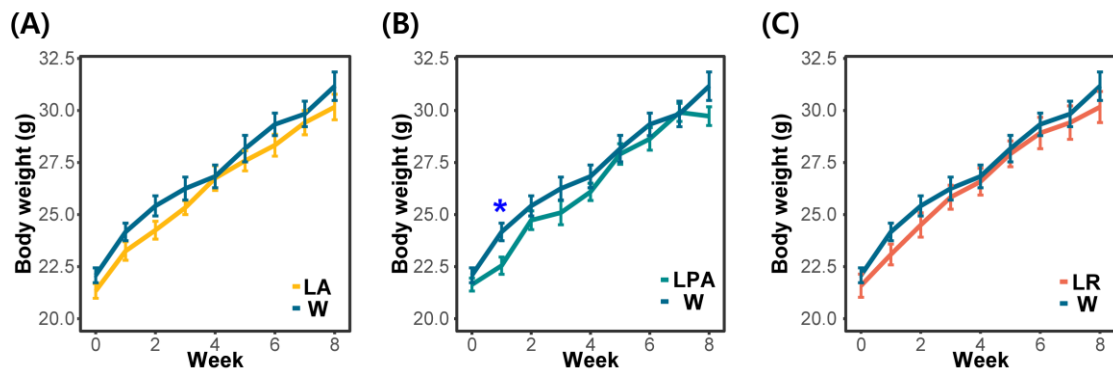

**Figure S2. Animal body weight changes by week**

We measured body weight of the mice every week. The average difference was found between the group fed *Lcb. paracasei* and control, but it was immediately recovered.

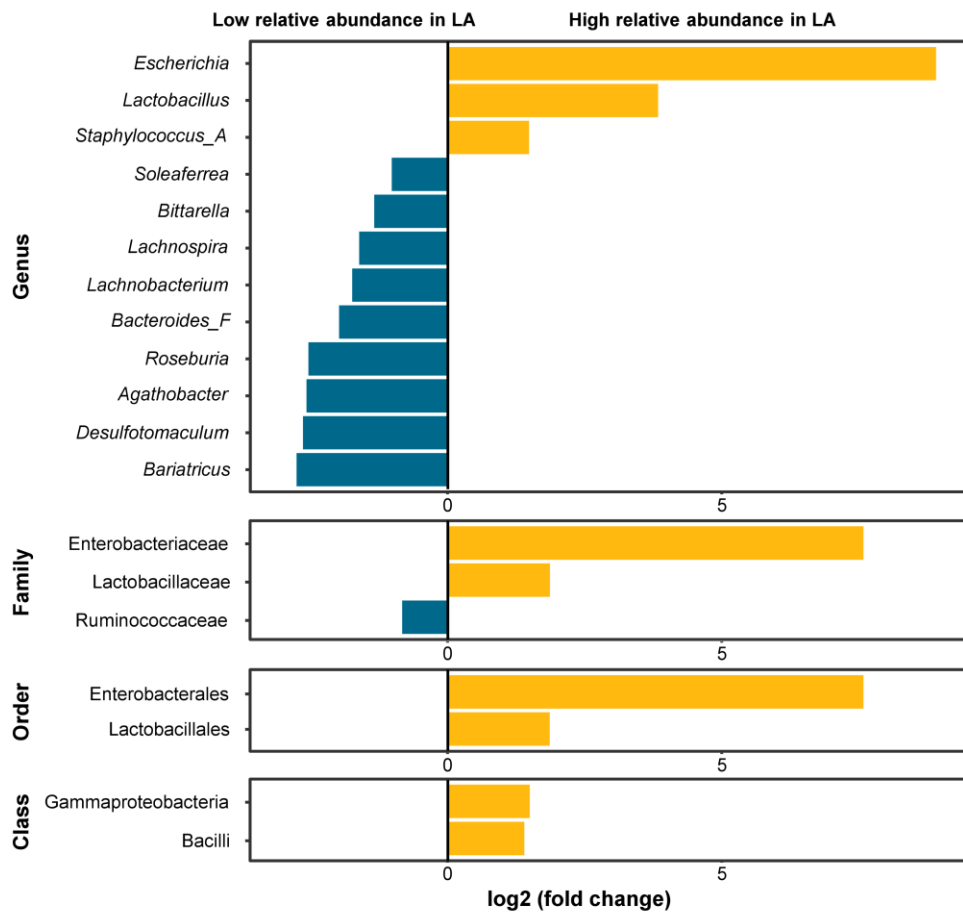

**Figure S3. Comparison of microbial composition between the group fed *L. acidophilus* and control**

We compared microbial composition of the group fed *L. acidophilus* and control at all taxonomic levels. The taxonomy found with high relative abundance in the group fed *L. acidophilus* showed yellow bar, while the other showed turquoise colored bar.

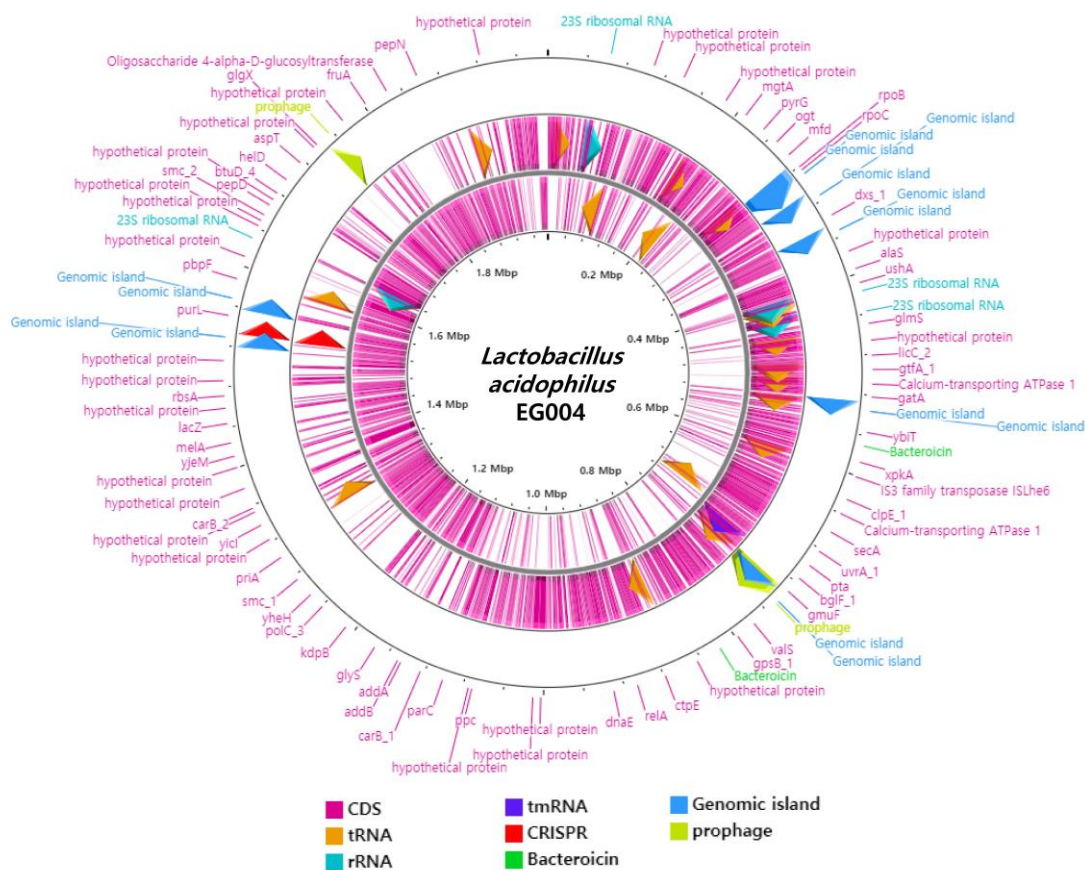

**Figure S4. Circularized genome of *L. acidophilus* EG004**

The genetic map represents main genetic factors of *L. acidophilus* EG004. There are three rings in generated, which indicates potential virulence factors (outermost ring), genes encoded on the forward strand, genes encoded on the backward stand (innermost ring).

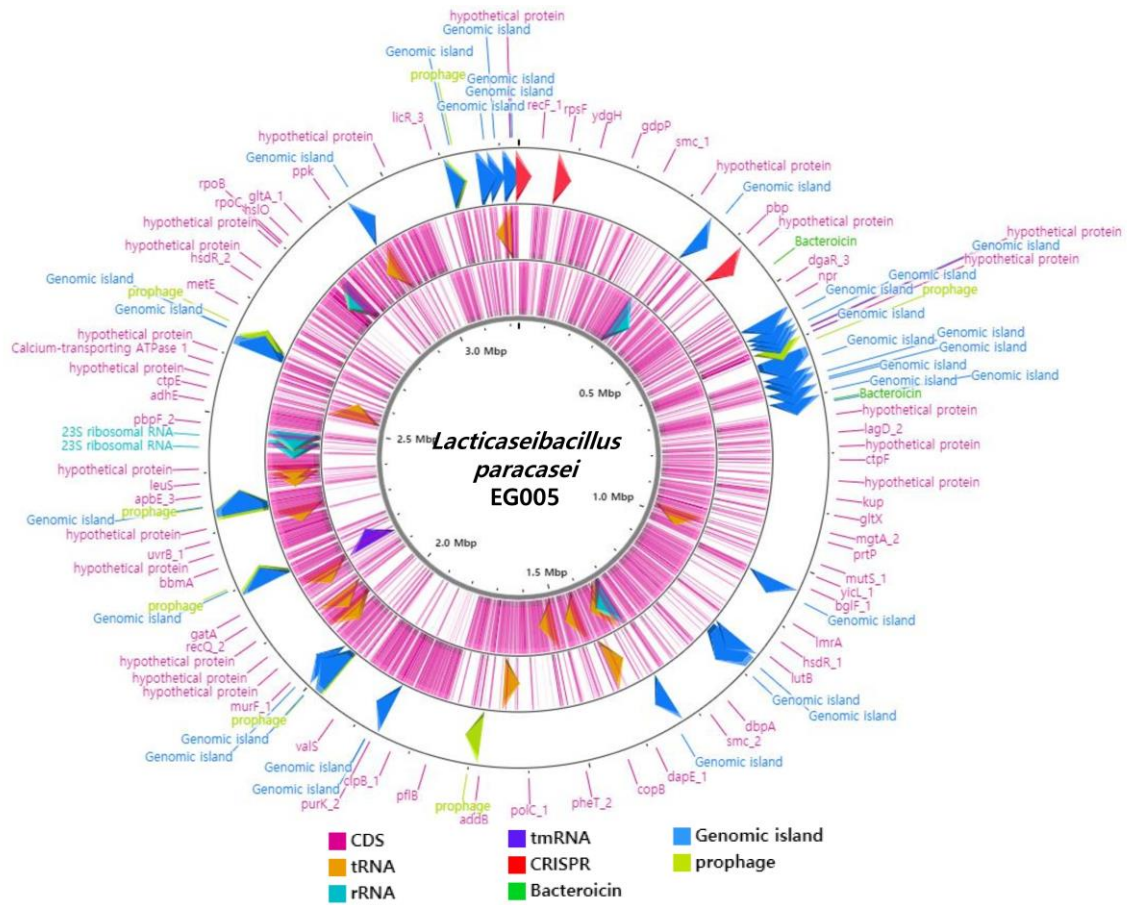

**Figure S5. Circularized genome of *Lcb. paracasei* EG005**

This genetic map represents main genetic factors of *Lcb. paracasei* EG005. There are three rings in generated, which indicates potential virulence factors (outermost ring), genes encoded on the forward strand, genes encoded on the backward stand (innermost ring).

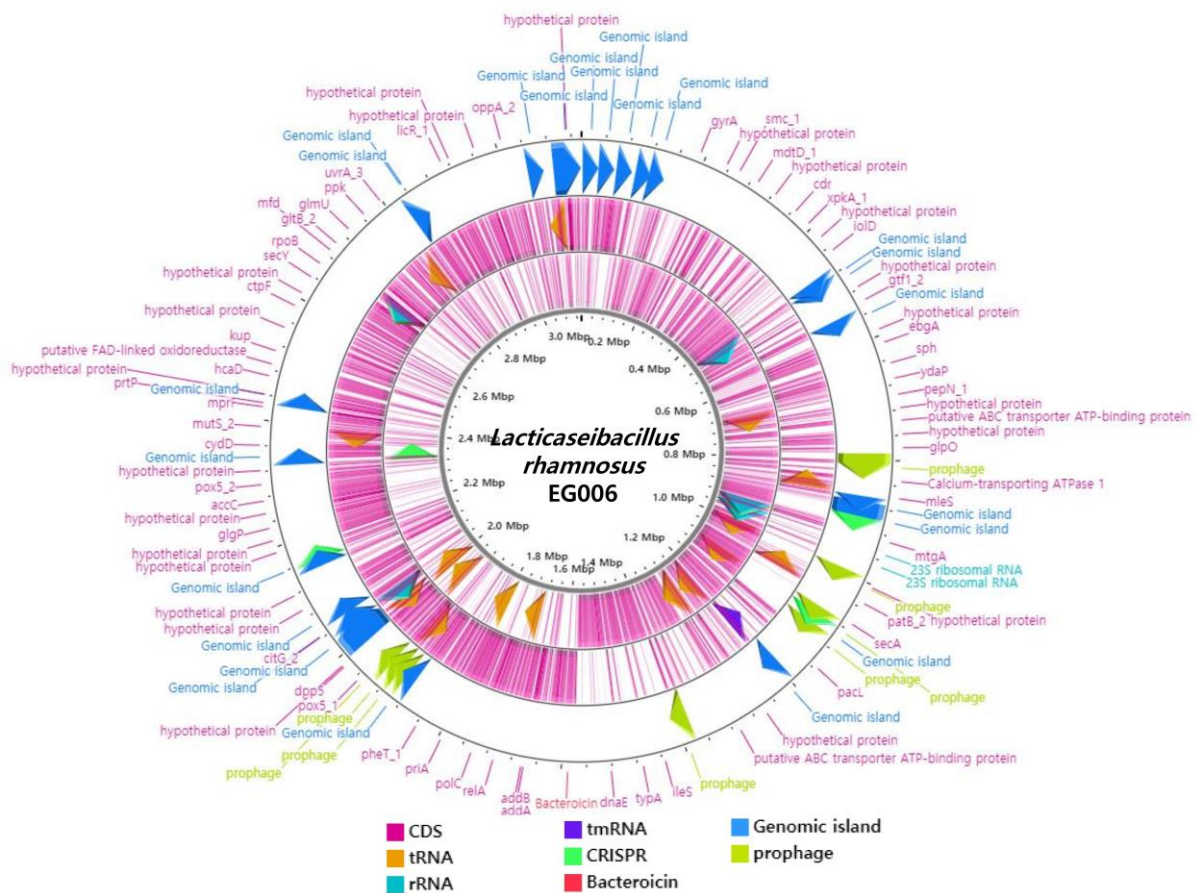

**Figure S6. Circularized genome of *Lcb. rhamnosus* EG006**

The physical map shows main genetic factors of *Lcb. rhamnosus* EG006. There are three rings in generated, which indicates potential virulence factors (outermost ring), genes encoded on the forward strand, genes encoded on the backward stand (innermost ring).

## Supplementary Tables

**Table S1. Results of cognitive behavioral tests**

| Test | Assessment parameter                        | LA <sup>a</sup>   | LPA <sup>b</sup>  | LR <sup>c</sup>   | Control      |
|------|---------------------------------------------|-------------------|-------------------|-------------------|--------------|
| SA   | Spontaneous alternation <sup>*</sup> [%]    | <i>66.08±6.11</i> | 62.36±4.96        | 59.42±4.51        | 52.02±2.58   |
|      | Total arm entries                           | 13.83±0.41        | 11.36±0.34        | 13.75±0.27        | 13.83±0.36   |
|      | Group ratio <sup>d,*</sup> [%]              | <i>75.00</i>      | 63.64             | 58.33             | 66.67        |
| NOR  | Discrimination ratio <sup>*</sup> [%]       | 63.39±4.59        | <i>64.53±6.06</i> | 51.50±2.40        | 46.92±4.89   |
|      | Group ratio <sup>e,*</sup> [%]              | <i>83.33</i>      | 72.73             | 41.67             | 60.00        |
|      | Time <sup>f</sup> Familiar <sup>g</sup> (s) | 4.10±0.76         | 2.75±0.68         | 4.83±0.92         | 4.32±0.81    |
|      | Time <sup>g</sup> Novel <sup>h</sup> (s)    | 6.73±0.92         | 5.74±1.29         | 5.47±1.30         | 3.68±0.61    |
|      | Number <sup>h</sup> Familiar <sup>i</sup>   | 5.17±0.65         | 3.00±0.66         | 5.92±0.72         | 5.50±0.95    |
|      | Number <sup>i</sup> Novel <sup>j</sup>      | 7.75±0.91         | 5.45±0.92         | 7.50±1.59         | 5.40±0.83    |
| PAT  | Step latency at day 1 (s)                   | 43.62±8.54        | 21.85±5.38        | 67.69±27.31       | 23.60±6.52   |
|      | Step latency at day 2 <sup>*</sup> (s)      | <i>300±0.00</i>   | 281.20±14.05      | 292.59±7.41       | 193.79±41.97 |
| FA   | Forced alternation <sup>*</sup> [%]         | 28.92±5.72        | 20.63±5.04        | <i>37.90±3.84</i> | 23.33±6.03   |
|      | Total arm entries                           | 18.20±3.09        | 10.71±0.81        | 17.36±1.16        | 15.42±1.73   |
|      | Group ratio <sup>j,*</sup> [%]              | <i>83.33</i>      | 55.56             | 66.67             | 66.67        |

<sup>a</sup>: the group fed *L. acidophilus*, <sup>b</sup>: the group fed *Lcb. paracasei* <sup>c</sup>: the group fed *Lcb. rhamnosus*, <sup>d</sup>: The ratio of the mouse entered spontaneous alternation at first 3 entries, <sup>e</sup>: ratio of the mouse touched novel object at first, <sup>f-i</sup>: Time and number of touched Familiar or Novel objects, <sup>j</sup>: ratio of the mouse entered novel arm, and <sup>\*</sup>: items for cognitive ability evaluation score. The highest value of cognitive ability indicators among the experimental groups was represented with red colored italic font. All values are shown as the mean ± SEM.



**Table S2. SCFA identification in bacterial culture**

| Strain | Ret.Time (min) | Peak Name   | Height ( $\mu$ RIU) | Area ( $\mu$ RIU*min) | Rel.Area (%) | Amount (mg/L) | Rel.Amount (%) |
|--------|----------------|-------------|---------------------|-----------------------|--------------|---------------|----------------|
| EG004  | 15.66          | Lactic acid | 72.540              | 27.036                | 81.58        | 13493.703     | 74.55          |
|        | 18.69          | Acetic acid | 14.314              | 6.103                 | 18.42        | 4605.749      | 25.45          |
|        | Total          |             | 86.855              | 33.139                | 100.00       | 18099.452     | 100.00         |
| EG005  | 15.65          | Lactic acid | 80.019              | 29.558                | 83.96        | 14752.368     | 77.58          |
|        | 18.68          | Acetic acid | 13.566              | 5.649                 | 16.04        | 4262.900      | 22.42          |
|        | Total          |             | 93.585              | 35.207                | 100.00       | 19015.268     | 100.00         |
| EG006  | 15.65          | Lactic acid | 50.834              | 18.616                | 77.89        | 9291.048      | 69.96          |
|        | 18.68          | Acetic acid | 12.576              | 5.286                 | 22.11        | 3989.009      | 30.04          |
|        | Total          |             | 63.410              | 23.901                | 100.00       | 13280.058     | 100.00         |

Short-chain fatty acids were measured by HPLC analysis. Broth media cultured for 24 hours were used for the analysis.

**Table S3. Cognitive ability assessment score**

| Test | Evaluation item              | LA <sup>a</sup> | LPA <sup>b</sup> | LR <sup>c</sup> | Control |
|------|------------------------------|-----------------|------------------|-----------------|---------|
| SA   | Spontaneous alternation [%]  | 4               | 3                | 2               | 1       |
|      | Group ratio <sup>d</sup> [%] | 4               | 2                | 1               | 3       |
| NOR  | Discrimination ratio [%]     | 3               | 4                | 2               | 1       |
|      | Group ratio <sup>e</sup> [%] | 4               | 3                | 1               | 2       |
| PAT  | Step latency at day 2 (s)    | 4               | 2                | 3               | 1       |
|      | Forced alternation [%]       | 3               | 1                | 4               | 2       |
| FA   | Group ratio <sup>i</sup> [%] | 4               | 1                | 2               | 2       |
|      | Total                        | 26              | 16               | 15              | 12      |

<sup>a</sup>: the group fed *L. acidophilus*, <sup>b</sup>: the group fed *Lcb. paracasei* <sup>c</sup>: the group fed *Lcb. rhamnosus*, <sup>d</sup>: The ratio of the mouse entered spontaneous alternation at first 3 entries, <sup>e</sup>: ratio of the mouse touched novel object at first, and <sup>i</sup>: ratio of the mouse entered novel arm. Scores of each cognitive ability assessment were given in ascending order of ranking (1-4 points).
